# Supplementary material for: Evaluation of commonly used analysis strategies for epigenome- and transcriptome-wide association studies through replication of large-scale population studies
Source: Genome Biol. 2019 Nov 14;20:235. doi: 10.1186/s13059-019-1878-x (PMC6857161; doi:10.1186/s13059-019-1878-x)
Supplement: Supplementary file 1 — Additional file 1: Table S1. Results of all DNAm (A) and RNA-seq (B) models. [file 13059_2019_1878_MOESM1_ESM.xlsx]

## Sheet: DNAm
No.	Phenotype	Cohort-out	Colour	STEP	1_Dataset	2_Model	3_Cell_counts	4_Technical	Method	Inflation-Before	Bias-Before	Inflation-After	Bias-After	#Meta	#repl	repl_lower	repl_higher	range_low	range_high	%repl	perc_repl_lower	perc_repl_higher	perc_range_low	perc_range_high
A2	Smoking	RS	Green	A	Beta	LM	Measured	PlateRow	BON	1.02798	-0.142091	1.0021	-0.00334216	800	209					26.125
A2	Smoking	LL	Green	A	Beta	LM	Measured	PlateRow	BON	0.944394	0.0504416	0.995035	0.00454152	643	307					47.7449
A2	Smoking	LLS	Green	A	Beta	LM	Measured	PlateRow	BON	1.11886	-0.398448	1.01082	-0.0163017	996	164					16.4659
A2	Smoking	NTR	Green	A	Beta	LM	Measured	PlateRow	BON	1.05939	0.0868023	1.14418	0.322941	801	247					30.8365
A2	Smoking	Average	Green	A	Beta	LM	Measured	PlateRow	BON	NA	NA	NA	NA	810	231.75	67.75	75.25	164	307	30.2931	13.8272	17.4519	16.4659	47.7449
A2	Smoking	RS	Green	A	Beta	LM	Measured	PlateRow	FDR	1.02798	-0.142091	1.0021	-0.00334216	5271	225					4.26864
A2	Smoking	LL	Green	A	Beta	LM	Measured	PlateRow	FDR	0.944394	0.0504416	0.995035	0.00454152	4221	351					8.31557
A2	Smoking	LLS	Green	A	Beta	LM	Measured	PlateRow	FDR	1.11886	-0.398448	1.01082	-0.0163017	7384	117					1.58451
A2	Smoking	NTR	Green	A	Beta	LM	Measured	PlateRow	FDR	1.05939	0.0868023	1.14418	0.322941	5072	255					5.0276
A2	Smoking	Average	Green	A	Beta	LM	Measured	PlateRow	FDR	NA	NA	NA	NA	5487	237	120	114	117	351	4.79908	3.21457	3.51649	1.58451	8.31557
A2	BMI	RS	Green	A	Beta	LM	Measured	PlateRow	BON	1.15258	-0.144084	1.00012	-0.00026041	23	5					21.7391
A2	BMI	LL	Green	A	Beta	LM	Measured	PlateRow	BON	0.903563	0.0637967	0.989792	0.00127343	8	7					87.5
A2	BMI	LLS	Green	A	Beta	LM	Measured	PlateRow	BON	0.943837	0.0622126	0.99667	0.00180494	13	7					53.8462
A2	BMI	NTR	Green	A	Beta	LM	Measured	PlateRow	BON	0.968957	-0.234701	1.00093	-0.00187967	15	7					46.6667
A2	BMI	Average	Green	A	Beta	LM	Measured	PlateRow	BON	NA	NA	NA	NA	14.75	6.5	1.5	0.5	5	7	52.438	30.6989	35.062	21.7391	87.5
A2	BMI	RS	Green	A	Beta	LM	Measured	PlateRow	FDR	1.15258	-0.144084	1.00012	-0.00026041	143	4					2.7972
A2	BMI	LL	Green	A	Beta	LM	Measured	PlateRow	FDR	0.903563	0.0637967	0.989792	0.00127343	28	10					35.7143
A2	BMI	LLS	Green	A	Beta	LM	Measured	PlateRow	FDR	0.943837	0.0622126	0.99667	0.00180494	137	9					6.56934
A2	BMI	NTR	Green	A	Beta	LM	Measured	PlateRow	FDR	0.968957	-0.234701	1.00093	-0.00187967	89	10					11.236
A2	BMI	Average	Green	A	Beta	LM	Measured	PlateRow	FDR	NA	NA	NA	NA	99.25	8.25	4.25	1.75	4	10	14.0792	11.282	21.6351	2.7972	35.7143
A2	Age	RS	Green	A	Beta	LM	Measured	PlateRow	BON	1.36785	-0.0923613	1.01049	-0.0061311	102084	2625					2.57141
A2	Age	LL	Green	A	Beta	LM	Measured	PlateRow	BON	0.984935	-0.261888	0.999579	-0.00286492	94063	50857					54.067
A2	Age	LLS	Green	A	Beta	LM	Measured	PlateRow	BON	1.09479	0.0229866	1.00036	0.004573	102925	8437					8.19723
A2	Age	NTR	Green	A	Beta	LM	Measured	PlateRow	BON	1.14905	-0.272548	0.999261	-0.00256048	64340	59826					92.9841
A2	Age	Average	Green	A	Beta	LM	Measured	PlateRow	BON	NA	NA	NA	NA	90853	30436.2	27811.2	29389.8	2625	59826	39.4549	36.8835	53.5292	2.57141	92.9841
A2	Age	RS	Green	A	Beta	LM	Measured	PlateRow	FDR	1.36785	-0.0923613	1.01049	-0.0061311	191143	2054					1.07459
A2	Age	LL	Green	A	Beta	LM	Measured	PlateRow	FDR	0.984935	-0.261888	0.999579	-0.00286492	186328	50975					27.3577
A2	Age	LLS	Green	A	Beta	LM	Measured	PlateRow	FDR	1.09479	0.0229866	1.00036	0.004573	192985	7622					3.94953
A2	Age	NTR	Green	A	Beta	LM	Measured	PlateRow	FDR	1.14905	-0.272548	0.999261	-0.00256048	151398	84295					55.6778
A2	Age	Average	Green	A	Beta	LM	Measured	PlateRow	FDR	NA	NA	NA	NA	180464	36236.5	34182.5	48058.5	2054	84295	22.0149	20.9403	33.6629	1.07459	55.6778
A1	Smoking	RS	Yellow	A	Beta-3IQR	LM	Measured	PlateRow	BON	1.0594	-0.158891	1.00236	-0.00236195	728	198					27.1978
A1	Smoking	LL	Yellow	A	Beta-3IQR	LM	Measured	PlateRow	BON	0.959318	-0.00534602	0.996103	0.00215328	590	279					47.2881
A1	Smoking	LLS	Yellow	A	Beta-3IQR	LM	Measured	PlateRow	BON	1.10029	-0.370308	1.00434	-0.00594238	844	168					19.9052
A1	Smoking	NTR	Yellow	A	Beta-3IQR	LM	Measured	PlateRow	BON	1.14565	0.23286	1.0103	0.0192644	772	220					28.4974
A1	Smoking	Average	Yellow	A	Beta-3IQR	LM	Measured	PlateRow	BON	NA	NA	NA	NA	733.5	216.25	48.25	62.75	168	279	30.7221	10.8169	16.566	19.9052	47.2881
A1	Smoking	RS	Yellow	A	Beta-3IQR	LM	Measured	PlateRow	FDR	1.0594	-0.158891	1.00236	-0.00236195	4669	213					4.562
A1	Smoking	LL	Yellow	A	Beta-3IQR	LM	Measured	PlateRow	FDR	0.959318	-0.00534602	0.996103	0.00215328	3818	323					8.45993
A1	Smoking	LLS	Yellow	A	Beta-3IQR	LM	Measured	PlateRow	FDR	1.10029	-0.370308	1.00434	-0.00594238	6227	134					2.15192
A1	Smoking	NTR	Yellow	A	Beta-3IQR	LM	Measured	PlateRow	FDR	1.14565	0.23286	1.0103	0.0192644	4962	222					4.474
A1	Smoking	Average	Yellow	A	Beta-3IQR	LM	Measured	PlateRow	FDR	NA	NA	NA	NA	4919	223	89	100	134	323	4.91196	2.76004	3.54796	2.15192	8.45993
A1	BMI	RS	Yellow	A	Beta-3IQR	LM	Measured	PlateRow	BON	1.1561	-0.170036	1.00011	-0.000301716	22	5					22.7273
A1	BMI	LL	Yellow	A	Beta-3IQR	LM	Measured	PlateRow	BON	0.916072	0.0454686	0.990119	-0.000876299	7	6					85.7143
A1	BMI	LLS	Yellow	A	Beta-3IQR	LM	Measured	PlateRow	BON	0.948647	0.0732979	0.99854	0.000978265	13	7					53.8462
A1	BMI	NTR	Yellow	A	Beta-3IQR	LM	Measured	PlateRow	BON	0.986207	-0.189398	1.00139	-0.00197586	15	7					46.6667
A1	BMI	Average	Yellow	A	Beta-3IQR	LM	Measured	PlateRow	BON	NA	NA	NA	NA	14.25	6.25	1.25	0.75	5	7	52.2386	29.5113	33.4757	22.7273	85.7143
A1	BMI	RS	Yellow	A	Beta-3IQR	LM	Measured	PlateRow	FDR	1.1561	-0.170036	1.00011	-0.000301716	116	4					3.44828
A1	BMI	LL	Yellow	A	Beta-3IQR	LM	Measured	PlateRow	FDR	0.916072	0.0454686	0.990119	-0.000876299	35	12					34.2857
A1	BMI	LLS	Yellow	A	Beta-3IQR	LM	Measured	PlateRow	FDR	0.948647	0.0732979	0.99854	0.000978265	149	9					6.04027
A1	BMI	NTR	Yellow	A	Beta-3IQR	LM	Measured	PlateRow	FDR	0.986207	-0.189398	1.00139	-0.00197586	100	9					9
A1	BMI	Average	Yellow	A	Beta-3IQR	LM	Measured	PlateRow	FDR	NA	NA	NA	NA	100	8.5	4.5	3.5	4	12	13.1936	9.74529	21.0921	3.44828	34.2857
A1	Age	RS	Yellow	A	Beta-3IQR	LM	Measured	PlateRow	BON	1.26015	-0.0780905	1.01386	-0.00696973	100058	4621					4.61832
A1	Age	LL	Yellow	A	Beta-3IQR	LM	Measured	PlateRow	BON	0.974135	-0.24106	0.999306	-0.00264119	93254	48889					52.4256
A1	Age	LLS	Yellow	A	Beta-3IQR	LM	Measured	PlateRow	BON	1.0611	0.141272	0.991457	0.0117252	101242	8501					8.39671
A1	Age	NTR	Yellow	A	Beta-3IQR	LM	Measured	PlateRow	BON	1.16843	-0.267867	0.999239	-0.00231283	63728	59087					92.7175
A1	Age	Average	Yellow	A	Beta-3IQR	LM	Measured	PlateRow	BON	NA	NA	NA	NA	89570.5	30274.5	25653.5	28812.5	4621	59087	39.5395	34.9212	53.1779	4.61832	92.7175
A1	Age	RS	Yellow	A	Beta-3IQR	LM	Measured	PlateRow	FDR	1.26015	-0.0780905	1.01386	-0.00696973	190313	3818					2.00617
A1	Age	LL	Yellow	A	Beta-3IQR	LM	Measured	PlateRow	FDR	0.974135	-0.24106	0.999306	-0.00264119	184090	48944					26.587
A1	Age	LLS	Yellow	A	Beta-3IQR	LM	Measured	PlateRow	FDR	1.0611	0.141272	0.991457	0.0117252	192891	7647					3.96442
A1	Age	NTR	Yellow	A	Beta-3IQR	LM	Measured	PlateRow	FDR	1.16843	-0.267867	0.999239	-0.00231283	152671	82343					53.9349
A1	Age	Average	Yellow	A	Beta-3IQR	LM	Measured	PlateRow	FDR	NA	NA	NA	NA	179991	35688	31870	46655	3818	82343	21.6231	19.617	32.3118	2.00617	53.9349
A4	Smoking	RS	Red	A	M	LM	Measured	PlateRow	BON	1.06598	-0.150794	1.00347	-0.00249722	741	206					27.8003
A4	Smoking	LL	Red	A	M	LM	Measured	PlateRow	BON	0.950709	0.0176745	0.993851	0.00454005	570	294					51.5789
A4	Smoking	LLS	Red	A	M	LM	Measured	PlateRow	BON	1.11927	-0.401756	1.00918	-0.0141817	898	167					18.5969
A4	Smoking	NTR	Red	A	M	LM	Measured	PlateRow	BON	1.12074	0.229642	1.12093	0.234679	813	217					26.6913
A4	Smoking	Average	Red	A	M	LM	Measured	PlateRow	BON	NA	NA	NA	NA	755.5	221	54	73	167	294	31.1668	12.57	20.4121	18.5969	51.5789
A4	Smoking	RS	Red	A	M	LM	Measured	PlateRow	FDR	1.06598	-0.150794	1.00347	-0.00249722	4801	204					4.24911
A4	Smoking	LL	Red	A	M	LM	Measured	PlateRow	FDR	0.950709	0.0176745	0.993851	0.00454005	3749	376					10.0293
A4	Smoking	LLS	Red	A	M	LM	Measured	PlateRow	FDR	1.11927	-0.401756	1.00918	-0.0141817	6399	128					2.00031
A4	Smoking	NTR	Red	A	M	LM	Measured	PlateRow	FDR	1.12074	0.229642	1.12093	0.234679	5160	224					4.34109
A4	Smoking	Average	Red	A	M	LM	Measured	PlateRow	FDR	NA	NA	NA	NA	5027.25	233	105	143	128	376	5.15496	3.15465	4.87438	2.00031	10.0293
A4	BMI	RS	Red	A	M	LM	Measured	PlateRow	BON	1.16011	-0.151257	1.00011	-0.000309844	18	5					27.7778
A4	BMI	LL	Red	A	M	LM	Measured	PlateRow	BON	0.918833	0.0596529	0.989669	-0.000649457	9	7					77.7778
A4	BMI	LLS	Red	A	M	LM	Measured	PlateRow	BON	0.937554	0.0607191	0.997702	0.00170901	13	7					53.8462
A4	BMI	NTR	Red	A	M	LM	Measured	PlateRow	BON	0.951996	-0.166156	1.00177	-0.00249337	13	7					53.8462
A4	BMI	Average	Red	A	M	LM	Measured	PlateRow	BON	NA	NA	NA	NA	13.25	6.5	1.5	0.5	5	7	53.312	25.5342	24.4658	27.7778	77.7778
A4	BMI	RS	Red	A	M	LM	Measured	PlateRow	FDR	1.16011	-0.151257	1.00011	-0.000309844	126	4					3.1746
A4	BMI	LL	Red	A	M	LM	Measured	PlateRow	FDR	0.918833	0.0596529	0.989669	-0.000649457	18	10					55.5556
A4	BMI	LLS	Red	A	M	LM	Measured	PlateRow	FDR	0.937554	0.0607191	0.997702	0.00170901	112	7					6.25
A4	BMI	NTR	Red	A	M	LM	Measured	PlateRow	FDR	0.951996	-0.166156	1.00177	-0.00249337	88	7					7.95455
A4	BMI	Average	Red	A	M	LM	Measured	PlateRow	FDR	NA	NA	NA	NA	86	7	3	3	4	10	18.2337	15.0591	37.3219	3.1746	55.5556
A4	Age	RS	Red	A	M	LM	Measured	PlateRow	BON	1.26636	-0.0597202	1.00714	-0.0048008	102670	4698					4.57583
A4	Age	LL	Red	A	M	LM	Measured	PlateRow	BON	0.99809	-0.279656	1.00071	-0.0030261	95777	49089					51.2534
A4	Age	LLS	Red	A	M	LM	Measured	PlateRow	BON	1.07147	0.0920723	1.00225	0.00240156	104565	9257					8.85287
A4	Age	NTR	Red	A	M	LM	Measured	PlateRow	BON	1.15511	-0.275549	0.999237	-0.00270816	65091	60796					93.4015
A4	Age	Average	Red	A	M	LM	Measured	PlateRow	BON	NA	NA	NA	NA	92025.8	30960	26262	29836	4698	60796	39.5209	34.9451	53.8806	4.57583	93.4015
A4	Age	RS	Red	A	M	LM	Measured	PlateRow	FDR	1.26636	-0.0597202	1.00714	-0.0048008	192300	3887					2.02132
A4	Age	LL	Red	A	M	LM	Measured	PlateRow	FDR	0.99809	-0.279656	1.00071	-0.0030261	187754	48980					26.0873
A4	Age	LLS	Red	A	M	LM	Measured	PlateRow	FDR	1.07147	0.0920723	1.00225	0.00240156	195427	8399					4.29777
A4	Age	NTR	Red	A	M	LM	Measured	PlateRow	FDR	1.15511	-0.275549	0.999237	-0.00270816	153734	85151					55.3885
A4	Age	Average	Red	A	M	LM	Measured	PlateRow	FDR	NA	NA	NA	NA	182304	36604.2	32717.2	48546.8	3887	85151	21.9487	19.9274	33.4398	2.02132	55.3885
A3	Smoking	RS	Blue	A	M-3IQR	LM	Measured	PlateRow	BON	1.06953	-0.159367	1.00328	-0.00156443	721	207					28.7101
A3	Smoking	LL	Blue	A	M-3IQR	LM	Measured	PlateRow	BON	0.959572	-8.37267e-05	0.997704	-0.00131068	579	286					49.3955
A3	Smoking	LLS	Blue	A	M-3IQR	LM	Measured	PlateRow	BON	1.10977	-0.394725	1.00375	-0.00728929	892	168					18.8341
A3	Smoking	NTR	Blue	A	M-3IQR	LM	Measured	PlateRow	BON	1.14896	0.237874	1.11025	0.207573	815	209					25.6442
A3	Smoking	Average	Blue	A	M-3IQR	LM	Measured	PlateRow	BON	NA	NA	NA	NA	751.75	217.5	49.5	68.5	168	286	30.646	11.8119	18.7495	18.8341	49.3955
A3	Smoking	RS	Blue	A	M-3IQR	LM	Measured	PlateRow	FDR	1.06953	-0.159367	1.00328	-0.00156443	4634	217					4.68278
A3	Smoking	LL	Blue	A	M-3IQR	LM	Measured	PlateRow	FDR	0.959572	-8.37267e-05	0.997704	-0.00131068	3796	359					9.45732
A3	Smoking	LLS	Blue	A	M-3IQR	LM	Measured	PlateRow	FDR	1.10977	-0.394725	1.00375	-0.00728929	6151	134					2.17851
A3	Smoking	NTR	Blue	A	M-3IQR	LM	Measured	PlateRow	FDR	1.14896	0.237874	1.11025	0.207573	5123	211					4.11868
A3	Smoking	Average	Blue	A	M-3IQR	LM	Measured	PlateRow	FDR	NA	NA	NA	NA	4926	230.25	96.25	128.75	134	359	5.10932	2.93082	4.348	2.17851	9.45732
A3	BMI	RS	Blue	A	M-3IQR	LM	Measured	PlateRow	BON	1.1608	-0.161592	1.00009	-0.00036352	19	5					26.3158
A3	BMI	LL	Blue	A	M-3IQR	LM	Measured	PlateRow	BON	0.920788	0.0538648	0.989317	-0.00271339	8	6					75
A3	BMI	LLS	Blue	A	M-3IQR	LM	Measured	PlateRow	BON	0.941639	0.0673532	0.99883	0.000810522	12	6					50
A3	BMI	NTR	Blue	A	M-3IQR	LM	Measured	PlateRow	BON	0.982997	-0.183645	1.00177	-0.00241658	14	6					42.8571
A3	BMI	Average	Blue	A	M-3IQR	LM	Measured	PlateRow	BON	NA	NA	NA	NA	13.25	5.75	0.75	0.25	5	6	48.5432	22.2274	26.4568	26.3158	75
A3	BMI	RS	Blue	A	M-3IQR	LM	Measured	PlateRow	FDR	1.1608	-0.161592	1.00009	-0.00036352	104	4					3.84615
A3	BMI	LL	Blue	A	M-3IQR	LM	Measured	PlateRow	FDR	0.920788	0.0538648	0.989317	-0.00271339	28	9					32.1429
A3	BMI	LLS	Blue	A	M-3IQR	LM	Measured	PlateRow	FDR	0.941639	0.0673532	0.99883	0.000810522	125	7					5.6
A3	BMI	NTR	Blue	A	M-3IQR	LM	Measured	PlateRow	FDR	0.982997	-0.183645	1.00177	-0.00241658	91	7					7.69231
A3	BMI	Average	Blue	A	M-3IQR	LM	Measured	PlateRow	FDR	NA	NA	NA	NA	87	6.75	2.75	2.25	4	9	12.3203	8.47418	19.8225	3.84615	32.1429
A3	Age	RS	Blue	A	M-3IQR	LM	Measured	PlateRow	BON	1.23907	-0.0573579	1.01057	-0.00625376	101657	5225					5.13983
A3	Age	LL	Blue	A	M-3IQR	LM	Measured	PlateRow	BON	0.989446	-0.287131	0.999228	-0.00377274	94686	48629					51.3582
A3	Age	LLS	Blue	A	M-3IQR	LM	Measured	PlateRow	BON	1.0662	0.15178	0.989679	0.00970954	103384	9154					8.85437
A3	Age	NTR	Blue	A	M-3IQR	LM	Measured	PlateRow	BON	1.15618	-0.283556	0.999676	-0.00264592	64892	60262					92.8651
A3	Age	Average	Blue	A	M-3IQR	LM	Measured	PlateRow	BON	NA	NA	NA	NA	91154.8	30817.5	25592.5	29444.5	5225	60262	39.5544	34.4145	53.3107	5.13983	92.8651
A3	Age	RS	Blue	A	M-3IQR	LM	Measured	PlateRow	FDR	1.23907	-0.0573579	1.01057	-0.00625376	191715	4292					2.23874
A3	Age	LL	Blue	A	M-3IQR	LM	Measured	PlateRow	FDR	0.989446	-0.287131	0.999228	-0.00377274	185984	48613					26.1383
A3	Age	LLS	Blue	A	M-3IQR	LM	Measured	PlateRow	FDR	1.0662	0.15178	0.989679	0.00970954	194914	8324					4.2706
A3	Age	NTR	Blue	A	M-3IQR	LM	Measured	PlateRow	FDR	1.15618	-0.283556	0.999676	-0.00264592	153930	83503					54.2474
A3	Age	Average	Blue	A	M-3IQR	LM	Measured	PlateRow	FDR	NA	NA	NA	NA	181636	36183	31891	47320	4292	83503	21.7237	19.485	32.5236	2.23874	54.2474
A5	Smoking	RS	Purple	A	RIN	LM	Measured	PlateRow	BON	1.06774	-0.164073	1.00437	-0.000528382	726	205					28.2369
A5	Smoking	LL	Purple	A	RIN	LM	Measured	PlateRow	BON	0.966969	-0.0151657	0.997803	0.000320434	578	279					48.2699
A5	Smoking	LLS	Purple	A	RIN	LM	Measured	PlateRow	BON	1.10871	-0.398953	1.00314	-0.0049385	898	168					18.7082
A5	Smoking	NTR	Purple	A	RIN	LM	Measured	PlateRow	BON	1.1706	0.278428	1.01848	0.0323639	811	213					26.2639
A5	Smoking	Average	Purple	A	RIN	LM	Measured	PlateRow	BON	NA	NA	NA	NA	753.25	216.25	48.25	62.75	168	279	30.3697	11.6615	17.9002	18.7082	48.2699
A5	Smoking	RS	Purple	A	RIN	LM	Measured	PlateRow	FDR	1.06774	-0.164073	1.00437	-0.000528382	4828	201					4.16321
A5	Smoking	LL	Purple	A	RIN	LM	Measured	PlateRow	FDR	0.966969	-0.0151657	0.997803	0.000320434	4037	355					8.79366
A5	Smoking	LLS	Purple	A	RIN	LM	Measured	PlateRow	FDR	1.10871	-0.398953	1.00314	-0.0049385	6322	123					1.94559
A5	Smoking	NTR	Purple	A	RIN	LM	Measured	PlateRow	FDR	1.1706	0.278428	1.01848	0.0323639	5148	206					4.00155
A5	Smoking	Average	Purple	A	RIN	LM	Measured	PlateRow	FDR	NA	NA	NA	NA	5083.75	221.25	98.25	133.75	123	355	4.726	2.78042	4.06766	1.94559	8.79366
A5	BMI	RS	Purple	A	RIN	LM	Measured	PlateRow	BON	1.15422	-0.168328	1.0001	-0.000296949	18	5					27.7778
A5	BMI	LL	Purple	A	RIN	LM	Measured	PlateRow	BON	0.928181	0.0382224	0.992549	-0.00274431	8	6					75
A5	BMI	LLS	Purple	A	RIN	LM	Measured	PlateRow	BON	0.936319	0.0647539	0.998846	0.000685571	13	6					46.1538
A5	BMI	NTR	Purple	A	RIN	LM	Measured	PlateRow	BON	0.987892	-0.191332	1.00336	-0.00482651	15	7					46.6667
A5	BMI	Average	Purple	A	RIN	LM	Measured	PlateRow	BON	NA	NA	NA	NA	13.5	6	1	1	5	7	48.8996	21.1218	26.1004	27.7778	75
A5	BMI	RS	Purple	A	RIN	LM	Measured	PlateRow	FDR	1.15422	-0.168328	1.0001	-0.000296949	130	4					3.07692
A5	BMI	LL	Purple	A	RIN	LM	Measured	PlateRow	FDR	0.928181	0.0382224	0.992549	-0.00274431	34	9					26.4706
A5	BMI	LLS	Purple	A	RIN	LM	Measured	PlateRow	FDR	0.936319	0.0647539	0.998846	0.000685571	126	8					6.34921
A5	BMI	NTR	Purple	A	RIN	LM	Measured	PlateRow	FDR	0.987892	-0.191332	1.00336	-0.00482651	81	6					7.40741
A5	BMI	Average	Purple	A	RIN	LM	Measured	PlateRow	FDR	NA	NA	NA	NA	92.75	6.75	2.75	2.25	4	9	10.826	7.74911	15.6446	3.07692	26.4706
A5	Age	RS	Purple	A	RIN	LM	Measured	PlateRow	BON	1.2132	-0.0381282	1.00734	-0.00531605	102087	5868					5.74804
A5	Age	LL	Purple	A	RIN	LM	Measured	PlateRow	BON	0.993494	-0.294337	0.999621	-0.00409056	96034	48121					50.1083
A5	Age	LLS	Purple	A	RIN	LM	Measured	PlateRow	BON	1.05261	0.166372	0.986587	0.0169406	104555	9102					8.70547
A5	Age	NTR	Purple	A	RIN	LM	Measured	PlateRow	BON	1.15743	-0.269536	0.998876	-0.00252459	66114	61361					92.8109
A5	Age	Average	Purple	A	RIN	LM	Measured	PlateRow	BON	NA	NA	NA	NA	92197.5	31113	25245	30248	5868	61361	39.3432	33.5951	53.4677	5.74804	92.8109
A5	Age	RS	Purple	A	RIN	LM	Measured	PlateRow	FDR	1.2132	-0.0381282	1.00734	-0.00531605	194153	4870					2.50833
A5	Age	LL	Purple	A	RIN	LM	Measured	PlateRow	FDR	0.993494	-0.294337	0.999621	-0.00409056	189481	47972					25.3176
A5	Age	LLS	Purple	A	RIN	LM	Measured	PlateRow	FDR	1.05261	0.166372	0.986587	0.0169406	197898	8298					4.19307
A5	Age	NTR	Purple	A	RIN	LM	Measured	PlateRow	FDR	1.15743	-0.269536	0.998876	-0.00252459	156970	84327					53.7217
A5	Age	Average	Purple	A	RIN	LM	Measured	PlateRow	FDR	NA	NA	NA	NA	184626	36366.8	31496.8	47960.2	4870	84327	21.4352	18.9268	32.2866	2.50833	53.7217
B2	Smoking	RS	Green	B	Beta-3IQR	LMM	Measured	PlateRow	BON	1.05215	-0.157028	1.00237	-0.00213928	801	214					26.7166
B2	Smoking	LL	Green	B	Beta-3IQR	LMM	Measured	PlateRow	BON	0.96209	0.0124276	0.997987	-0.00168209	653	297					45.4824
B2	Smoking	LLS	Green	B	Beta-3IQR	LMM	Measured	PlateRow	BON	1.08862	-0.377795	1.00501	-0.00829828	956	187					19.5607
B2	Smoking	NTR	Green	B	Beta-3IQR	LMM	Measured	PlateRow	BON	1.16912	0.216325	1.02091	0.0380472	824	237					28.7621
B2	Smoking	Average	Green	B	Beta-3IQR	LMM	Measured	PlateRow	BON	NA	NA	NA	NA	808.5	233.75	46.75	63.25	187	297	30.1304	10.5698	15.3519	19.5607	45.4824
B2	Smoking	RS	Green	B	Beta-3IQR	LMM	Measured	PlateRow	FDR	1.05215	-0.157028	1.00237	-0.00213928	5328	214					4.01652
B2	Smoking	LL	Green	B	Beta-3IQR	LMM	Measured	PlateRow	FDR	0.96209	0.0124276	0.997987	-0.00168209	4410	331					7.50567
B2	Smoking	LLS	Green	B	Beta-3IQR	LMM	Measured	PlateRow	FDR	1.08862	-0.377795	1.00501	-0.00829828	6870	153					2.22707
B2	Smoking	NTR	Green	B	Beta-3IQR	LMM	Measured	PlateRow	FDR	1.16912	0.216325	1.02091	0.0380472	5451	243					4.4579
B2	Smoking	Average	Green	B	Beta-3IQR	LMM	Measured	PlateRow	FDR	NA	NA	NA	NA	5514.75	235.25	82.25	95.75	153	331	4.55179	2.32472	2.95388	2.22707	7.50567
B2	BMI	RS	Green	B	Beta-3IQR	LMM	Measured	PlateRow	BON	1.15596	-0.178455	1.00029	0.00223084	25	5					20
B2	BMI	LL	Green	B	Beta-3IQR	LMM	Measured	PlateRow	BON	0.918986	0.0548723	0.992221	0.00167841	8	7					87.5
B2	BMI	LLS	Green	B	Beta-3IQR	LMM	Measured	PlateRow	BON	0.953403	0.0618671	0.998712	-0.000376875	16	8					50
B2	BMI	NTR	Green	B	Beta-3IQR	LMM	Measured	PlateRow	BON	0.95758	-0.0726984	1.00212	-0.00647189	16	7					43.75
B2	BMI	Average	Green	B	Beta-3IQR	LMM	Measured	PlateRow	BON	NA	NA	NA	NA	16.25	6.75	1.75	1.25	5	8	50.3125	30.3125	37.1875	20	87.5
B2	BMI	RS	Green	B	Beta-3IQR	LMM	Measured	PlateRow	FDR	1.15596	-0.178455	1.00029	0.00223084	164	4					2.43902
B2	BMI	LL	Green	B	Beta-3IQR	LMM	Measured	PlateRow	FDR	0.918986	0.0548723	0.992221	0.00167841	54	14					25.9259
B2	BMI	LLS	Green	B	Beta-3IQR	LMM	Measured	PlateRow	FDR	0.953403	0.0618671	0.998712	-0.000376875	206	9					4.36893
B2	BMI	NTR	Green	B	Beta-3IQR	LMM	Measured	PlateRow	FDR	0.95758	-0.0726984	1.00212	-0.00647189	99	10					10.101
B2	BMI	Average	Green	B	Beta-3IQR	LMM	Measured	PlateRow	FDR	NA	NA	NA	NA	130.75	9.25	5.25	4.75	4	14	10.7087	8.2697	15.2172	2.43902	25.9259
B2	Age	RS	Green	B	Beta-3IQR	LMM	Measured	PlateRow	BON	1.27408	-0.0491966	1.00719	-0.00222573	99229	5433					5.47521
B2	Age	LL	Green	B	Beta-3IQR	LMM	Measured	PlateRow	BON	0.975695	-0.256094	1.00147	-0.00183317	92145	48797					52.9568
B2	Age	LLS	Green	B	Beta-3IQR	LMM	Measured	PlateRow	BON	1.07403	0.155437	0.999463	0.0112239	100398	8455					8.42148
B2	Age	NTR	Green	B	Beta-3IQR	LMM	Measured	PlateRow	BON	1.20464	-0.204892	0.997985	-0.000612817	63815	59080					92.5801
B2	Age	Average	Green	B	Beta-3IQR	LMM	Measured	PlateRow	BON	NA	NA	NA	NA	88896.8	30441.2	25008.2	28638.8	5433	59080	39.8584	34.3832	52.7217	5.47521	92.5801
B2	Age	RS	Green	B	Beta-3IQR	LMM	Measured	PlateRow	FDR	1.27408	-0.0491966	1.00719	-0.00222573	188020	4506					2.39655
B2	Age	LL	Green	B	Beta-3IQR	LMM	Measured	PlateRow	FDR	0.975695	-0.256094	1.00147	-0.00183317	181075	48879					26.9938
B2	Age	LLS	Green	B	Beta-3IQR	LMM	Measured	PlateRow	FDR	1.07403	0.155437	0.999463	0.0112239	189995	7610					4.00537
B2	Age	NTR	Green	B	Beta-3IQR	LMM	Measured	PlateRow	FDR	1.20464	-0.204892	0.997985	-0.000612817	152307	80967					53.1604
B2	Age	Average	Green	B	Beta-3IQR	LMM	Measured	PlateRow	FDR	NA	NA	NA	NA	177849	35490.5	30984.5	45476.5	4506	80967	21.639	19.2425	31.5214	2.39655	53.1604
B3	Smoking	RS	Red	B	Beta-3IQR	RLMM	Measured	PlateRow	BON	1.06231	-0.179907	1.00256	-0.00256327	799	216					27.0338
B3	Smoking	LL	Red	B	Beta-3IQR	RLMM	Measured	PlateRow	BON	0.984178	-0.0298902	0.99909	-0.00242262	667	264					39.5802
B3	Smoking	LLS	Red	B	Beta-3IQR	RLMM	Measured	PlateRow	BON	1.07725	-0.355244	1.00465	-0.00914583	935	191					20.4278
B3	Smoking	NTR	Red	B	Beta-3IQR	RLMM	Measured	PlateRow	BON	1.17929	0.217965	1.02184	0.0397804	810	229					28.2716
B3	Smoking	Average	Red	B	Beta-3IQR	RLMM	Measured	PlateRow	BON	NA	NA	NA	NA	802.75	225	34	39	191	264	28.8284	8.40055	10.7519	20.4278	39.5802
B3	Smoking	RS	Red	B	Beta-3IQR	RLMM	Measured	PlateRow	FDR	1.06231	-0.179907	1.00256	-0.00256327	5343	221					4.13625
B3	Smoking	LL	Red	B	Beta-3IQR	RLMM	Measured	PlateRow	FDR	0.984178	-0.0298902	0.99909	-0.00242262	4656	284					6.09966
B3	Smoking	LLS	Red	B	Beta-3IQR	RLMM	Measured	PlateRow	FDR	1.07725	-0.355244	1.00465	-0.00914583	6523	166					2.54484
B3	Smoking	NTR	Red	B	Beta-3IQR	RLMM	Measured	PlateRow	FDR	1.17929	0.217965	1.02184	0.0397804	5510	234					4.24682
B3	Smoking	Average	Red	B	Beta-3IQR	RLMM	Measured	PlateRow	FDR	NA	NA	NA	NA	5508	226.25	60.25	57.75	166	284	4.25689	1.71205	1.84276	2.54484	6.09966
B3	Age	RS	Red	B	Beta-3IQR	RLMM	Measured	PlateRow	BON	1.23646	0.00154357	1.01007	-0.000347119	97013	5106					5.26321
B3	Age	LL	Red	B	Beta-3IQR	RLMM	Measured	PlateRow	BON	0.979179	-0.298529	0.997928	-0.00159945	88881	46172					51.9481
B3	Age	LLS	Red	B	Beta-3IQR	RLMM	Measured	PlateRow	BON	1.10284	0.189275	0.995445	0.0102939	98461	6651					6.75496
B3	Age	NTR	Red	B	Beta-3IQR	RLMM	Measured	PlateRow	BON	1.23558	-0.230967	0.998461	-0.00128365	60785	55569					91.4189
B3	Age	Average	Red	B	Beta-3IQR	RLMM	Measured	PlateRow	BON	NA	NA	NA	NA	86285	28374.5	23268.5	27194.5	5106	55569	38.8463	33.5831	52.5726	5.26321	91.4189
B3	Age	RS	Red	B	Beta-3IQR	RLMM	Measured	PlateRow	FDR	1.23646	0.00154357	1.01007	-0.000347119	188605	4196					2.22476
B3	Age	LL	Red	B	Beta-3IQR	RLMM	Measured	PlateRow	FDR	0.979179	-0.298529	0.997928	-0.00159945	180268	46629					25.8665
B3	Age	LLS	Red	B	Beta-3IQR	RLMM	Measured	PlateRow	FDR	1.10284	0.189275	0.995445	0.0102939	191110	5932					3.10397
B3	Age	NTR	Red	B	Beta-3IQR	RLMM	Measured	PlateRow	FDR	1.23558	-0.230967	0.998461	-0.00128365	152095	77980					51.2706
B3	Age	Average	Red	B	Beta-3IQR	RLMM	Measured	PlateRow	FDR	NA	NA	NA	NA	178020	33684.2	29488.2	44295.8	4196	77980	20.6165	18.3917	30.6541	2.22476	51.2706
D3	Smoking	RS	Green	D	Beta-3IQR	LM	Measured	Model2	BON	1.12905	0.0541611	1.00661	-0.00287733	1070	302					28.2243
D3	Smoking	LL	Green	D	Beta-3IQR	LM	Measured	Model2	BON	0.946515	0.0979782	0.996067	0.00254783	1022	342					33.4638
D3	Smoking	LLS	Green	D	Beta-3IQR	LM	Measured	Model2	BON	1.08422	0.180033	1.00318	0.000676254	1314	234					17.8082
D3	Smoking	NTR	Green	D	Beta-3IQR	LM	Measured	Model2	BON	1.15064	-0.0863641	1.0067	-0.00248636	984	365					37.0935
D3	Smoking	Average	Green	D	Beta-3IQR	LM	Measured	Model2	BON	NA	NA	NA	NA	1097.5	310.75	76.75	54.25	234	365	29.1475	11.3392	7.94604	17.8082	37.0935
D3	Smoking	RS	Green	D	Beta-3IQR	LM	Measured	Model2	FDR	1.12905	0.0541611	1.00661	-0.00287733	7411	260					3.5083
D3	Smoking	LL	Green	D	Beta-3IQR	LM	Measured	Model2	FDR	0.946515	0.0979782	0.996067	0.00254783	7280	317					4.3544
D3	Smoking	LLS	Green	D	Beta-3IQR	LM	Measured	Model2	FDR	1.08422	0.180033	1.00318	0.000676254	9010	180					1.99778
D3	Smoking	NTR	Green	D	Beta-3IQR	LM	Measured	Model2	FDR	1.15064	-0.0863641	1.0067	-0.00248636	7246	356					4.91306
D3	Smoking	Average	Green	D	Beta-3IQR	LM	Measured	Model2	FDR	NA	NA	NA	NA	7736.75	278.25	98.25	77.75	180	356	3.69338	1.6956	1.21967	1.99778	4.91306
D3	BMI	RS	Green	D	Beta-3IQR	LM	Measured	Model2	BON	1.00857	-0.0672971	0.999865	-0.000369052	55	8					14.5455
D3	BMI	LL	Green	D	Beta-3IQR	LM	Measured	Model2	BON	0.853404	-0.176505	0.972158	-0.0627817	28	15					53.5714
D3	BMI	LLS	Green	D	Beta-3IQR	LM	Measured	Model2	BON	1.01224	-0.0893479	0.999513	-0.00155256	34	13					38.2353
D3	BMI	NTR	Green	D	Beta-3IQR	LM	Measured	Model2	BON	1.01928	-0.0445877	1.00123	-0.00149677	39	9					23.0769
D3	BMI	Average	Green	D	Beta-3IQR	LM	Measured	Model2	BON	NA	NA	NA	NA	39	11.25	3.25	3.75	8	15	32.3573	17.8118	21.2142	14.5455	53.5714
D3	BMI	RS	Green	D	Beta-3IQR	LM	Measured	Model2	FDR	1.00857	-0.0672971	0.999865	-0.000369052	601	8					1.33111
D3	BMI	LL	Green	D	Beta-3IQR	LM	Measured	Model2	FDR	0.853404	-0.176505	0.972158	-0.0627817	184	21					11.413
D3	BMI	LLS	Green	D	Beta-3IQR	LM	Measured	Model2	FDR	1.01224	-0.0893479	0.999513	-0.00155256	451	14					3.10421
D3	BMI	NTR	Green	D	Beta-3IQR	LM	Measured	Model2	FDR	1.01928	-0.0445877	1.00123	-0.00149677	622	9					1.44695
D3	BMI	Average	Green	D	Beta-3IQR	LM	Measured	Model2	FDR	NA	NA	NA	NA	464.5	13	5	8	8	21	4.32383	2.99271	7.08921	1.33111	11.413
D3	Age	RS	Green	D	Beta-3IQR	LM	Measured	Model2	BON	1.50318	0.201489	1.02984	-0.00190379	41605	273					0.656171
D3	Age	LL	Green	D	Beta-3IQR	LM	Measured	Model2	BON	1.00531	-0.386031	0.998266	-0.00236152	13194	11435					86.6682
D3	Age	LLS	Green	D	Beta-3IQR	LM	Measured	Model2	BON	1.15871	0.279249	1.00799	0.0102712	41227	2396					5.81173
D3	Age	NTR	Green	D	Beta-3IQR	LM	Measured	Model2	BON	1.46345	0.345486	1.01952	0.00304168	37847	9981					26.372
D3	Age	Average	Green	D	Beta-3IQR	LM	Measured	Model2	BON	NA	NA	NA	NA	33468.2	6021.25	5748.25	5413.75	273	11435	29.877	29.2208	56.7912	0.656171	86.6682
D3	Age	RS	Green	D	Beta-3IQR	LM	Measured	Model2	FDR	1.50318	0.201489	1.02984	-0.00190379	113260	223					0.196892
D3	Age	LL	Green	D	Beta-3IQR	LM	Measured	Model2	FDR	1.00531	-0.386031	0.998266	-0.00236152	50129	25752					51.3715
D3	Age	LLS	Green	D	Beta-3IQR	LM	Measured	Model2	FDR	1.15871	0.279249	1.00799	0.0102712	114438	2062					1.80185
D3	Age	NTR	Green	D	Beta-3IQR	LM	Measured	Model2	FDR	1.46345	0.345486	1.01952	0.00304168	111675	9723					8.70651
D3	Age	Average	Green	D	Beta-3IQR	LM	Measured	Model2	FDR	NA	NA	NA	NA	97375.5	9440	9217	16312	223	25752	15.5192	15.3223	35.8523	0.196892	51.3715
B3	BMI	RS	Red	B	Beta-3IQR	RLMM	Measured	PlateRow	BON	1.16622	-0.205337	1.00024	0.00221573	23	6					26.087
B3	BMI	LL	Red	B	Beta-3IQR	RLMM	Measured	PlateRow	BON	0.930033	0.0372978	0.992936	0.000952771	8	7					87.5
B3	BMI	LLS	Red	B	Beta-3IQR	RLMM	Measured	PlateRow	BON	0.958562	0.0314237	0.998304	-0.000200942	14	6					42.8571
B3	BMI	NTR	Red	B	Beta-3IQR	RLMM	Measured	PlateRow	BON	1.02229	-0.133887	1.00538	-0.00515247	14	6					42.8571
B3	BMI	Average	Red	B	Beta-3IQR	RLMM	Measured	PlateRow	BON	NA	NA	NA	NA	14.75	6.25	0.25	0.75	6	7	49.8253	23.7384	37.6747	26.087	87.5
B3	BMI	RS	Red	B	Beta-3IQR	RLMM	Measured	PlateRow	FDR	1.16622	-0.205337	1.00024	0.00221573	127	4					3.14961
B3	BMI	LL	Red	B	Beta-3IQR	RLMM	Measured	PlateRow	FDR	0.930033	0.0372978	0.992936	0.000952771	29	11					37.931
B3	BMI	LLS	Red	B	Beta-3IQR	RLMM	Measured	PlateRow	FDR	0.958562	0.0314237	0.998304	-0.000200942	178	5					2.80899
B3	BMI	NTR	Red	B	Beta-3IQR	RLMM	Measured	PlateRow	FDR	1.02229	-0.133887	1.00538	-0.00515247	110	7					6.36364
B3	BMI	Average	Red	B	Beta-3IQR	RLMM	Measured	PlateRow	FDR	NA	NA	NA	NA	111	6.75	2.75	4.25	4	11	12.5633	9.75433	25.3677	2.80899	37.931
C4	Smoking	RS	Blue	C	Beta-3IQR	LM	None	PlateRow	FDR	0.982499	-0.189448	0.997544	-0.0029887	3618	298					8.23659
C4	Smoking	LL	Blue	C	Beta-3IQR	LM	None	PlateRow	FDR	0.944604	-0.00492998	0.996897	-0.00124219	3503	302					8.62118
C4	Smoking	LLS	Blue	C	Beta-3IQR	LM	None	PlateRow	FDR	1.05225	-0.33572	1.00211	-0.00748831	4591	145					3.15835
C4	Smoking	NTR	Blue	C	Beta-3IQR	LM	None	PlateRow	FDR	1.13804	0.270121	1.00109	-0.00193274	5608	154					2.74608
C4	Smoking	Average	Blue	C	Beta-3IQR	LM	None	PlateRow	FDR	NA	NA	NA	NA	4330	224.75	79.75	77.25	145	302	5.69055	2.94447	2.93063	2.74608	8.62118
C4	Smoking	RS	Blue	C	Beta-3IQR	LM	None	PlateRow	BON	0.982499	-0.189448	0.997544	-0.0029887	603	241					39.9668
C4	Smoking	LL	Blue	C	Beta-3IQR	LM	None	PlateRow	BON	0.944604	-0.00492998	0.996897	-0.00124219	559	273					48.8372
C4	Smoking	LLS	Blue	C	Beta-3IQR	LM	None	PlateRow	BON	1.05225	-0.33572	1.00211	-0.00748831	783	181					23.1162
C4	Smoking	NTR	Blue	C	Beta-3IQR	LM	None	PlateRow	BON	1.13804	0.270121	1.00109	-0.00193274	823	181					21.9927
C4	Smoking	Average	Blue	C	Beta-3IQR	LM	None	PlateRow	BON	NA	NA	NA	NA	692	219	38	54	181	273	33.4782	11.4855	15.359	21.9927	48.8372
C4	BMI	RS	Blue	C	Beta-3IQR	LM	None	PlateRow	FDR	1.05182	-0.204492	1.00017	0.00168932	105	4					3.80952
C4	BMI	LL	Blue	C	Beta-3IQR	LM	None	PlateRow	FDR	0.966641	-0.0424793	0.99714	-0.00259727	22	8					36.3636
C4	BMI	LLS	Blue	C	Beta-3IQR	LM	None	PlateRow	FDR	0.941117	0.0995066	0.997911	0.00126861	142	8					5.6338
C4	BMI	NTR	Blue	C	Beta-3IQR	LM	None	PlateRow	FDR	0.963517	-0.180148	1.00042	-0.00102026	83	9					10.8434
C4	BMI	Average	Blue	C	Beta-3IQR	LM	None	PlateRow	FDR	NA	NA	NA	NA	88	7.25	3.25	1.75	4	9	14.1626	10.3531	22.2011	3.80952	36.3636
C4	BMI	RS	Blue	C	Beta-3IQR	LM	None	PlateRow	BON	1.05182	-0.204492	1.00017	0.00168932	18	6					33.3333
C4	BMI	LL	Blue	C	Beta-3IQR	LM	None	PlateRow	BON	0.966641	-0.0424793	0.99714	-0.00259727	9	6					66.6667
C4	BMI	LLS	Blue	C	Beta-3IQR	LM	None	PlateRow	BON	0.941117	0.0995066	0.997911	0.00126861	21	6					28.5714
C4	BMI	NTR	Blue	C	Beta-3IQR	LM	None	PlateRow	BON	0.963517	-0.180148	1.00042	-0.00102026	14	7					50
C4	BMI	Average	Blue	C	Beta-3IQR	LM	None	PlateRow	BON	NA	NA	NA	NA	15.5	6.25	0.25	0.75	6	7	44.6429	16.0714	22.0238	28.5714	66.6667
C4	Age	RS	Blue	C	Beta-3IQR	LM	None	PlateRow	BON	1.20027	-0.0426621	1.01654	0.00307225	92224	3444					3.73439
C4	Age	LL	Blue	C	Beta-3IQR	LM	None	PlateRow	BON	0.93569	-0.27065	0.999176	-0.00311212	80949	44565					55.0532
C4	Age	LLS	Blue	C	Beta-3IQR	LM	None	PlateRow	BON	1.15329	0.0509722	1.0081	-0.00249965	93612	2925					3.1246
C4	Age	NTR	Blue	C	Beta-3IQR	LM	None	PlateRow	BON	1.13966	-0.286407	0.998454	-0.000882174	54502	49744					91.27
C4	Age	Average	Blue	C	Beta-3IQR	LM	None	PlateRow	BON	NA	NA	NA	NA	80321.8	25169.5	22244.5	24574.5	2925	49744	38.2956	35.171	52.9745	3.1246	91.27
C4	Age	RS	Blue	C	Beta-3IQR	LM	None	PlateRow	FDR	1.20027	-0.0426621	1.01654	0.00307225	188085	2981					1.58492
C4	Age	LL	Blue	C	Beta-3IQR	LM	None	PlateRow	FDR	0.93569	-0.27065	0.999176	-0.00311212	180946	45296					25.0329
C4	Age	LLS	Blue	C	Beta-3IQR	LM	None	PlateRow	FDR	1.15329	0.0509722	1.0081	-0.00249965	191998	2550					1.32814
C4	Age	NTR	Blue	C	Beta-3IQR	LM	None	PlateRow	FDR	1.13966	-0.286407	0.998454	-0.000882174	146373	72868					49.7824
C4	Age	Average	Blue	C	Beta-3IQR	LM	None	PlateRow	FDR	NA	NA	NA	NA	176850	30923.8	28373.8	41944.2	2550	72868	19.4321	18.1039	30.3503	1.32814	49.7824
C2	Age	RS	Green	C	Beta-3IQR	LM	Houseman6	PlateRow	BON	1.47922	0.216262	1.02869	0.00184818	64033	753					1.17596
C2	Age	LL	Green	C	Beta-3IQR	LM	Houseman6	PlateRow	BON	1.41805	0.0394992	1.00102	0.000891321	52604	29342					55.779
C2	Age	LLS	Green	C	Beta-3IQR	LM	Houseman6	PlateRow	BON	1.17409	0.205306	1.00456	0.00424843	62913	7406					11.7718
C2	Age	NTR	Green	C	Beta-3IQR	LM	Houseman6	PlateRow	BON	1.80838	0.180119	0.990798	-0.00219334	41259	35969					87.1786
C2	Age	Average	Green	C	Beta-3IQR	LM	Houseman6	PlateRow	BON	NA	NA	NA	NA	55202.2	18367.5	17614.5	17601.5	753	35969	38.9763	37.8004	48.2022	1.17596	87.1786
C2	Age	RS	Green	C	Beta-3IQR	LM	Houseman6	PlateRow	FDR	1.47922	0.216262	1.02869	0.00184818	155650	561					0.360424
C2	Age	LL	Green	C	Beta-3IQR	LM	Houseman6	PlateRow	FDR	1.41805	0.0394992	1.00102	0.000891321	140862	28308					20.0963
C2	Age	LLS	Green	C	Beta-3IQR	LM	Houseman6	PlateRow	FDR	1.17409	0.205306	1.00456	0.00424843	156495	6392					4.08448
C2	Age	NTR	Green	C	Beta-3IQR	LM	Houseman6	PlateRow	FDR	1.80838	0.180119	0.990798	-0.00219334	117226	43227					36.8749
C2	Age	Average	Green	C	Beta-3IQR	LM	Houseman6	PlateRow	FDR	NA	NA	NA	NA	142558	19622	19061	23605	561	43227	15.354	14.9936	21.5209	0.360424	36.8749
C2	Smoking	RS	Green	C	Beta-3IQR	LM	Houseman6	PlateRow	BON	1.0879	-0.11241	1.00573	-0.00525853	652	245					37.5767
C2	Smoking	LL	Green	C	Beta-3IQR	LM	Houseman6	PlateRow	BON	0.984598	-0.265925	0.997499	-0.00294404	672	270					40.1786
C2	Smoking	LLS	Green	C	Beta-3IQR	LM	Houseman6	PlateRow	BON	1.08324	-0.401139	1.00319	-0.00838086	717	215					29.9861
C2	Smoking	NTR	Green	C	Beta-3IQR	LM	Houseman6	PlateRow	BON	1.1279	0.137635	1.04259	0.065195	778	240					30.8483
C2	Smoking	Average	Green	C	Beta-3IQR	LM	Houseman6	PlateRow	BON	NA	NA	NA	NA	704.75	242.5	27.5	27.5	215	270	34.6474	4.66136	5.53116	29.9861	40.1786
C2	Smoking	RS	Green	C	Beta-3IQR	LM	Houseman6	PlateRow	FDR	1.0879	-0.11241	1.00573	-0.00525853	4203	236					5.61504
C2	Smoking	LL	Green	C	Beta-3IQR	LM	Houseman6	PlateRow	FDR	0.984598	-0.265925	0.997499	-0.00294404	4509	252					5.58882
C2	Smoking	LLS	Green	C	Beta-3IQR	LM	Houseman6	PlateRow	FDR	1.08324	-0.401139	1.00319	-0.00838086	5740	168					2.92683
C2	Smoking	NTR	Green	C	Beta-3IQR	LM	Houseman6	PlateRow	FDR	1.1279	0.137635	1.04259	0.065195	5698	207					3.63285
C2	Smoking	Average	Green	C	Beta-3IQR	LM	Houseman6	PlateRow	FDR	NA	NA	NA	NA	5037.5	215.75	47.75	36.25	168	252	4.44089	1.51406	1.17415	2.92683	5.61504
C2	BMI	RS	Green	C	Beta-3IQR	LM	Houseman6	PlateRow	FDR	1.03897	-0.0554742	1.08499	-0.0117807	577	14					2.42634
C2	BMI	LL	Green	C	Beta-3IQR	LM	Houseman6	PlateRow	FDR	0.971942	0.11856	0.99555	0.00429026	3738	11					0.294275
C2	BMI	LLS	Green	C	Beta-3IQR	LM	Houseman6	PlateRow	FDR	1.07823	0.0490161	1.00369	0.00416869	1262	5					0.396197
C2	BMI	NTR	Green	C	Beta-3IQR	LM	Houseman6	PlateRow	FDR	0.984209	-0.221092	1.02546	-0.0398079	1846	7					0.379198
C2	BMI	Average	Green	C	Beta-3IQR	LM	Houseman6	PlateRow	FDR	NA	NA	NA	NA	1855.75	9.25	4.25	4.75	5	14	0.874003	0.579728	1.55234	0.294275	2.42634
C2	BMI	RS	Green	C	Beta-3IQR	LM	Houseman6	PlateRow	BON	1.03897	-0.0554742	1.08499	-0.0117807	37	8					21.6216
C2	BMI	LL	Green	C	Beta-3IQR	LM	Houseman6	PlateRow	BON	0.971942	0.11856	0.99555	0.00429026	38	11					28.9474
C2	BMI	LLS	Green	C	Beta-3IQR	LM	Houseman6	PlateRow	BON	1.07823	0.0490161	1.00369	0.00416869	58	9					15.5172
C2	BMI	NTR	Green	C	Beta-3IQR	LM	Houseman6	PlateRow	BON	0.984209	-0.221092	1.02546	-0.0398079	61	9					14.7541
C2	BMI	Average	Green	C	Beta-3IQR	LM	Houseman6	PlateRow	BON	NA	NA	NA	NA	48.5	9.25	1.25	1.75	8	11	20.2101	5.45598	8.73729	14.7541	28.9474
C3	Age	RS	Red	C	Beta-3IQR	LM	Houseman3	PlateRow	FDR	1.58751	0.215727	1.05849	0.018344	142615	256					0.179504
C3	Age	LL	Red	C	Beta-3IQR	LM	Houseman3	PlateRow	FDR	1.60252	0.208392	1.02481	-0.0265613	137283	14714					10.718
C3	Age	LLS	Red	C	Beta-3IQR	LM	Houseman3	PlateRow	FDR	1.27796	0.161826	1.00784	0.00247118	144602	3495					2.41698
C3	Age	NTR	Red	C	Beta-3IQR	LM	Houseman3	PlateRow	FDR	2.05866	0.0604143	1.00516	-0.00514201	108623	25782					23.7353
C3	Age	Average	Red	C	Beta-3IQR	LM	Houseman3	PlateRow	FDR	NA	NA	NA	NA	133281	11061.8	10805.8	14720.2	256	25782	9.26245	9.08294	14.4729	0.179504	23.7353
C3	Age	RS	Red	C	Beta-3IQR	LM	Houseman3	PlateRow	BON	1.58751	0.215727	1.05849	0.018344	46489	413					0.888382
C3	Age	LL	Red	C	Beta-3IQR	LM	Houseman3	PlateRow	BON	1.60252	0.208392	1.02481	-0.0265613	41213	15728					38.1627
C3	Age	LLS	Red	C	Beta-3IQR	LM	Houseman3	PlateRow	BON	1.27796	0.161826	1.00784	0.00247118	44644	4409					9.87591
C3	Age	NTR	Red	C	Beta-3IQR	LM	Houseman3	PlateRow	BON	2.05866	0.0604143	1.00516	-0.00514201	27239	22161					81.3576
C3	Age	Average	Red	C	Beta-3IQR	LM	Houseman3	PlateRow	BON	NA	NA	NA	NA	39896.2	10677.8	10264.8	11483.2	413	22161	32.5712	31.6828	48.7865	0.888382	81.3576
C3	BMI	RS	Red	C	Beta-3IQR	LM	Houseman3	PlateRow	FDR	1.04164	-0.0289008	1.00163	0.00321293	258	9					3.48837
C3	BMI	LL	Red	C	Beta-3IQR	LM	Houseman3	PlateRow	FDR	0.953821	0.0946176	0.994136	0.00385583	102	19					18.6275
C3	BMI	LLS	Red	C	Beta-3IQR	LM	Houseman3	PlateRow	FDR	0.970238	0.0876423	0.999473	-0.000334195	262	11					4.19847
C3	BMI	NTR	Red	C	Beta-3IQR	LM	Houseman3	PlateRow	FDR	1.00705	-0.25249	1.00231	-0.0024344	279	6					2.15054
C3	BMI	Average	Red	C	Beta-3IQR	LM	Houseman3	PlateRow	FDR	NA	NA	NA	NA	225.25	11.25	5.25	7.75	6	19	7.11621	4.96567	11.5112	2.15054	18.6275
C3	BMI	RS	Red	C	Beta-3IQR	LM	Houseman3	PlateRow	BON	1.04164	-0.0289008	1.00163	0.00321293	28	8					28.5714
C3	BMI	LL	Red	C	Beta-3IQR	LM	Houseman3	PlateRow	BON	0.953821	0.0946176	0.994136	0.00385583	12	10					83.3333
C3	BMI	LLS	Red	C	Beta-3IQR	LM	Houseman3	PlateRow	BON	0.970238	0.0876423	0.999473	-0.000334195	32	8					25
C3	BMI	NTR	Red	C	Beta-3IQR	LM	Houseman3	PlateRow	BON	1.00705	-0.25249	1.00231	-0.0024344	28	11					39.2857
C3	BMI	Average	Red	C	Beta-3IQR	LM	Houseman3	PlateRow	BON	NA	NA	NA	NA	25	9.25	1.25	1.75	8	11	44.0476	19.0476	39.2857	25	83.3333
C3	Smoking	RS	Red	C	Beta-3IQR	LM	Houseman3	PlateRow	FDR	1.0444	-0.101515	1.00257	-0.00227211	5523	293					5.30509
C3	Smoking	LL	Red	C	Beta-3IQR	LM	Houseman3	PlateRow	FDR	1.00762	-0.0607057	1.0006	-0.00345457	4765	417					8.75131
C3	Smoking	LLS	Red	C	Beta-3IQR	LM	Houseman3	PlateRow	FDR	1.1059	-0.349427	1.00538	-0.00875624	6605	154					2.33157
C3	Smoking	NTR	Red	C	Beta-3IQR	LM	Houseman3	PlateRow	FDR	1.10783	0.279617	1.00918	0.00860521	6435	232					3.60528
C3	Smoking	Average	Red	C	Beta-3IQR	LM	Houseman3	PlateRow	FDR	NA	NA	NA	NA	5832	274	120	143	154	417	4.99831	2.66675	3.753	2.33157	8.75131
C3	Smoking	RS	Red	C	Beta-3IQR	LM	Houseman3	PlateRow	BON	1.0444	-0.101515	1.00257	-0.00227211	896	272					30.3571
C3	Smoking	LL	Red	C	Beta-3IQR	LM	Houseman3	PlateRow	BON	1.00762	-0.0607057	1.0006	-0.00345457	757	325					42.9326
C3	Smoking	LLS	Red	C	Beta-3IQR	LM	Houseman3	PlateRow	BON	1.1059	-0.349427	1.00538	-0.00875624	1061	189					17.8134
C3	Smoking	NTR	Red	C	Beta-3IQR	LM	Houseman3	PlateRow	BON	1.10783	0.279617	1.00918	0.00860521	1006	250					24.8509
C3	Smoking	Average	Red	C	Beta-3IQR	LM	Houseman3	PlateRow	BON	NA	NA	NA	NA	930	259	70	66	189	325	28.9885	11.1751	13.9441	17.8134	42.9326
D4	Smoking	RS	Red	D	Beta-3IQR	LM	Measured	Model3	BON	1.13932	0.0565396	1.00767	-0.000763645	974	291					29.8768
D4	Smoking	LL	Red	D	Beta-3IQR	LM	Measured	Model3	BON	0.958846	-0.0047948	0.997816	-0.00158478	1002	327					32.6347
D4	Smoking	LLS	Red	D	Beta-3IQR	LM	Measured	Model3	BON	1.1322	0.128188	1.00648	-0.000147219	1258	191					15.1828
D4	Smoking	NTR	Red	D	Beta-3IQR	LM	Measured	Model3	BON	1.07952	0.0391862	1.00458	-0.00111473	915	377					41.2022
D4	Smoking	Average	Red	D	Beta-3IQR	LM	Measured	Model3	BON	NA	NA	NA	NA	1037.25	296.5	105.5	80.5	191	377	29.7241	14.5413	11.4781	15.1828	41.2022
D4	Smoking	RS	Red	D	Beta-3IQR	LM	Measured	Model3	FDR	1.13932	0.0565396	1.00767	-0.000763645	6790	277					4.07953
D4	Smoking	LL	Red	D	Beta-3IQR	LM	Measured	Model3	FDR	0.958846	-0.0047948	0.997816	-0.00158478	7006	291					4.15358
D4	Smoking	LLS	Red	D	Beta-3IQR	LM	Measured	Model3	FDR	1.1322	0.128188	1.00648	-0.000147219	8545	134					1.56817
D4	Smoking	NTR	Red	D	Beta-3IQR	LM	Measured	Model3	FDR	1.07952	0.0391862	1.00458	-0.00111473	6382	379					5.93858
D4	Smoking	Average	Red	D	Beta-3IQR	LM	Measured	Model3	FDR	NA	NA	NA	NA	7180.75	270.25	136.25	108.75	134	379	3.93496	2.3668	2.00361	1.56817	5.93858
D4	BMI	RS	Red	D	Beta-3IQR	LM	Measured	Model3	BON	1.02818	-0.0334417	1.0019	0.000651877	20	9					45
D4	BMI	LL	Red	D	Beta-3IQR	LM	Measured	Model3	BON	0.917158	0.0464397	0.991592	0.000923097	13	8					61.5385
D4	BMI	LLS	Red	D	Beta-3IQR	LM	Measured	Model3	BON	1.0228	-0.0613455	1.00013	-0.000695316	18	8					44.4444
D4	BMI	NTR	Red	D	Beta-3IQR	LM	Measured	Model3	BON	1.03195	0.0219873	1.00123	-0.000100612	24	5					20.8333
D4	BMI	Average	Red	D	Beta-3IQR	LM	Measured	Model3	BON	NA	NA	NA	NA	18.75	7.5	2.5	1.5	5	9	42.9541	22.1207	18.5844	20.8333	61.5385
D4	BMI	RS	Red	D	Beta-3IQR	LM	Measured	Model3	FDR	1.02818	-0.0334417	1.0019	0.000651877	139	5					3.59712
D4	BMI	LL	Red	D	Beta-3IQR	LM	Measured	Model3	FDR	0.917158	0.0464397	0.991592	0.000923097	108	12					11.1111
D4	BMI	LLS	Red	D	Beta-3IQR	LM	Measured	Model3	FDR	1.0228	-0.0613455	1.00013	-0.000695316	161	12					7.45342
D4	BMI	NTR	Red	D	Beta-3IQR	LM	Measured	Model3	FDR	1.03195	0.0219873	1.00123	-0.000100612	186	4					2.15054
D4	BMI	Average	Red	D	Beta-3IQR	LM	Measured	Model3	FDR	NA	NA	NA	NA	148.5	8.25	4.25	3.75	4	12	6.07805	3.92751	5.03306	2.15054	11.1111
D4	Age	RS	Red	D	Beta-3IQR	LM	Measured	Model3	BON	1.21151	0.234147	1.01071	-0.00509558	46225	720					1.5576
D4	Age	LL	Red	D	Beta-3IQR	LM	Measured	Model3	BON	0.974375	-0.240642	1.00028	-0.00226893	16395	13969					85.2028
D4	Age	LLS	Red	D	Beta-3IQR	LM	Measured	Model3	BON	1.21006	0.25855	1.0102	0.00676303	45545	1969					4.3232
D4	Age	NTR	Red	D	Beta-3IQR	LM	Measured	Model3	BON	1.1973	0.0251868	1.0094	0.00452802	41033	13378					32.603
D4	Age	Average	Red	D	Beta-3IQR	LM	Measured	Model3	BON	NA	NA	NA	NA	37299.5	7509	6789	6460	720	13969	30.9217	29.3641	54.2811	1.5576	85.2028
D4	Age	RS	Red	D	Beta-3IQR	LM	Measured	Model3	FDR	1.21151	0.234147	1.01071	-0.00509558	122764	567					0.461862
D4	Age	LL	Red	D	Beta-3IQR	LM	Measured	Model3	FDR	0.974375	-0.240642	1.00028	-0.00226893	59178	29180					49.3089
D4	Age	LLS	Red	D	Beta-3IQR	LM	Measured	Model3	FDR	1.21006	0.25855	1.0102	0.00676303	121347	1681					1.38528
D4	Age	NTR	Red	D	Beta-3IQR	LM	Measured	Model3	FDR	1.1973	0.0251868	1.0094	0.00452802	118685	13427					11.3131
D4	Age	Average	Red	D	Beta-3IQR	LM	Measured	Model3	FDR	NA	NA	NA	NA	105494	11213.8	10646.8	17966.2	567	29180	15.6173	15.1554	33.6916	0.461862	49.3089
D2	Smoking	RS	Purple	D	Beta-3IQR	LM	Measured	Model1	BON	1.12177	0.0558184	1.0066	-0.000832181	1071	350					32.6797
D2	Smoking	LL	Purple	D	Beta-3IQR	LM	Measured	Model1	BON	1.04562	0.0696502	1.00284	0.000731245	974	407					41.7864
D2	Smoking	LLS	Purple	D	Beta-3IQR	LM	Measured	Model1	BON	1.14942	0.114193	1.00722	-0.000381328	1364	190					13.9296
D2	Smoking	NTR	Purple	D	Beta-3IQR	LM	Measured	Model1	BON	1.07198	0.0625917	1.00374	0.000514978	1120	354					31.6071
D2	Smoking	Average	Purple	D	Beta-3IQR	LM	Measured	Model1	BON	NA	NA	NA	NA	1132.25	325.25	135.25	81.75	190	407	30.0007	16.0711	11.7857	13.9296	41.7864
D2	Smoking	RS	Purple	D	Beta-3IQR	LM	Measured	Model1	FDR	1.12177	0.0558184	1.0066	-0.000832181	6635	314					4.73248
D2	Smoking	LL	Purple	D	Beta-3IQR	LM	Measured	Model1	FDR	1.04562	0.0696502	1.00284	0.000731245	6454	427					6.61605
D2	Smoking	LLS	Purple	D	Beta-3IQR	LM	Measured	Model1	FDR	1.14942	0.114193	1.00722	-0.000381328	8092	147					1.81661
D2	Smoking	NTR	Purple	D	Beta-3IQR	LM	Measured	Model1	FDR	1.07198	0.0625917	1.00374	0.000514978	7581	323					4.26065
D2	Smoking	Average	Purple	D	Beta-3IQR	LM	Measured	Model1	FDR	NA	NA	NA	NA	7190.5	302.75	155.75	124.25	147	427	4.35645	2.53984	2.2596	1.81661	6.61605
D2	Age	RS	Purple	D	Beta-3IQR	LM	Measured	Model1	BON	1.22341	0.181249	1.01513	-0.00830712	16929	923					5.45218
D2	Age	LL	Purple	D	Beta-3IQR	LM	Measured	Model1	BON	1.23664	0.0749498	1.00359	0.00533714	7870	7108					90.3177
D2	Age	LLS	Purple	D	Beta-3IQR	LM	Measured	Model1	BON	1.29161	-0.00252095	1.01358	-0.003349	16433	1218					7.41192
D2	Age	NTR	Purple	D	Beta-3IQR	LM	Measured	Model1	BON	1.76666	-0.0224034	1.00751	-0.00414034	13433	5233					38.9563
D2	Age	Average	Purple	D	Beta-3IQR	LM	Measured	Model1	BON	NA	NA	NA	NA	13666.2	3620.5	2697.5	3487.5	923	7108	35.5345	30.0823	54.7831	5.45218	90.3177
D2	Age	RS	Purple	D	Beta-3IQR	LM	Measured	Model1	FDR	1.22341	0.181249	1.01513	-0.00830712	58882	684					1.16165
D2	Age	LL	Purple	D	Beta-3IQR	LM	Measured	Model1	FDR	1.23664	0.0749498	1.00359	0.00533714	33361	11674					34.993
D2	Age	LLS	Purple	D	Beta-3IQR	LM	Measured	Model1	FDR	1.29161	-0.00252095	1.01358	-0.003349	56582	951					1.68075
D2	Age	NTR	Purple	D	Beta-3IQR	LM	Measured	Model1	FDR	1.76666	-0.0224034	1.00751	-0.00414034	48585	4780					9.83843
D2	Age	Average	Purple	D	Beta-3IQR	LM	Measured	Model1	FDR	NA	NA	NA	NA	49352.5	4522.25	3838.25	7151.75	684	11674	11.9184	10.7568	23.0745	1.16165	34.993
D2	BMI	RS	Purple	D	Beta-3IQR	LM	Measured	Model1	BON	1.03047	-0.0405249	1.00244	-0.00013885	32	11					34.375
D2	BMI	LL	Purple	D	Beta-3IQR	LM	Measured	Model1	BON	1.01155	-0.0492934	1.0009	-0.00133957	20	11					55
D2	BMI	LLS	Purple	D	Beta-3IQR	LM	Measured	Model1	BON	1.01753	-0.0476588	0.999826	-0.000762369	34	9					26.4706
D2	BMI	NTR	Purple	D	Beta-3IQR	LM	Measured	Model1	BON	1.03321	0.0216392	1.00147	-0.000256562	42	8					19.0476
D2	BMI	Average	Purple	D	Beta-3IQR	LM	Measured	Model1	BON	NA	NA	NA	NA	32	9.75	1.75	1.25	8	11	33.7233	14.6757	21.2767	19.0476	55
D2	BMI	RS	Purple	D	Beta-3IQR	LM	Measured	Model1	FDR	1.03047	-0.0405249	1.00244	-0.00013885	273	12					4.3956
D2	BMI	LL	Purple	D	Beta-3IQR	LM	Measured	Model1	FDR	1.01155	-0.0492934	1.0009	-0.00133957	188	20					10.6383
D2	BMI	LLS	Purple	D	Beta-3IQR	LM	Measured	Model1	FDR	1.01753	-0.0476588	0.999826	-0.000762369	300	13					4.33333
D2	BMI	NTR	Purple	D	Beta-3IQR	LM	Measured	Model1	FDR	1.03321	0.0216392	1.00147	-0.000256562	330	6					1.81818
D2	BMI	Average	Purple	D	Beta-3IQR	LM	Measured	Model1	FDR	NA	NA	NA	NA	272.75	12.75	6.75	7.25	6	20	5.29635	3.47817	5.34194	1.81818	10.6383
A1	BMI-tert	RS	Yellow	A	Beta-3IQR	LM	Measured	PlateRow	BON	NA	NA	NA	NA	NA	NA					NA
A1	BMI-tert	LL	Yellow	A	Beta-3IQR	LM	Measured	PlateRow	BON	NA	NA	NA	NA	NA	NA					NA
A1	BMI-tert	LLS	Yellow	A	Beta-3IQR	LM	Measured	PlateRow	BON	NA	NA	NA	NA	NA	NA					NA
A1	BMI-tert	NTR	Yellow	A	Beta-3IQR	LM	Measured	PlateRow	BON	NA	NA	NA	NA	NA	NA					NA
A1	BMI-tert	Average	Yellow	A	Beta-3IQR	LM	Measured	PlateRow	BON	NA	NA	NA	NA	#DIV/0!	#DIV/0!	#DIV/0!	#DIV/0!	#DIV/0!	#DIV/0!	#DIV/0!	#DIV/0!	#DIV/0!	#DIV/0!	#DIV/0!
A2	BMI-tert	RS	Green	A	Beta	LM	Measured	PlateRow	BON	NA	NA	NA	NA	NA	NA					NA
A2	BMI-tert	LL	Green	A	Beta	LM	Measured	PlateRow	BON	NA	NA	NA	NA	NA	NA					NA
A2	BMI-tert	LLS	Green	A	Beta	LM	Measured	PlateRow	BON	NA	NA	NA	NA	NA	NA					NA
A2	BMI-tert	NTR	Green	A	Beta	LM	Measured	PlateRow	BON	NA	NA	NA	NA	NA	NA					NA
A2	BMI-tert	Average	Green	A	Beta	LM	Measured	PlateRow	BON	NA	NA	NA	NA	#DIV/0!	#DIV/0!	#DIV/0!	#DIV/0!	#DIV/0!	#DIV/0!	#DIV/0!	#DIV/0!	#DIV/0!	#DIV/0!	#DIV/0!
A3	BMI-tert	RS	Blue	A	M-3IQR	LM	Measured	PlateRow	BON	NA	NA	NA	NA	NA	NA					NA
A3	BMI-tert	LL	Blue	A	M-3IQR	LM	Measured	PlateRow	BON	NA	NA	NA	NA	NA	NA					NA
A3	BMI-tert	LLS	Blue	A	M-3IQR	LM	Measured	PlateRow	BON	NA	NA	NA	NA	NA	NA					NA
A3	BMI-tert	NTR	Blue	A	M-3IQR	LM	Measured	PlateRow	BON	NA	NA	NA	NA	NA	NA					NA
A3	BMI-tert	Average	Blue	A	M-3IQR	LM	Measured	PlateRow	BON	NA	NA	NA	NA	#DIV/0!	#DIV/0!	#DIV/0!	#DIV/0!	#DIV/0!	#DIV/0!	#DIV/0!	#DIV/0!	#DIV/0!	#DIV/0!	#DIV/0!
A4	BMI-tert	RS	Red	A	M	LM	Measured	PlateRow	BON	NA	NA	NA	NA	NA	NA					NA
A4	BMI-tert	LL	Red	A	M	LM	Measured	PlateRow	BON	NA	NA	NA	NA	NA	NA					NA
A4	BMI-tert	LLS	Red	A	M	LM	Measured	PlateRow	BON	NA	NA	NA	NA	NA	NA					NA
A4	BMI-tert	NTR	Red	A	M	LM	Measured	PlateRow	BON	NA	NA	NA	NA	NA	NA					NA
A4	BMI-tert	Average	Red	A	M	LM	Measured	PlateRow	BON	NA	NA	NA	NA	#DIV/0!	#DIV/0!	#DIV/0!	#DIV/0!	#DIV/0!	#DIV/0!	#DIV/0!	#DIV/0!	#DIV/0!	#DIV/0!	#DIV/0!
A5	BMI-tert	RS	Purple	A	RIN	LM	Measured	PlateRow	BON	NA	NA	NA	NA	NA	NA					NA
A5	BMI-tert	LL	Purple	A	RIN	LM	Measured	PlateRow	BON	NA	NA	NA	NA	NA	NA					NA
A5	BMI-tert	LLS	Purple	A	RIN	LM	Measured	PlateRow	BON	NA	NA	NA	NA	NA	NA					NA
A5	BMI-tert	NTR	Purple	A	RIN	LM	Measured	PlateRow	BON	NA	NA	NA	NA	NA	NA					NA
A5	BMI-tert	Average	Purple	A	RIN	LM	Measured	PlateRow	BON	NA	NA	NA	NA	#DIV/0!	#DIV/0!	#DIV/0!	#DIV/0!	#DIV/0!	#DIV/0!	#DIV/0!	#DIV/0!	#DIV/0!	#DIV/0!	#DIV/0!
B2	BMI-tert	RS	Green	B	Beta-3IQR	LMM	Measured	PlateRow	BON	NA	NA	NA	NA	NA	NA					NA
B2	BMI-tert	LL	Green	B	Beta-3IQR	LMM	Measured	PlateRow	BON	NA	NA	NA	NA	NA	NA					NA
B2	BMI-tert	LLS	Green	B	Beta-3IQR	LMM	Measured	PlateRow	BON	NA	NA	NA	NA	NA	NA					NA
B2	BMI-tert	NTR	Green	B	Beta-3IQR	LMM	Measured	PlateRow	BON	NA	NA	NA	NA	NA	NA					NA
B2	BMI-tert	Average	Green	B	Beta-3IQR	LMM	Measured	PlateRow	BON	NA	NA	NA	NA	#DIV/0!	#DIV/0!	#DIV/0!	#DIV/0!	#DIV/0!	#DIV/0!	#DIV/0!	#DIV/0!	#DIV/0!	#DIV/0!	#DIV/0!
B3	BMI-tert	RS	Red	B	Beta-3IQR	RLMM	Measured	PlateRow	BON	NA	NA	NA	NA	NA	NA					NA
B3	BMI-tert	LL	Red	B	Beta-3IQR	RLMM	Measured	PlateRow	BON	NA	NA	NA	NA	NA	NA					NA
B3	BMI-tert	LLS	Red	B	Beta-3IQR	RLMM	Measured	PlateRow	BON	NA	NA	NA	NA	NA	NA					NA
B3	BMI-tert	NTR	Red	B	Beta-3IQR	RLMM	Measured	PlateRow	BON	NA	NA	NA	NA	NA	NA					NA
B3	BMI-tert	Average	Red	B	Beta-3IQR	RLMM	Measured	PlateRow	BON	NA	NA	NA	NA	#DIV/0!	#DIV/0!	#DIV/0!	#DIV/0!	#DIV/0!	#DIV/0!	#DIV/0!	#DIV/0!	#DIV/0!	#DIV/0!	#DIV/0!
C2	BMI-tert	RS	Green	C	Beta-3IQR	LM	Houseman6	PlateRow	BON	NA	NA	NA	NA	NA	NA					NA
C2	BMI-tert	LL	Green	C	Beta-3IQR	LM	Houseman6	PlateRow	BON	NA	NA	NA	NA	NA	NA					NA
C2	BMI-tert	LLS	Green	C	Beta-3IQR	LM	Houseman6	PlateRow	BON	NA	NA	NA	NA	NA	NA					NA
C2	BMI-tert	NTR	Green	C	Beta-3IQR	LM	Houseman6	PlateRow	BON	NA	NA	NA	NA	NA	NA					NA
C2	BMI-tert	Average	Green	C	Beta-3IQR	LM	Houseman6	PlateRow	BON	NA	NA	NA	NA	#DIV/0!	#DIV/0!	#DIV/0!	#DIV/0!	#DIV/0!	#DIV/0!	#DIV/0!	#DIV/0!	#DIV/0!	#DIV/0!	#DIV/0!
C3	BMI-tert	RS	Red	C	Beta-3IQR	LM	Houseman3	PlateRow	BON	NA	NA	NA	NA	NA	NA					NA
C3	BMI-tert	LL	Red	C	Beta-3IQR	LM	Houseman3	PlateRow	BON	NA	NA	NA	NA	NA	NA					NA
C3	BMI-tert	LLS	Red	C	Beta-3IQR	LM	Houseman3	PlateRow	BON	NA	NA	NA	NA	NA	NA					NA
C3	BMI-tert	NTR	Red	C	Beta-3IQR	LM	Houseman3	PlateRow	BON	NA	NA	NA	NA	NA	NA					NA
C3	BMI-tert	Average	Red	C	Beta-3IQR	LM	Houseman3	PlateRow	BON	NA	NA	NA	NA	#DIV/0!	#DIV/0!	#DIV/0!	#DIV/0!	#DIV/0!	#DIV/0!	#DIV/0!	#DIV/0!	#DIV/0!	#DIV/0!	#DIV/0!
C4	BMI-tert	RS	Blue	C	Beta-3IQR	LM	None	PlateRow	BON	NA	NA	NA	NA	NA	NA					NA
C4	BMI-tert	LL	Blue	C	Beta-3IQR	LM	None	PlateRow	BON	NA	NA	NA	NA	NA	NA					NA
C4	BMI-tert	LLS	Blue	C	Beta-3IQR	LM	None	PlateRow	BON	NA	NA	NA	NA	NA	NA					NA
C4	BMI-tert	NTR	Blue	C	Beta-3IQR	LM	None	PlateRow	BON	NA	NA	NA	NA	NA	NA					NA
C4	BMI-tert	Average	Blue	C	Beta-3IQR	LM	None	PlateRow	BON	NA	NA	NA	NA	#DIV/0!	#DIV/0!	#DIV/0!	#DIV/0!	#DIV/0!	#DIV/0!	#DIV/0!	#DIV/0!	#DIV/0!	#DIV/0!	#DIV/0!
D2	BMI-tert	RS	Purple	D	Beta-3IQR	LM	Measured	Model1	BON	NA	NA	NA	NA	NA	NA					NA
D2	BMI-tert	LL	Purple	D	Beta-3IQR	LM	Measured	Model1	BON	NA	NA	NA	NA	NA	NA					NA
D2	BMI-tert	LLS	Purple	D	Beta-3IQR	LM	Measured	Model1	BON	NA	NA	NA	NA	NA	NA					NA
D2	BMI-tert	NTR	Purple	D	Beta-3IQR	LM	Measured	Model1	BON	NA	NA	NA	NA	NA	NA					NA
D2	BMI-tert	Average	Purple	D	Beta-3IQR	LM	Measured	Model1	BON	NA	NA	NA	NA	#DIV/0!	#DIV/0!	#DIV/0!	#DIV/0!	#DIV/0!	#DIV/0!	#DIV/0!	#DIV/0!	#DIV/0!	#DIV/0!	#DIV/0!
D3	BMI-tert	RS	Green	D	Beta-3IQR	LM	Measured	Model2	BON	NA	NA	NA	NA	NA	NA					NA
D3	BMI-tert	LL	Green	D	Beta-3IQR	LM	Measured	Model2	BON	NA	NA	NA	NA	NA	NA					NA
D3	BMI-tert	LLS	Green	D	Beta-3IQR	LM	Measured	Model2	BON	NA	NA	NA	NA	NA	NA					NA
D3	BMI-tert	NTR	Green	D	Beta-3IQR	LM	Measured	Model2	BON	NA	NA	NA	NA	NA	NA					NA
D3	BMI-tert	Average	Green	D	Beta-3IQR	LM	Measured	Model2	BON	NA	NA	NA	NA	#DIV/0!	#DIV/0!	#DIV/0!	#DIV/0!	#DIV/0!	#DIV/0!	#DIV/0!	#DIV/0!	#DIV/0!	#DIV/0!	#DIV/0!
D4	BMI-tert	RS	Red	D	Beta-3IQR	LM	Measured	Model3	BON	NA	NA	NA	NA	NA	NA					NA
D4	BMI-tert	LL	Red	D	Beta-3IQR	LM	Measured	Model3	BON	NA	NA	NA	NA	NA	NA					NA
D4	BMI-tert	LLS	Red	D	Beta-3IQR	LM	Measured	Model3	BON	NA	NA	NA	NA	NA	NA					NA
D4	BMI-tert	NTR	Red	D	Beta-3IQR	LM	Measured	Model3	BON	NA	NA	NA	NA	NA	NA					NA
D4	BMI-tert	Average	Red	D	Beta-3IQR	LM	Measured	Model3	BON	NA	NA	NA	NA	#DIV/0!	#DIV/0!	#DIV/0!	#DIV/0!	#DIV/0!	#DIV/0!	#DIV/0!	#DIV/0!	#DIV/0!	#DIV/0!	#DIV/0!
A2	Age-tert	RS	Green	A	Beta	LM	Measured	PlateRow	BON	1.34968	-0.0619457	1.01938	-0.00944698	79684	502					0.629988
A2	Age-tert	LL	Green	A	Beta	LM	Measured	PlateRow	BON	0.993858	-0.132214	0.999564	-0.00130505	65470	36759					56.1463
A2	Age-tert	LLS	Green	A	Beta	LM	Measured	PlateRow	BON	1.08088	0.0774878	0.999651	0.0029508	83832	4973					5.9321
A2	Age-tert	NTR	Green	A	Beta	LM	Measured	PlateRow	BON	1.16395	-0.278467	1.00078	0.000418461	50652	46019					90.8533
A2	Age-tert	Average	Green	A	Beta	LM	Measured	PlateRow	BON	NA	NA	NA	NA	69909.5	22063.2	21561.2	23955.8	502	46019	38.3904	37.7604	52.4629	0.629988	90.8533
A1	Age-tert	RS	Yellow	A	Beta-3IQR	LM	Measured	PlateRow	BON	1.27999	-0.0234226	1.01849	-0.00594926	80708	817					1.01229
A1	Age-tert	LL	Yellow	A	Beta-3IQR	LM	Measured	PlateRow	BON	0.977299	-0.107423	1.00064	-0.00106228	67635	37438					55.353
A1	Age-tert	LLS	Yellow	A	Beta-3IQR	LM	Measured	PlateRow	BON	1.12301	0.0978442	1.00363	0.00134279	84761	4027					4.75101
A1	Age-tert	NTR	Yellow	A	Beta-3IQR	LM	Measured	PlateRow	BON	1.1608	-0.253658	1	0.000954819	50488	46717					92.5309
A1	Age-tert	Average	Yellow	A	Beta-3IQR	LM	Measured	PlateRow	BON	NA	NA	NA	NA	70898	22249.8	21432.8	24467.2	817	46717	38.4118	37.3995	54.1191	1.01229	92.5309
A4	Age-tert	RS	Red	A	M	LM	Measured	PlateRow	BON	1.2607	-0.0186077	1.01934	-0.0109977	81222	934					1.14993
A4	Age-tert	LL	Red	A	M	LM	Measured	PlateRow	BON	0.985758	-0.150875	1.00111	-0.00165082	66867	37890					56.6647
A4	Age-tert	LLS	Red	A	M	LM	Measured	PlateRow	BON	1.11596	0.101662	1.01068	-0.00286917	86071	4509					5.2387
A4	Age-tert	NTR	Red	A	M	LM	Measured	PlateRow	BON	1.1674	-0.276167	0.998276	0.000971799	51010	47118					92.3701
A4	Age-tert	Average	Red	A	M	LM	Measured	PlateRow	BON	NA	NA	NA	NA	71292.5	22612.8	21678.8	24505.2	934	47118	38.8559	37.7059	53.5143	1.14993	92.3701
A3	Age-tert	RS	Blue	A	M-3IQR	LM	Measured	PlateRow	BON	1.25086	-0.0175617	1.01565	-0.00726332	81480	1111					1.36352
A3	Age-tert	LL	Blue	A	M-3IQR	LM	Measured	PlateRow	BON	0.972674	-0.158458	0.999683	-0.000989554	67241	38189					56.7942
A3	Age-tert	LLS	Blue	A	M-3IQR	LM	Measured	PlateRow	BON	1.14028	0.107236	1.00063	0.00271522	86309	3840					4.44913
A3	Age-tert	NTR	Blue	A	M-3IQR	LM	Measured	PlateRow	BON	1.15914	-0.262746	0.99973	0.00131958	50942	46998					92.2579
A3	Age-tert	Average	Blue	A	M-3IQR	LM	Measured	PlateRow	BON	NA	NA	NA	NA	71493	22534.5	21423.5	24463.5	1111	46998	38.7162	37.3527	53.5417	1.36352	92.2579
A5	Age-tert	RS	Purple	A	RIN	LM	Measured	PlateRow	BON	1.2117	0.0157732	1.01928	-0.013417	81423	1276					1.56712
A5	Age-tert	LL	Purple	A	RIN	LM	Measured	PlateRow	BON	0.971372	-0.172709	0.999752	-0.000610251	65215	37940					58.1768
A5	Age-tert	LLS	Purple	A	RIN	LM	Measured	PlateRow	BON	1.13164	0.13123	1.00291	0.00268662	85030	3956					4.65248
A5	Age-tert	NTR	Purple	A	RIN	LM	Measured	PlateRow	BON	1.17577	-0.272847	0.998043	0.00260508	51336	47149					91.8439
A5	Age-tert	Average	Purple	A	RIN	LM	Measured	PlateRow	BON	NA	NA	NA	NA	70751	22580.2	21304.2	24568.8	1276	47149	39.0601	37.493	52.7838	1.56712	91.8439
B2	Age-tert	RS	Green	B	Beta-3IQR	LMM	Measured	PlateRow	BON	1.32501	-0.0534256	1.01171	-0.00408018	83624	1105					1.32139
B2	Age-tert	LL	Green	B	Beta-3IQR	LMM	Measured	PlateRow	BON	0.98285	-0.128061	0.998677	-0.00129401	72775	37700					51.8035
B2	Age-tert	LLS	Green	B	Beta-3IQR	LMM	Measured	PlateRow	BON	1.13508	0.132879	1.00446	0.00181085	88365	3959					4.48028
B2	Age-tert	NTR	Green	B	Beta-3IQR	LMM	Measured	PlateRow	BON	1.17652	-0.137961	0.999039	0.00131101	50722	47870					94.3772
B2	Age-tert	Average	Green	B	Beta-3IQR	LMM	Measured	PlateRow	BON	NA	NA	NA	NA	73871.5	22658.5	21553.5	25211.5	1105	47870	37.9956	36.6742	56.3816	1.32139	94.3772
B3	Age-tert	RS	Red	B	Beta-3IQR	RLMM	Measured	PlateRow	BON	1.26917	0.00940788	1.01525	-0.00550064	81350	1659					2.03934
B3	Age-tert	LL	Red	B	Beta-3IQR	RLMM	Measured	PlateRow	BON	0.953404	-0.158622	1.00087	-0.00160724	68288	37165					54.4239
B3	Age-tert	LLS	Red	B	Beta-3IQR	RLMM	Measured	PlateRow	BON	1.171	0.163358	1.0039	0.00556637	85886	3023					3.51978
B3	Age-tert	NTR	Red	B	Beta-3IQR	RLMM	Measured	PlateRow	BON	1.2336	-0.148848	0.999107	0.000244987	50013	45970					91.9161
B3	Age-tert	Average	Red	B	Beta-3IQR	RLMM	Measured	PlateRow	BON	NA	NA	NA	NA	71384.2	21954.2	20295.2	24015.8	1659	45970	37.9748	35.9354	53.9413	2.03934	91.9161
C4	Age-tert	RS	Blue	C	Beta-3IQR	LM	None	PlateRow	BON	1.31374	-0.067098	1.03261	-0.0348598	76927	729					0.947652
C4	Age-tert	LL	Blue	C	Beta-3IQR	LM	None	PlateRow	BON	0.954109	-0.112433	0.999121	-0.000951706	57383	35135					61.2289
C4	Age-tert	LLS	Blue	C	Beta-3IQR	LM	None	PlateRow	BON	1.17216	0.0786921	1.01116	-0.00340677	79365	1349					1.69974
C4	Age-tert	NTR	Blue	C	Beta-3IQR	LM	None	PlateRow	BON	1.08499	-0.274684	1.00084	-0.000452994	41781	38945					93.2122
C4	Age-tert	Average	Blue	C	Beta-3IQR	LM	None	PlateRow	BON	NA	NA	NA	NA	63864	19039.5	18310.5	19905.5	729	38945	39.2721	38.3245	53.9401	0.947652	93.2122
C2	Age-tert	RS	Green	C	Beta-3IQR	LM	Houseman6	PlateRow	BON	1.45397	0.109392	1.02983	-0.00214151	47744	243					0.508964
C2	Age-tert	LL	Green	C	Beta-3IQR	LM	Houseman6	PlateRow	BON	1.29944	0.0554715	0.998477	0.000672061	28371	21714					76.5359
C2	Age-tert	LLS	Green	C	Beta-3IQR	LM	Houseman6	PlateRow	BON	1.25971	0.249578	1.01528	0.00588872	53717	1151					2.14271
C2	Age-tert	NTR	Green	C	Beta-3IQR	LM	Houseman6	PlateRow	BON	1.66347	0.163591	0.998943	0.00274349	28331	25374					89.5627
C2	Age-tert	Average	Green	C	Beta-3IQR	LM	Houseman6	PlateRow	BON	NA	NA	NA	NA	39540.8	12120.5	11877.5	13253.5	243	25374	42.1876	41.6786	47.3751	0.508964	89.5627
C3	Age-tert	RS	Red	C	Beta-3IQR	LM	Houseman3	PlateRow	BON	1.58173	0.204797	1.04045	0.00396279	36013	91					0.252687
C3	Age-tert	LL	Red	C	Beta-3IQR	LM	Houseman3	PlateRow	BON	1.55686	0.184576	0.997535	0.00308344	25997	11509					44.2705
C3	Age-tert	LLS	Red	C	Beta-3IQR	LM	Houseman3	PlateRow	BON	1.40093	0.158864	1.02565	0.0083297	38161	1008					2.64144
C3	Age-tert	NTR	Red	C	Beta-3IQR	LM	Houseman3	PlateRow	BON	1.77668	0.0785856	1.00772	-0.00285247	18559	16628					89.5953
C3	Age-tert	Average	Red	C	Beta-3IQR	LM	Houseman3	PlateRow	BON	NA	NA	NA	NA	29682.5	7309	7218	9319	91	16628	34.19	33.9373	55.4054	0.252687	89.5953
D3	Age-tert	RS	Green	D	Beta-3IQR	LM	Measured	Model2	BON	2.2954	-0.142571	1.05102	-0.117036	58104	2					0.0034421
D3	Age-tert	LL	Green	D	Beta-3IQR	LM	Measured	Model2	BON	0.929941	-0.199892	0.998295	-0.00197841	24044	21957					91.3201
D3	Age-tert	LLS	Green	D	Beta-3IQR	LM	Measured	Model2	BON	1.14101	0.317705	1.00163	0.00836997	57079	3608					6.32106
D3	Age-tert	NTR	Green	D	Beta-3IQR	LM	Measured	Model2	BON	2.17182	0.422467	1.01021	0.0036187	46973	21931					46.6885
D3	Age-tert	Average	Green	D	Beta-3IQR	LM	Measured	Model2	BON	NA	NA	NA	NA	46550	11874.5	11872.5	10082.5	2	21957	36.0833	36.0798	55.2368	0.0034421	91.3201
D4	Age-tert	RS	Red	D	Beta-3IQR	LM	Measured	Model3	BON	1.29298	0.0170642	1.01651	-0.00577093	80236	707					0.881151
D4	Age-tert	LL	Red	D	Beta-3IQR	LM	Measured	Model3	BON	0.979091	-0.107034	1.00079	-0.000554893	66628	37439					56.1911
D4	Age-tert	LLS	Red	D	Beta-3IQR	LM	Measured	Model3	BON	1.13194	0.111452	1.00421	0.00258308	84143	3723					4.42461
D4	Age-tert	NTR	Red	D	Beta-3IQR	LM	Measured	Model3	BON	1.16645	-0.256297	0.998615	0.00101503	49954	46175					92.435
D4	Age-tert	Average	Red	D	Beta-3IQR	LM	Measured	Model3	BON	NA	NA	NA	NA	70240.2	22011	21304	24164	707	46175	38.483	37.6018	53.9521	0.881151	92.435
D2	Age-tert	RS	Purple	D	Beta-3IQR	LM	Measured	Model1	BON	1.31811	-0.0143544	1.03361	-0.0357752	77165	584					0.75682
D2	Age-tert	LL	Purple	D	Beta-3IQR	LM	Measured	Model1	BON	0.948492	-0.113869	1.00001	-0.000219451	57162	35305					61.7631
D2	Age-tert	LLS	Purple	D	Beta-3IQR	LM	Measured	Model1	BON	1.17451	0.100221	1.01455	-0.0060631	79153	1392					1.75862
D2	Age-tert	NTR	Purple	D	Beta-3IQR	LM	Measured	Model1	BON	1.08484	-0.275498	0.999252	-0.000501627	42059	39168					93.1263
D2	Age-tert	Average	Purple	D	Beta-3IQR	LM	Measured	Model1	BON	NA	NA	NA	NA	63884.8	19112.2	18528.2	20055.8	584	39168	39.3512	38.5944	53.7751	0.75682	93.1263
A1	Age	RS	Yellow	A	Beta-3IQR	LM	Measured	PlateRow	HI	1.26015	-0.0780905	1.01386	-0.00696973	92063	4742					5.15082
A1	Age	LL	Yellow	A	Beta-3IQR	LM	Measured	PlateRow	HI	0.974135	-0.24106	0.999306	-0.00264119	84958	48325					56.881
A1	Age	LLS	Yellow	A	Beta-3IQR	LM	Measured	PlateRow	HI	1.0611	0.141272	0.991457	0.0117252	93030	8612					9.25723
A1	Age	NTR	Yellow	A	Beta-3IQR	LM	Measured	PlateRow	HI	1.16843	-0.267867	0.999239	-0.00231283	56239	53465					95.0675
A1	Age	Average	Yellow	A	Beta-3IQR	LM	Measured	PlateRow	HI	NA	NA	NA	NA	81572.5	28786	24044	24679	4742	53465	41.5891	36.4383	53.4783	5.15082	95.0675
A1	Age	RS	Yellow	A	Beta-3IQR	LM	Measured	PlateRow	LOW	1.26015	-0.0780905	1.01386	-0.00696973	210073	3698					1.76034
A1	Age	LL	Yellow	A	Beta-3IQR	LM	Measured	PlateRow	LOW	0.974135	-0.24106	0.999306	-0.00264119	205197	48628					23.6982
A1	Age	LLS	Yellow	A	Beta-3IQR	LM	Measured	PlateRow	LOW	1.0611	0.141272	0.991457	0.0117252	212351	7532					3.54696
A1	Age	NTR	Yellow	A	Beta-3IQR	LM	Measured	PlateRow	LOW	1.16843	-0.267867	0.999239	-0.00231283	178961	82453					46.0732
A1	Age	Average	Yellow	A	Beta-3IQR	LM	Measured	PlateRow	LOW	NA	NA	NA	NA	201646	35577.8	31879.8	46875.2	3698	82453	18.7697	17.0093	27.3035	1.76034	46.0732
A1	BMI	RS	Yellow	A	Beta-3IQR	LM	Measured	PlateRow	HI	1.1561	-0.170036	1.00011	-0.000301716	12	5					41.6667
A1	BMI	LL	Yellow	A	Beta-3IQR	LM	Measured	PlateRow	HI	0.916072	0.0454686	0.990119	-0.000876299	6	6					100
A1	BMI	LLS	Yellow	A	Beta-3IQR	LM	Measured	PlateRow	HI	0.948647	0.0732979	0.99854	0.000978265	7	6					85.7143
A1	BMI	NTR	Yellow	A	Beta-3IQR	LM	Measured	PlateRow	HI	0.986207	-0.189398	1.00139	-0.00197586	11	6					54.5455
A1	BMI	Average	Yellow	A	Beta-3IQR	LM	Measured	PlateRow	HI	NA	NA	NA	NA	9	5.75	0.75	0.25	5	6	70.4816	28.8149	29.5184	41.6667	100
A1	BMI	RS	Yellow	A	Beta-3IQR	LM	Measured	PlateRow	LOW	1.1561	-0.170036	1.00011	-0.000301716	32129	0					0
A1	BMI	LL	Yellow	A	Beta-3IQR	LM	Measured	PlateRow	LOW	0.916072	0.0454686	0.990119	-0.000876299	31169	5					0.0160416
A1	BMI	LLS	Yellow	A	Beta-3IQR	LM	Measured	PlateRow	LOW	0.948647	0.0732979	0.99854	0.000978265	37541	3					0.00799126
A1	BMI	NTR	Yellow	A	Beta-3IQR	LM	Measured	PlateRow	LOW	0.986207	-0.189398	1.00139	-0.00197586	32339	2					0.00618448
A1	BMI	Average	Yellow	A	Beta-3IQR	LM	Measured	PlateRow	LOW	NA	NA	NA	NA	33294.5	2.5	2.5	2.5	0	5	0.00755433	0.00755433	0.00848725	0	0.0160416
A2	Age	RS	Green	A	Beta	LM	Measured	PlateRow	HI	1.36785	-0.0923613	1.01049	-0.0061311	94085	2707					2.87719
A2	Age	LL	Green	A	Beta	LM	Measured	PlateRow	HI	0.984935	-0.261888	0.999579	-0.00286492	85645	50230					58.6491
A2	Age	LLS	Green	A	Beta	LM	Measured	PlateRow	HI	1.09479	0.0229866	1.00036	0.004573	94680	8549					9.02936
A2	Age	NTR	Green	A	Beta	LM	Measured	PlateRow	HI	1.14905	-0.272548	0.999261	-0.00256048	56747	54025					95.2033
A2	Age	Average	Green	A	Beta	LM	Measured	PlateRow	HI	NA	NA	NA	NA	82789.2	28877.8	26170.8	25147.2	2707	54025	41.4397	38.5625	53.7635	2.87719	95.2033
A2	Age	RS	Green	A	Beta	LM	Measured	PlateRow	LOW	1.36785	-0.0923613	1.01049	-0.0061311	210387	1973					0.937796
A2	Age	LL	Green	A	Beta	LM	Measured	PlateRow	LOW	0.984935	-0.261888	0.999579	-0.00286492	206757	50644					24.4945
A2	Age	LLS	Green	A	Beta	LM	Measured	PlateRow	LOW	1.09479	0.0229866	1.00036	0.004573	212279	7514					3.53968
A2	Age	NTR	Green	A	Beta	LM	Measured	PlateRow	LOW	1.14905	-0.272548	0.999261	-0.00256048	177021	84519					47.7452
A2	Age	Average	Green	A	Beta	LM	Measured	PlateRow	LOW	NA	NA	NA	NA	201611	36162.5	34189.5	48356.5	1973	84519	19.1793	18.2415	28.5659	0.937796	47.7452
A3	Age	RS	Blue	A	M-3IQR	LM	Measured	PlateRow	HI	1.23907	-0.0573579	1.01057	-0.00625376	93612	5352					5.71722
A3	Age	LL	Blue	A	M-3IQR	LM	Measured	PlateRow	HI	0.989446	-0.287131	0.999228	-0.00377274	86241	48081					55.7519
A3	Age	LLS	Blue	A	M-3IQR	LM	Measured	PlateRow	HI	1.0662	0.15178	0.989679	0.00970954	95080	9277					9.75705
A3	Age	NTR	Blue	A	M-3IQR	LM	Measured	PlateRow	HI	1.15618	-0.283556	0.999676	-0.00264592	57394	54664					95.2434
A3	Age	Average	Blue	A	M-3IQR	LM	Measured	PlateRow	HI	NA	NA	NA	NA	83081.8	29343.5	23991.5	25320.5	5352	54664	41.6174	35.9002	53.626	5.71722	95.2434
A3	Age	RS	Blue	A	M-3IQR	LM	Measured	PlateRow	LOW	1.23907	-0.0573579	1.01057	-0.00625376	211035	4188					1.9845
A3	Age	LL	Blue	A	M-3IQR	LM	Measured	PlateRow	LOW	0.989446	-0.287131	0.999228	-0.00377274	206932	48272					23.3275
A3	Age	LLS	Blue	A	M-3IQR	LM	Measured	PlateRow	LOW	1.0662	0.15178	0.989679	0.00970954	214204	8197					3.82673
A3	Age	NTR	Blue	A	M-3IQR	LM	Measured	PlateRow	LOW	1.15618	-0.283556	0.999676	-0.00264592	179769	83640					46.5264
A3	Age	Average	Blue	A	M-3IQR	LM	Measured	PlateRow	LOW	NA	NA	NA	NA	202985	36074.2	31886.2	47565.8	4188	83640	18.9163	16.9318	27.6101	1.9845	46.5264
A4	Age	RS	Red	A	M	LM	Measured	PlateRow	HI	1.26636	-0.0597202	1.00714	-0.0048008	94558	4820					5.0974
A4	Age	LL	Red	A	M	LM	Measured	PlateRow	HI	0.99809	-0.279656	1.00071	-0.0030261	87308	48561					55.6203
A4	Age	LLS	Red	A	M	LM	Measured	PlateRow	HI	1.07147	0.0920723	1.00225	0.00240156	96209	9377					9.74649
A4	Age	NTR	Red	A	M	LM	Measured	PlateRow	HI	1.15511	-0.275549	0.999237	-0.00270816	57502	54960					95.5793
A4	Age	Average	Red	A	M	LM	Measured	PlateRow	HI	NA	NA	NA	NA	83894.2	29429.5	24609.5	25530.5	4820	54960	41.5109	36.4135	54.0684	5.0974	95.5793
A4	Age	RS	Red	A	M	LM	Measured	PlateRow	LOW	1.26636	-0.0597202	1.00714	-0.0048008	211352	3767					1.78233
A4	Age	LL	Red	A	M	LM	Measured	PlateRow	LOW	0.99809	-0.279656	1.00071	-0.0030261	208402	48657					23.3477
A4	Age	LLS	Red	A	M	LM	Measured	PlateRow	LOW	1.07147	0.0920723	1.00225	0.00240156	214562	8279					3.85856
A4	Age	NTR	Red	A	M	LM	Measured	PlateRow	LOW	1.15511	-0.275549	0.999237	-0.00270816	179441	85336					47.5566
A4	Age	Average	Red	A	M	LM	Measured	PlateRow	LOW	NA	NA	NA	NA	203439	36509.8	32742.8	48826.2	3767	85336	19.1363	17.3539	28.4203	1.78233	47.5566
A2	BMI	RS	Green	A	Beta	LM	Measured	PlateRow	HI	1.15258	-0.144084	1.00012	-0.00026041	12	5					41.6667
A2	BMI	LL	Green	A	Beta	LM	Measured	PlateRow	HI	0.903563	0.0637967	0.989792	0.00127343	8	7					87.5
A2	BMI	LLS	Green	A	Beta	LM	Measured	PlateRow	HI	0.943837	0.0622126	0.99667	0.00180494	9	7					77.7778
A2	BMI	NTR	Green	A	Beta	LM	Measured	PlateRow	HI	0.968957	-0.234701	1.00093	-0.00187967	10	7					70
A2	BMI	Average	Green	A	Beta	LM	Measured	PlateRow	HI	NA	NA	NA	NA	9.75	6.5	1.5	0.5	5	7	69.2361	27.5694	18.2639	41.6667	87.5
A2	BMI	RS	Green	A	Beta	LM	Measured	PlateRow	LOW	1.15258	-0.144084	1.00012	-0.00026041	31631	0					0
A2	BMI	LL	Green	A	Beta	LM	Measured	PlateRow	LOW	0.903563	0.0637967	0.989792	0.00127343	29743	8					0.0268971
A2	BMI	LLS	Green	A	Beta	LM	Measured	PlateRow	LOW	0.943837	0.0622126	0.99667	0.00180494	37148	3					0.0080758
A2	BMI	NTR	Green	A	Beta	LM	Measured	PlateRow	LOW	0.968957	-0.234701	1.00093	-0.00187967	31345	2					0.0063806
A2	BMI	Average	Green	A	Beta	LM	Measured	PlateRow	LOW	NA	NA	NA	NA	32466.8	3.25	3.25	4.75	0	8	0.0103384	0.0103384	0.0165587	0	0.0268971
A3	BMI	RS	Blue	A	M-3IQR	LM	Measured	PlateRow	HI	1.1608	-0.161592	1.00009	-0.00036352	12	5					41.6667
A3	BMI	LL	Blue	A	M-3IQR	LM	Measured	PlateRow	HI	0.920788	0.0538648	0.989317	-0.00271339	6	6					100
A3	BMI	LLS	Blue	A	M-3IQR	LM	Measured	PlateRow	HI	0.941639	0.0673532	0.99883	0.000810522	7	7					100
A3	BMI	NTR	Blue	A	M-3IQR	LM	Measured	PlateRow	HI	0.982997	-0.183645	1.00177	-0.00241658	12	7					58.3333
A3	BMI	Average	Blue	A	M-3IQR	LM	Measured	PlateRow	HI	NA	NA	NA	NA	9.25	6.25	1.25	0.75	5	7	75	33.3333	25	41.6667	100
A3	BMI	RS	Blue	A	M-3IQR	LM	Measured	PlateRow	LOW	1.1608	-0.161592	1.00009	-0.00036352	32417	0					0
A3	BMI	LL	Blue	A	M-3IQR	LM	Measured	PlateRow	LOW	0.920788	0.0538648	0.989317	-0.00271339	32213	4					0.0124173
A3	BMI	LLS	Blue	A	M-3IQR	LM	Measured	PlateRow	LOW	0.941639	0.0673532	0.99883	0.000810522	39416	2					0.00507408
A3	BMI	NTR	Blue	A	M-3IQR	LM	Measured	PlateRow	LOW	0.982997	-0.183645	1.00177	-0.00241658	33195	2					0.006025
A3	BMI	Average	Blue	A	M-3IQR	LM	Measured	PlateRow	LOW	NA	NA	NA	NA	34310.2	2	2	2	0	4	0.00587911	0.00587911	0.00653824	0	0.0124173
A4	BMI	RS	Red	A	M	LM	Measured	PlateRow	HI	1.16011	-0.151257	1.00011	-0.000309844	12	5					41.6667
A4	BMI	LL	Red	A	M	LM	Measured	PlateRow	HI	0.918833	0.0596529	0.989669	-0.000649457	6	6					100
A4	BMI	LLS	Red	A	M	LM	Measured	PlateRow	HI	0.937554	0.0607191	0.997702	0.00170901	9	7					77.7778
A4	BMI	NTR	Red	A	M	LM	Measured	PlateRow	HI	0.951996	-0.166156	1.00177	-0.00249337	10	7					70
A4	BMI	Average	Red	A	M	LM	Measured	PlateRow	HI	NA	NA	NA	NA	9.25	6.25	1.25	0.75	5	7	72.3611	30.6944	27.6389	41.6667	100
A4	BMI	RS	Red	A	M	LM	Measured	PlateRow	LOW	1.16011	-0.151257	1.00011	-0.000309844	32162	0					0
A4	BMI	LL	Red	A	M	LM	Measured	PlateRow	LOW	0.918833	0.0596529	0.989669	-0.000649457	31678	4					0.0126271
A4	BMI	LLS	Red	A	M	LM	Measured	PlateRow	LOW	0.937554	0.0607191	0.997702	0.00170901	39076	2					0.00511823
A4	BMI	NTR	Red	A	M	LM	Measured	PlateRow	LOW	0.951996	-0.166156	1.00177	-0.00249337	32709	2					0.00611453
A4	BMI	Average	Red	A	M	LM	Measured	PlateRow	LOW	NA	NA	NA	NA	33906.2	2	2	2	0	4	0.00596495	0.00596495	0.00666211	0	0.0126271
A5	BMI	RS	Purple	A	RIN	LM	Measured	PlateRow	HI	1.15422	-0.168328	1.0001	-0.000296949	11	5					45.4545
A5	BMI	LL	Purple	A	RIN	LM	Measured	PlateRow	HI	0.928181	0.0382224	0.992549	-0.00274431	7	6					85.7143
A5	BMI	LLS	Purple	A	RIN	LM	Measured	PlateRow	HI	0.936319	0.0647539	0.998846	0.000685571	7	6					85.7143
A5	BMI	NTR	Purple	A	RIN	LM	Measured	PlateRow	HI	0.987892	-0.191332	1.00336	-0.00482651	11	6					54.5455
A5	BMI	Average	Purple	A	RIN	LM	Measured	PlateRow	HI	NA	NA	NA	NA	9	5.75	0.75	0.25	5	6	67.8571	22.4026	17.8571	45.4545	85.7143
A5	BMI	RS	Purple	A	RIN	LM	Measured	PlateRow	LOW	1.15422	-0.168328	1.0001	-0.000296949	32959	0					0
A5	BMI	LL	Purple	A	RIN	LM	Measured	PlateRow	LOW	0.928181	0.0382224	0.992549	-0.00274431	34406	3					0.00871941
A5	BMI	LLS	Purple	A	RIN	LM	Measured	PlateRow	LOW	0.936319	0.0647539	0.998846	0.000685571	40426	3					0.00742097
A5	BMI	NTR	Purple	A	RIN	LM	Measured	PlateRow	LOW	0.987892	-0.191332	1.00336	-0.00482651	33997	2					0.00588287
A5	BMI	Average	Purple	A	RIN	LM	Measured	PlateRow	LOW	NA	NA	NA	NA	35447	2	2	1	0	3	0.00550581	0.00550581	0.0032136	0	0.00871941
B2	Age	RS	Green	B	Beta-3IQR	LMM	Measured	PlateRow	HI	1.27408	-0.0491966	1.00719	-0.00222573	91284	5550					6.07993
B2	Age	LL	Green	B	Beta-3IQR	LMM	Measured	PlateRow	HI	0.975695	-0.256094	1.00147	-0.00183317	83867	48236					57.5149
B2	Age	LLS	Green	B	Beta-3IQR	LMM	Measured	PlateRow	HI	1.07403	0.155437	0.999463	0.0112239	92225	8570					9.29249
B2	Age	NTR	Green	B	Beta-3IQR	LMM	Measured	PlateRow	HI	1.20464	-0.204892	0.997985	-0.000612817	56342	53538					95.0233
B2	Age	Average	Green	B	Beta-3IQR	LMM	Measured	PlateRow	HI	NA	NA	NA	NA	80929.5	28973.5	23423.5	24564.5	5550	53538	41.9776	35.8977	53.0456	6.07993	95.0233
B2	Age	RS	Green	B	Beta-3IQR	LMM	Measured	PlateRow	LOW	1.27408	-0.0491966	1.00719	-0.00222573	208133	4373					2.10106
B2	Age	LL	Green	B	Beta-3IQR	LMM	Measured	PlateRow	LOW	0.975695	-0.256094	1.00147	-0.00183317	202324	48554					23.9981
B2	Age	LLS	Green	B	Beta-3IQR	LMM	Measured	PlateRow	LOW	1.07403	0.155437	0.999463	0.0112239	209664	7493					3.57381
B2	Age	NTR	Green	B	Beta-3IQR	LMM	Measured	PlateRow	LOW	1.20464	-0.204892	0.997985	-0.000612817	178413	80983					45.3908
B2	Age	Average	Green	B	Beta-3IQR	LMM	Measured	PlateRow	LOW	NA	NA	NA	NA	199634	35350.8	30977.8	45632.2	4373	80983	18.7659	16.6649	26.6248	2.10106	45.3908
B3	Age	RS	Red	B	Beta-3IQR	RLMM	Measured	PlateRow	HI	1.23646	0.00154357	1.01007	-0.000347119	88912	5225					5.8766
B3	Age	LL	Red	B	Beta-3IQR	RLMM	Measured	PlateRow	HI	0.979179	-0.298529	0.997928	-0.00159945	80588	45448					56.3955
B3	Age	LLS	Red	B	Beta-3IQR	RLMM	Measured	PlateRow	HI	1.10284	0.189275	0.995445	0.0102939	90080	6747					7.49001
B3	Age	NTR	Red	B	Beta-3IQR	RLMM	Measured	PlateRow	HI	1.23558	-0.230967	0.998461	-0.00128365	53182	50059					94.1277
B3	Age	Average	Red	B	Beta-3IQR	RLMM	Measured	PlateRow	HI	NA	NA	NA	NA	78190.5	26869.8	21644.8	23189.2	5225	50059	40.9725	35.0959	53.1553	5.8766	94.1277
B3	Age	RS	Red	B	Beta-3IQR	RLMM	Measured	PlateRow	LOW	1.23646	0.00154357	1.01007	-0.000347119	208994	4075					1.94982
B3	Age	LL	Red	B	Beta-3IQR	RLMM	Measured	PlateRow	LOW	0.979179	-0.298529	0.997928	-0.00159945	201806	46284					22.9349
B3	Age	LLS	Red	B	Beta-3IQR	RLMM	Measured	PlateRow	LOW	1.10284	0.189275	0.995445	0.0102939	211284	5837					2.76263
B3	Age	NTR	Red	B	Beta-3IQR	RLMM	Measured	PlateRow	LOW	1.23558	-0.230967	0.998461	-0.00128365	179145	78094					43.5926
B3	Age	Average	Red	B	Beta-3IQR	RLMM	Measured	PlateRow	LOW	NA	NA	NA	NA	200307	33572.5	29497.5	44521.5	4075	78094	17.81	15.8602	25.7826	1.94982	43.5926
B2	BMI	RS	Green	B	Beta-3IQR	LMM	Measured	PlateRow	HI	1.15596	-0.178455	1.00029	0.00223084	14	5					35.7143
B2	BMI	LL	Green	B	Beta-3IQR	LMM	Measured	PlateRow	HI	0.918986	0.0548723	0.992221	0.00167841	6	6					100
B2	BMI	LLS	Green	B	Beta-3IQR	LMM	Measured	PlateRow	HI	0.953403	0.0618671	0.998712	-0.000376875	8	6					75
B2	BMI	NTR	Green	B	Beta-3IQR	LMM	Measured	PlateRow	HI	0.95758	-0.0726984	1.00212	-0.00647189	11	6					54.5455
B2	BMI	Average	Green	B	Beta-3IQR	LMM	Measured	PlateRow	HI	NA	NA	NA	NA	9.75	5.75	0.75	0.25	5	6	66.3149	30.6006	33.6851	35.7143	100
B2	BMI	RS	Green	B	Beta-3IQR	LMM	Measured	PlateRow	LOW	1.15596	-0.178455	1.00029	0.00223084	35040	0					0
B2	BMI	LL	Green	B	Beta-3IQR	LMM	Measured	PlateRow	LOW	0.918986	0.0548723	0.992221	0.00167841	35894	5					0.0139299
B2	BMI	LLS	Green	B	Beta-3IQR	LMM	Measured	PlateRow	LOW	0.953403	0.0618671	0.998712	-0.000376875	41786	3					0.00717944
B2	BMI	NTR	Green	B	Beta-3IQR	LMM	Measured	PlateRow	LOW	0.95758	-0.0726984	1.00212	-0.00647189	32650	3					0.00918836
B2	BMI	Average	Green	B	Beta-3IQR	LMM	Measured	PlateRow	LOW	NA	NA	NA	NA	36342.5	2.75	2.75	2.25	0	5	0.00757443	0.00757443	0.00635548	0	0.0139299
B2	Smoking	RS	Green	B	Beta-3IQR	LMM	Measured	PlateRow	HI	1.05215	-0.157028	1.00237	-0.00213928	575	191					33.2174
B2	Smoking	LL	Green	B	Beta-3IQR	LMM	Measured	PlateRow	HI	0.96209	0.0124276	0.997987	-0.00168209	436	250					57.3394
B2	Smoking	LLS	Green	B	Beta-3IQR	LMM	Measured	PlateRow	HI	1.08862	-0.377795	1.00501	-0.00829828	649	181					27.8891
B2	Smoking	NTR	Green	B	Beta-3IQR	LMM	Measured	PlateRow	HI	1.16912	0.216325	1.02091	0.0380472	589	226					38.3701
B2	Smoking	Average	Green	B	Beta-3IQR	LMM	Measured	PlateRow	HI	NA	NA	NA	NA	562.25	212	31	38	181	250	39.204	11.3149	18.1354	27.8891	57.3394
B2	Smoking	RS	Green	B	Beta-3IQR	LMM	Measured	PlateRow	LOW	1.05215	-0.157028	1.00237	-0.00213928	44855	126					0.280905
B2	Smoking	LL	Green	B	Beta-3IQR	LMM	Measured	PlateRow	LOW	0.96209	0.0124276	0.997987	-0.00168209	39324	216					0.549283
B2	Smoking	LLS	Green	B	Beta-3IQR	LMM	Measured	PlateRow	LOW	1.08862	-0.377795	1.00501	-0.00829828	49669	97					0.195293
B2	Smoking	NTR	Green	B	Beta-3IQR	LMM	Measured	PlateRow	LOW	1.16912	0.216325	1.02091	0.0380472	43376	173					0.398838
B2	Smoking	Average	Green	B	Beta-3IQR	LMM	Measured	PlateRow	LOW	NA	NA	NA	NA	44306	153	56	63	97	216	0.35608	0.160787	0.193203	0.195293	0.549283
B3	Smoking	RS	Red	B	Beta-3IQR	RLMM	Measured	PlateRow	HI	1.06231	-0.179907	1.00256	-0.00256327	569	204					35.8524
B3	Smoking	LL	Red	B	Beta-3IQR	RLMM	Measured	PlateRow	HI	0.984178	-0.0298902	0.99909	-0.00242262	456	223					48.9035
B3	Smoking	LLS	Red	B	Beta-3IQR	RLMM	Measured	PlateRow	HI	1.07725	-0.355244	1.00465	-0.00914583	622	186					29.9035
B3	Smoking	NTR	Red	B	Beta-3IQR	RLMM	Measured	PlateRow	HI	1.17929	0.217965	1.02184	0.0397804	556	219					39.3885
B3	Smoking	Average	Red	B	Beta-3IQR	RLMM	Measured	PlateRow	HI	NA	NA	NA	NA	550.75	208	22	15	186	223	38.512	8.60844	10.3915	29.9035	48.9035
B3	Smoking	RS	Red	B	Beta-3IQR	RLMM	Measured	PlateRow	LOW	1.06231	-0.179907	1.00256	-0.00256327	44394	143					0.322116
B3	Smoking	LL	Red	B	Beta-3IQR	RLMM	Measured	PlateRow	LOW	0.984178	-0.0298902	0.99909	-0.00242262	40532	187					0.461364
B3	Smoking	LLS	Red	B	Beta-3IQR	RLMM	Measured	PlateRow	LOW	1.07725	-0.355244	1.00465	-0.00914583	47300	115					0.243129
B3	Smoking	NTR	Red	B	Beta-3IQR	RLMM	Measured	PlateRow	LOW	1.17929	0.217965	1.02184	0.0397804	44061	183					0.415333
B3	Smoking	Average	Red	B	Beta-3IQR	RLMM	Measured	PlateRow	LOW	NA	NA	NA	NA	44071.8	157	42	30	115	187	0.360485	0.117356	0.100878	0.243129	0.461364
C2	BMI	RS	Green	C	Beta-3IQR	LM	Houseman6	PlateRow	HI	1.03897	-0.0554742	1.08499	-0.0117807	19	8					42.1053
C2	BMI	LL	Green	C	Beta-3IQR	LM	Houseman6	PlateRow	HI	0.971942	0.11856	0.99555	0.00429026	13	8					61.5385
C2	BMI	LLS	Green	C	Beta-3IQR	LM	Houseman6	PlateRow	HI	1.07823	0.0490161	1.00369	0.00416869	21	6					28.5714
C2	BMI	NTR	Green	C	Beta-3IQR	LM	Houseman6	PlateRow	HI	0.984209	-0.221092	1.02546	-0.0398079	28	8					28.5714
C2	BMI	Average	Green	C	Beta-3IQR	LM	Houseman6	PlateRow	HI	NA	NA	NA	NA	20.25	7.5	1.5	0.5	6	8	40.1966	11.6252	21.3418	28.5714	61.5385
C2	BMI	RS	Green	C	Beta-3IQR	LM	Houseman6	PlateRow	LOW	1.03897	-0.0554742	1.08499	-0.0117807	41372	6					0.0145026
C2	BMI	LL	Green	C	Beta-3IQR	LM	Houseman6	PlateRow	LOW	0.971942	0.11856	0.99555	0.00429026	55881	6					0.0107371
C2	BMI	LLS	Green	C	Beta-3IQR	LM	Houseman6	PlateRow	LOW	1.07823	0.0490161	1.00369	0.00416869	46148	1					0.00216694
C2	BMI	NTR	Green	C	Beta-3IQR	LM	Houseman6	PlateRow	LOW	0.984209	-0.221092	1.02546	-0.0398079	48768	3					0.00615157
C2	BMI	Average	Green	C	Beta-3IQR	LM	Houseman6	PlateRow	LOW	NA	NA	NA	NA	48042.2	4	3	2	1	6	0.00838955	0.0062226	0.00611302	0.00216694	0.0145026
C3	BMI	RS	Red	C	Beta-3IQR	LM	Houseman3	PlateRow	HI	1.04164	-0.0289008	1.00163	0.00321293	15	6					40
C3	BMI	LL	Red	C	Beta-3IQR	LM	Houseman3	PlateRow	HI	0.953821	0.0946176	0.994136	0.00385583	6	6					100
C3	BMI	LLS	Red	C	Beta-3IQR	LM	Houseman3	PlateRow	HI	0.970238	0.0876423	0.999473	-0.000334195	13	7					53.8462
C3	BMI	NTR	Red	C	Beta-3IQR	LM	Houseman3	PlateRow	HI	1.00705	-0.25249	1.00231	-0.0024344	16	8					50
C3	BMI	Average	Red	C	Beta-3IQR	LM	Houseman3	PlateRow	HI	NA	NA	NA	NA	12.5	6.75	0.75	1.25	6	8	60.9615	20.9615	39.0385	40	100
C3	BMI	RS	Red	C	Beta-3IQR	LM	Houseman3	PlateRow	LOW	1.04164	-0.0289008	1.00163	0.00321293	34073	3					0.00880463
C3	BMI	LL	Red	C	Beta-3IQR	LM	Houseman3	PlateRow	LOW	0.953821	0.0946176	0.994136	0.00385583	36207	7					0.0193333
C3	BMI	LLS	Red	C	Beta-3IQR	LM	Houseman3	PlateRow	LOW	0.970238	0.0876423	0.999473	-0.000334195	36917	2					0.00541756
C3	BMI	NTR	Red	C	Beta-3IQR	LM	Houseman3	PlateRow	LOW	1.00705	-0.25249	1.00231	-0.0024344	35090	2					0.00569963
C3	BMI	Average	Red	C	Beta-3IQR	LM	Houseman3	PlateRow	LOW	NA	NA	NA	NA	35571.8	3.5	1.5	3.5	2	7	0.00981377	0.00439621	0.00951951	0.00541756	0.0193333
C4	Age	RS	Blue	C	Beta-3IQR	LM	None	PlateRow	HI	1.20027	-0.0426621	1.01654	0.00307225	83699	3478					4.15537
C4	Age	LL	Blue	C	Beta-3IQR	LM	None	PlateRow	HI	0.93569	-0.27065	0.999176	-0.00311212	72050	43663					60.601
C4	Age	LLS	Blue	C	Beta-3IQR	LM	None	PlateRow	HI	1.15329	0.0509722	1.0081	-0.00249965	85007	2984					3.5103
C4	Age	NTR	Blue	C	Beta-3IQR	LM	None	PlateRow	HI	1.13966	-0.286407	0.998454	-0.000882174	47189	44328					93.9371
C4	Age	Average	Blue	C	Beta-3IQR	LM	None	PlateRow	HI	NA	NA	NA	NA	71986.2	23613.2	20629.2	20714.8	2984	44328	40.5509	37.0406	53.3862	3.5103	93.9371
C4	Age	RS	Blue	C	Beta-3IQR	LM	None	PlateRow	LOW	1.20027	-0.0426621	1.01654	0.00307225	209034	2916					1.39499
C4	Age	LL	Blue	C	Beta-3IQR	LM	None	PlateRow	LOW	0.93569	-0.27065	0.999176	-0.00311212	203012	44940					22.1366
C4	Age	LLS	Blue	C	Beta-3IQR	LM	None	PlateRow	LOW	1.15329	0.0509722	1.0081	-0.00249965	212756	2501					1.17553
C4	Age	NTR	Blue	C	Beta-3IQR	LM	None	PlateRow	LOW	1.13966	-0.286407	0.998454	-0.000882174	175217	72988					41.6558
C4	Age	Average	Blue	C	Beta-3IQR	LM	None	PlateRow	LOW	NA	NA	NA	NA	200005	30836.2	28335.2	42151.8	2501	72988	16.5907	15.4152	25.065	1.17553	41.6558
A5	Smoking	RS	Purple	A	RIN	LM	Measured	PlateRow	HI	1.06774	-0.164073	1.00437	-0.000528382	511	194					37.9648
A5	Smoking	LL	Purple	A	RIN	LM	Measured	PlateRow	HI	0.966969	-0.0151657	0.997803	0.000320434	393	239					60.8142
A5	Smoking	LLS	Purple	A	RIN	LM	Measured	PlateRow	HI	1.10871	-0.398953	1.00314	-0.0049385	592	164					27.7027
A5	Smoking	NTR	Purple	A	RIN	LM	Measured	PlateRow	HI	1.1706	0.278428	1.01848	0.0323639	562	199					35.4093
A5	Smoking	Average	Purple	A	RIN	LM	Measured	PlateRow	HI	NA	NA	NA	NA	514.5	199	35	40	164	239	40.4727	12.77	20.3415	27.7027	60.8142
A5	Smoking	RS	Purple	A	RIN	LM	Measured	PlateRow	LOW	1.06774	-0.164073	1.00437	-0.000528382	42256	124					0.293449
A5	Smoking	LL	Purple	A	RIN	LM	Measured	PlateRow	LOW	0.966969	-0.0151657	0.997803	0.000320434	38080	228					0.598739
A5	Smoking	LLS	Purple	A	RIN	LM	Measured	PlateRow	LOW	1.10871	-0.398953	1.00314	-0.0049385	45950	78					0.16975
A5	Smoking	NTR	Purple	A	RIN	LM	Measured	PlateRow	LOW	1.1706	0.278428	1.01848	0.0323639	41273	142					0.344051
A5	Smoking	Average	Purple	A	RIN	LM	Measured	PlateRow	LOW	NA	NA	NA	NA	41889.8	143	65	85	78	228	0.351497	0.181748	0.247242	0.16975	0.598739
A2	Smoking	RS	Green	A	Beta	LM	Measured	PlateRow	HI	1.02798	-0.142091	1.0021	-0.00334216	555	201					36.2162
A2	Smoking	LL	Green	A	Beta	LM	Measured	PlateRow	HI	0.944394	0.0504416	0.995035	0.00454152	451	271					60.0887
A2	Smoking	LLS	Green	A	Beta	LM	Measured	PlateRow	HI	1.11886	-0.398448	1.01082	-0.0163017	683	164					24.0117
A2	Smoking	NTR	Green	A	Beta	LM	Measured	PlateRow	HI	1.05939	0.0868023	1.14418	0.322941	553	220					39.783
A2	Smoking	Average	Green	A	Beta	LM	Measured	PlateRow	HI	NA	NA	NA	NA	560.5	214	50	57	164	271	40.0249	16.0132	20.0638	24.0117	60.0887
A2	Smoking	RS	Green	A	Beta	LM	Measured	PlateRow	LOW	1.02798	-0.142091	1.0021	-0.00334216	46173	134					0.290213
A2	Smoking	LL	Green	A	Beta	LM	Measured	PlateRow	LOW	0.944394	0.0504416	0.995035	0.00454152	40237	238					0.591495
A2	Smoking	LLS	Green	A	Beta	LM	Measured	PlateRow	LOW	1.11886	-0.398448	1.01082	-0.0163017	53829	75					0.13933
A2	Smoking	NTR	Green	A	Beta	LM	Measured	PlateRow	LOW	1.05939	0.0868023	1.14418	0.322941	40921	204					0.498522
A2	Smoking	Average	Green	A	Beta	LM	Measured	PlateRow	LOW	NA	NA	NA	NA	45290	162.75	87.75	75.25	75	238	0.37989	0.24056	0.211605	0.13933	0.591495
A3	Smoking	RS	Blue	A	M-3IQR	LM	Measured	PlateRow	HI	1.06953	-0.159367	1.00328	-0.00156443	523	200					38.2409
A3	Smoking	LL	Blue	A	M-3IQR	LM	Measured	PlateRow	HI	0.959572	-8.37267e-05	0.997704	-0.00131068	396	240					60.6061
A3	Smoking	LLS	Blue	A	M-3IQR	LM	Measured	PlateRow	HI	1.10977	-0.394725	1.00375	-0.00728929	594	166					27.9461
A3	Smoking	NTR	Blue	A	M-3IQR	LM	Measured	PlateRow	HI	1.14896	0.237874	1.11025	0.207573	576	201					34.8958
A3	Smoking	Average	Blue	A	M-3IQR	LM	Measured	PlateRow	HI	NA	NA	NA	NA	522.25	201.75	35.75	38.25	166	240	40.4222	12.4761	20.1838	27.9461	60.6061
A3	Smoking	RS	Blue	A	M-3IQR	LM	Measured	PlateRow	LOW	1.06953	-0.159367	1.00328	-0.00156443	42206	126					0.298536
A3	Smoking	LL	Blue	A	M-3IQR	LM	Measured	PlateRow	LOW	0.959572	-8.37267e-05	0.997704	-0.00131068	36422	223					0.612267
A3	Smoking	LLS	Blue	A	M-3IQR	LM	Measured	PlateRow	LOW	1.10977	-0.394725	1.00375	-0.00728929	47188	84					0.178011
A3	Smoking	NTR	Blue	A	M-3IQR	LM	Measured	PlateRow	LOW	1.14896	0.237874	1.11025	0.207573	41647	150					0.36017
A3	Smoking	Average	Blue	A	M-3IQR	LM	Measured	PlateRow	LOW	NA	NA	NA	NA	41865.8	145.75	61.75	77.25	84	223	0.362246	0.184235	0.250021	0.178011	0.612267
A4	Smoking	RS	Red	A	M	LM	Measured	PlateRow	HI	1.06598	-0.150794	1.00347	-0.00249722	535	199					37.1963
A4	Smoking	LL	Red	A	M	LM	Measured	PlateRow	HI	0.950709	0.0176745	0.993851	0.00454005	390	248					63.5897
A4	Smoking	LLS	Red	A	M	LM	Measured	PlateRow	HI	1.11927	-0.401756	1.00918	-0.0141817	604	166					27.4834
A4	Smoking	NTR	Red	A	M	LM	Measured	PlateRow	HI	1.12074	0.229642	1.12093	0.234679	572	201					35.1399
A4	Smoking	Average	Red	A	M	LM	Measured	PlateRow	HI	NA	NA	NA	NA	525.25	203.5	37.5	44.5	166	248	40.8523	13.3689	22.7374	27.4834	63.5897
A4	Smoking	RS	Red	A	M	LM	Measured	PlateRow	LOW	1.06598	-0.150794	1.00347	-0.00249722	42740	128					0.299485
A4	Smoking	LL	Red	A	M	LM	Measured	PlateRow	LOW	0.950709	0.0176745	0.993851	0.00454005	36571	242					0.661727
A4	Smoking	LLS	Red	A	M	LM	Measured	PlateRow	LOW	1.11927	-0.401756	1.00918	-0.0141817	48406	82					0.1694
A4	Smoking	NTR	Red	A	M	LM	Measured	PlateRow	LOW	1.12074	0.229642	1.12093	0.234679	41489	168					0.404927
A4	Smoking	Average	Red	A	M	LM	Measured	PlateRow	LOW	NA	NA	NA	NA	42301.5	155	73	87	82	242	0.383885	0.214484	0.277842	0.1694	0.661727
A1	Smoking	RS	Yellow	A	Beta-3IQR	LM	Measured	PlateRow	HI	1.0594	-0.158891	1.00236	-0.00236195	510	186					36.4706
A1	Smoking	LL	Yellow	A	Beta-3IQR	LM	Measured	PlateRow	HI	0.959318	-0.00534602	0.996103	0.00215328	399	237					59.3985
A1	Smoking	LLS	Yellow	A	Beta-3IQR	LM	Measured	PlateRow	HI	1.10029	-0.370308	1.00434	-0.00594238	581	166					28.5714
A1	Smoking	NTR	Yellow	A	Beta-3IQR	LM	Measured	PlateRow	HI	1.14565	0.23286	1.0103	0.0192644	536	212					39.5522
A1	Smoking	Average	Yellow	A	Beta-3IQR	LM	Measured	PlateRow	HI	NA	NA	NA	NA	506.5	200.25	34.25	36.75	166	237	40.9982	12.4268	18.4003	28.5714	59.3985
A1	Smoking	RS	Yellow	A	Beta-3IQR	LM	Measured	PlateRow	LOW	1.0594	-0.158891	1.00236	-0.00236195	42866	124					0.289274
A1	Smoking	LL	Yellow	A	Beta-3IQR	LM	Measured	PlateRow	LOW	0.959318	-0.00534602	0.996103	0.00215328	37083	209					0.563601
A1	Smoking	LLS	Yellow	A	Beta-3IQR	LM	Measured	PlateRow	LOW	1.10029	-0.370308	1.00434	-0.00594238	47834	79					0.165154
A1	Smoking	NTR	Yellow	A	Beta-3IQR	LM	Measured	PlateRow	LOW	1.14565	0.23286	1.0103	0.0192644	41453	153					0.369093
A1	Smoking	Average	Yellow	A	Beta-3IQR	LM	Measured	PlateRow	LOW	NA	NA	NA	NA	42309	141.25	62.25	67.75	79	209	0.34678	0.181626	0.21682	0.165154	0.563601
A5	Age	RS	Purple	A	RIN	LM	Measured	PlateRow	HI	1.2132	-0.0381282	1.00734	-0.00531605	93990	5989					6.37195
A5	Age	LL	Purple	A	RIN	LM	Measured	PlateRow	HI	0.993494	-0.294337	0.999621	-0.00409056	87476	47673					54.4984
A5	Age	LLS	Purple	A	RIN	LM	Measured	PlateRow	HI	1.05261	0.166372	0.986587	0.0169406	96174	9205					9.57119
A5	Age	NTR	Purple	A	RIN	LM	Measured	PlateRow	HI	1.15743	-0.269536	0.998876	-0.00252459	58311	55516					95.2067
A5	Age	Average	Purple	A	RIN	LM	Measured	PlateRow	HI	NA	NA	NA	NA	83987.8	29595.8	23606.8	25920.2	5989	55516	41.4121	35.0401	53.7947	6.37195	95.2067
A5	Age	RS	Purple	A	RIN	LM	Measured	PlateRow	LOW	1.2132	-0.0381282	1.00734	-0.00531605	213481	4739					2.21987
A5	Age	LL	Purple	A	RIN	LM	Measured	PlateRow	LOW	0.993494	-0.294337	0.999621	-0.00409056	210130	47690					22.6955
A5	Age	LLS	Purple	A	RIN	LM	Measured	PlateRow	LOW	1.05261	0.166372	0.986587	0.0169406	217026	8178					3.76821
A5	Age	NTR	Purple	A	RIN	LM	Measured	PlateRow	LOW	1.15743	-0.269536	0.998876	-0.00252459	182754	84371					46.1664
A5	Age	Average	Purple	A	RIN	LM	Measured	PlateRow	LOW	NA	NA	NA	NA	205848	36244.5	31505.5	48126.5	4739	84371	18.7125	16.4926	27.4539	2.21987	46.1664
B3	BMI	RS	Red	B	Beta-3IQR	RLMM	Measured	PlateRow	HI	1.16622	-0.205337	1.00024	0.00221573	10	5					50
B3	BMI	LL	Red	B	Beta-3IQR	RLMM	Measured	PlateRow	HI	0.930033	0.0372978	0.992936	0.000952771	5	5					100
B3	BMI	LLS	Red	B	Beta-3IQR	RLMM	Measured	PlateRow	HI	0.958562	0.0314237	0.998304	-0.000200942	7	7					100
B3	BMI	NTR	Red	B	Beta-3IQR	RLMM	Measured	PlateRow	HI	1.02229	-0.133887	1.00538	-0.00515247	11	5					45.4545
B3	BMI	Average	Red	B	Beta-3IQR	RLMM	Measured	PlateRow	HI	NA	NA	NA	NA	8.25	5.5	0.5	1.5	5	7	73.8636	28.4091	26.1364	45.4545	100
B3	BMI	RS	Red	B	Beta-3IQR	RLMM	Measured	PlateRow	LOW	1.16622	-0.205337	1.00024	0.00221573	33411	0					0
B3	BMI	LL	Red	B	Beta-3IQR	RLMM	Measured	PlateRow	LOW	0.930033	0.0372978	0.992936	0.000952771	34614	5					0.014445
B3	BMI	LLS	Red	B	Beta-3IQR	RLMM	Measured	PlateRow	LOW	0.958562	0.0314237	0.998304	-0.000200942	38935	4					0.0102735
B3	BMI	NTR	Red	B	Beta-3IQR	RLMM	Measured	PlateRow	LOW	1.02229	-0.133887	1.00538	-0.00515247	32681	2					0.00611976
B3	BMI	Average	Red	B	Beta-3IQR	RLMM	Measured	PlateRow	LOW	NA	NA	NA	NA	34910.2	2.75	2.75	2.25	0	5	0.00770958	0.00770958	0.00673544	0	0.014445
C4	BMI	RS	Blue	C	Beta-3IQR	LM	None	PlateRow	FDR	1.05182	-0.204492	1.00017	0.00168932	10	6					60
C4	BMI	LL	Blue	C	Beta-3IQR	LM	None	PlateRow	FDR	0.966641	-0.0424793	0.99714	-0.00259727	6	6					100
C4	BMI	LLS	Blue	C	Beta-3IQR	LM	None	PlateRow	FDR	0.941117	0.0995066	0.997911	0.00126861	8	6					75
C4	BMI	NTR	Blue	C	Beta-3IQR	LM	None	PlateRow	FDR	0.963517	-0.180148	1.00042	-0.00102026	10	5					50
C4	BMI	Average	Blue	C	Beta-3IQR	LM	None	PlateRow	FDR	NA	NA	NA	NA	8.5	5.75	0.75	0.25	5	6	71.25	21.25	28.75	50	100
C4	BMI	RS	Blue	C	Beta-3IQR	LM	None	PlateRow	BON	1.05182	-0.204492	1.00017	0.00168932	28814	3					0.0104116
C4	BMI	LL	Blue	C	Beta-3IQR	LM	None	PlateRow	BON	0.966641	-0.0424793	0.99714	-0.00259727	33556	5					0.0149005
C4	BMI	LLS	Blue	C	Beta-3IQR	LM	None	PlateRow	BON	0.941117	0.0995066	0.997911	0.00126861	28616	1					0.00349455
C4	BMI	NTR	Blue	C	Beta-3IQR	LM	None	PlateRow	BON	0.963517	-0.180148	1.00042	-0.00102026	28211	1					0.00354472
C4	BMI	Average	Blue	C	Beta-3IQR	LM	None	PlateRow	BON	NA	NA	NA	NA	29799.2	2.5	1.5	2.5	1	5	0.00808783	0.00459329	0.00681263	0.00349455	0.0149005
C2	Age	RS	Green	C	Beta-3IQR	LM	Houseman6	PlateRow	HI	1.47922	0.216262	1.02869	0.00184818	57125	797					1.39519
C2	Age	LL	Green	C	Beta-3IQR	LM	Houseman6	PlateRow	HI	1.41805	0.0394992	1.00102	0.000891321	45832	28748					62.7247
C2	Age	LLS	Green	C	Beta-3IQR	LM	Houseman6	PlateRow	HI	1.17409	0.205306	1.00456	0.00424843	55999	7526					13.4395
C2	Age	NTR	Green	C	Beta-3IQR	LM	Houseman6	PlateRow	HI	1.80838	0.180119	0.990798	-0.00219334	35173	32130					91.3485
C2	Age	Average	Green	C	Beta-3IQR	LM	Houseman6	PlateRow	HI	NA	NA	NA	NA	48532.2	17300.2	16503.2	14829.8	797	32130	42.227	40.8318	49.1215	1.39519	91.3485
C2	Age	RS	Green	C	Beta-3IQR	LM	Houseman6	PlateRow	LOW	1.47922	0.216262	1.02869	0.00184818	187086	526					0.281154
C2	Age	LL	Green	C	Beta-3IQR	LM	Houseman6	PlateRow	LOW	1.41805	0.0394992	1.00102	0.000891321	174340	27810					15.9516
C2	Age	LLS	Green	C	Beta-3IQR	LM	Houseman6	PlateRow	LOW	1.17409	0.205306	1.00456	0.00424843	188128	6227					3.30998
C2	Age	NTR	Green	C	Beta-3IQR	LM	Houseman6	PlateRow	LOW	1.80838	0.180119	0.990798	-0.00219334	153246	42336					27.6262
C2	Age	Average	Green	C	Beta-3IQR	LM	Houseman6	PlateRow	LOW	NA	NA	NA	NA	175700	19224.8	18698.8	23111.2	526	42336	11.7922	11.5111	15.8339	0.281154	27.6262
C2	Smoking	RS	Green	C	Beta-3IQR	LM	Houseman6	PlateRow	HI	1.0879	-0.11241	1.00573	-0.00525853	472	222					47.0339
C2	Smoking	LL	Green	C	Beta-3IQR	LM	Houseman6	PlateRow	HI	0.984598	-0.265925	0.997499	-0.00294404	470	240					51.0638
C2	Smoking	LLS	Green	C	Beta-3IQR	LM	Houseman6	PlateRow	HI	1.08324	-0.401139	1.00319	-0.00838086	516	206					39.9225
C2	Smoking	NTR	Green	C	Beta-3IQR	LM	Houseman6	PlateRow	HI	1.1279	0.137635	1.04259	0.065195	552	232					42.029
C2	Smoking	Average	Green	C	Beta-3IQR	LM	Houseman6	PlateRow	HI	NA	NA	NA	NA	502.5	225	19	15	206	240	45.0123	5.08982	6.05153	39.9225	51.0638
C2	Smoking	RS	Green	C	Beta-3IQR	LM	Houseman6	PlateRow	LOW	1.0879	-0.11241	1.00573	-0.00525853	43099	145					0.336435
C2	Smoking	LL	Green	C	Beta-3IQR	LM	Houseman6	PlateRow	LOW	0.984598	-0.265925	0.997499	-0.00294404	45287	162					0.357719
C2	Smoking	LLS	Green	C	Beta-3IQR	LM	Houseman6	PlateRow	LOW	1.08324	-0.401139	1.00319	-0.00838086	52445	92					0.175422
C2	Smoking	NTR	Green	C	Beta-3IQR	LM	Houseman6	PlateRow	LOW	1.1279	0.137635	1.04259	0.065195	47263	150					0.317373
C2	Smoking	Average	Green	C	Beta-3IQR	LM	Houseman6	PlateRow	LOW	NA	NA	NA	NA	47023.5	137.25	45.25	24.75	92	162	0.296737	0.121315	0.0609815	0.175422	0.357719
C3	Age	RS	Red	C	Beta-3IQR	LM	Houseman3	PlateRow	HI	1.58751	0.215727	1.05849	0.018344	39711	429					1.08031
C3	Age	LL	Red	C	Beta-3IQR	LM	Houseman3	PlateRow	HI	1.60252	0.208392	1.02481	-0.0265613	33880	15478					45.6848
C3	Age	LLS	Red	C	Beta-3IQR	LM	Houseman3	PlateRow	HI	1.27796	0.161826	1.00784	0.00247118	37781	4552					12.0484
C3	Age	NTR	Red	C	Beta-3IQR	LM	Houseman3	PlateRow	HI	2.05866	0.0604143	1.00516	-0.00514201	22127	19260					87.043
C3	Age	Average	Red	C	Beta-3IQR	LM	Houseman3	PlateRow	HI	NA	NA	NA	NA	33374.8	9929.75	9500.75	9330.25	429	19260	36.4641	35.3838	50.5789	1.08031	87.043
C3	Age	RS	Red	C	Beta-3IQR	LM	Houseman3	PlateRow	LOW	1.58751	0.215727	1.05849	0.018344	177749	234					0.131646
C3	Age	LL	Red	C	Beta-3IQR	LM	Houseman3	PlateRow	LOW	1.60252	0.208392	1.02481	-0.0265613	172563	14329					8.30363
C3	Age	LLS	Red	C	Beta-3IQR	LM	Houseman3	PlateRow	LOW	1.27796	0.161826	1.00784	0.00247118	179584	3345					1.86264
C3	Age	NTR	Red	C	Beta-3IQR	LM	Houseman3	PlateRow	LOW	2.05866	0.0604143	1.00516	-0.00514201	150704	24857					16.4939
C3	Age	Average	Red	C	Beta-3IQR	LM	Houseman3	PlateRow	LOW	NA	NA	NA	NA	170150	10691.2	10457.2	14165.8	234	24857	6.69796	6.56631	9.79596	0.131646	16.4939
C3	Smoking	RS	Red	C	Beta-3IQR	LM	Houseman3	PlateRow	HI	1.0444	-0.101515	1.00257	-0.00227211	643	250					38.8802
C3	Smoking	LL	Red	C	Beta-3IQR	LM	Houseman3	PlateRow	HI	1.00762	-0.0607057	1.0006	-0.00345457	512	285					55.6641
C3	Smoking	LLS	Red	C	Beta-3IQR	LM	Houseman3	PlateRow	HI	1.1059	-0.349427	1.00538	-0.00875624	772	187					24.2228
C3	Smoking	NTR	Red	C	Beta-3IQR	LM	Houseman3	PlateRow	HI	1.10783	0.279617	1.00918	0.00860521	699	251					35.9084
C3	Smoking	Average	Red	C	Beta-3IQR	LM	Houseman3	PlateRow	HI	NA	NA	NA	NA	656.5	243.25	56.25	41.75	187	285	38.6689	14.4461	16.9952	24.2228	55.6641
C3	Smoking	RS	Red	C	Beta-3IQR	LM	Houseman3	PlateRow	LOW	1.0444	-0.101515	1.00257	-0.00227211	41488	186					0.448322
C3	Smoking	LL	Red	C	Beta-3IQR	LM	Houseman3	PlateRow	LOW	1.00762	-0.0607057	1.0006	-0.00345457	37194	300					0.806582
C3	Smoking	LLS	Red	C	Beta-3IQR	LM	Houseman3	PlateRow	LOW	1.1059	-0.349427	1.00538	-0.00875624	42149	100					0.237254
C3	Smoking	NTR	Red	C	Beta-3IQR	LM	Houseman3	PlateRow	LOW	1.10783	0.279617	1.00918	0.00860521	44147	169					0.382812
C3	Smoking	Average	Red	C	Beta-3IQR	LM	Houseman3	PlateRow	LOW	NA	NA	NA	NA	41244.5	188.75	88.75	111.25	100	300	0.468742	0.231489	0.337839	0.237254	0.806582
C4	Smoking	RS	Blue	C	Beta-3IQR	LM	None	PlateRow	HI	0.982499	-0.189448	0.997544	-0.0029887	430	213					49.5349
C4	Smoking	LL	Blue	C	Beta-3IQR	LM	None	PlateRow	HI	0.944604	-0.00492998	0.996897	-0.00124219	383	226					59.0078
C4	Smoking	LLS	Blue	C	Beta-3IQR	LM	None	PlateRow	HI	1.05225	-0.33572	1.00211	-0.00748831	539	170					31.5399
C4	Smoking	NTR	Blue	C	Beta-3IQR	LM	None	PlateRow	HI	1.13804	0.270121	1.00109	-0.00193274	552	180					32.6087
C4	Smoking	Average	Blue	C	Beta-3IQR	LM	None	PlateRow	HI	NA	NA	NA	NA	476	197.25	27.25	28.75	170	226	43.1728	11.6329	15.835	31.5399	59.0078
C4	Smoking	RS	Blue	C	Beta-3IQR	LM	None	PlateRow	LOW	0.982499	-0.189448	0.997544	-0.0029887	41424	185					0.446601
C4	Smoking	LL	Blue	C	Beta-3IQR	LM	None	PlateRow	LOW	0.944604	-0.00492998	0.996897	-0.00124219	37528	194					0.516947
C4	Smoking	LLS	Blue	C	Beta-3IQR	LM	None	PlateRow	LOW	1.05225	-0.33572	1.00211	-0.00748831	46244	82					0.17732
C4	Smoking	NTR	Blue	C	Beta-3IQR	LM	None	PlateRow	LOW	1.13804	0.270121	1.00109	-0.00193274	44925	101					0.224819
C4	Smoking	Average	Blue	C	Beta-3IQR	LM	None	PlateRow	LOW	NA	NA	NA	NA	42530.2	140.5	58.5	53.5	82	194	0.341422	0.164102	0.175525	0.17732	0.516947
D3	Age	RS	Green	D	Beta-3IQR	LM	Measured	Model2	HI	1.50318	0.201489	1.02984	-0.00190379	36677	284					0.774327
D3	Age	LL	Green	D	Beta-3IQR	LM	Measured	Model2	HI	1.00531	-0.386031	0.998266	-0.00236152	11029	9851					89.3191
D3	Age	LLS	Green	D	Beta-3IQR	LM	Measured	Model2	HI	1.15871	0.279249	1.00799	0.0102712	36053	2443					6.77614
D3	Age	NTR	Green	D	Beta-3IQR	LM	Measured	Model2	HI	1.46345	0.345486	1.01952	0.00304168	32653	9837					30.1259
D3	Age	Average	Green	D	Beta-3IQR	LM	Measured	Model2	HI	NA	NA	NA	NA	29103	5603.75	5319.75	4247.25	284	9851	31.7488	30.9745	57.5702	0.774327	89.3191
D3	Age	RS	Green	D	Beta-3IQR	LM	Measured	Model2	LOW	1.50318	0.201489	1.02984	-0.00190379	145334	208					0.143119
D3	Age	LL	Green	D	Beta-3IQR	LM	Measured	Model2	LOW	1.00531	-0.386031	0.998266	-0.00236152	95226	31032					32.5877
D3	Age	LLS	Green	D	Beta-3IQR	LM	Measured	Model2	LOW	1.15871	0.279249	1.00799	0.0102712	148087	1964					1.32625
D3	Age	NTR	Green	D	Beta-3IQR	LM	Measured	Model2	LOW	1.46345	0.345486	1.01952	0.00304168	144759	9464					6.53776
D3	Age	Average	Green	D	Beta-3IQR	LM	Measured	Model2	LOW	NA	NA	NA	NA	133352	10667	10459	20365	208	31032	10.1487	10.0056	22.439	0.143119	32.5877
D3	BMI	RS	Green	D	Beta-3IQR	LM	Measured	Model2	HI	1.00857	-0.0672971	0.999865	-0.000369052	27	9					33.3333
D3	BMI	LL	Green	D	Beta-3IQR	LM	Measured	Model2	HI	0.853404	-0.176505	0.972158	-0.0627817	12	8					66.6667
D3	BMI	LLS	Green	D	Beta-3IQR	LM	Measured	Model2	HI	1.01224	-0.0893479	0.999513	-0.00155256	16	11					68.75
D3	BMI	NTR	Green	D	Beta-3IQR	LM	Measured	Model2	HI	1.01928	-0.0445877	1.00123	-0.00149677	22	9					40.9091
D3	BMI	Average	Green	D	Beta-3IQR	LM	Measured	Model2	HI	NA	NA	NA	NA	19.25	9.25	1.25	1.75	8	11	52.4148	19.0814	16.3352	33.3333	68.75
D3	BMI	RS	Green	D	Beta-3IQR	LM	Measured	Model2	LOW	1.00857	-0.0672971	0.999865	-0.000369052	38704	3					0.00775114
D3	BMI	LL	Green	D	Beta-3IQR	LM	Measured	Model2	LOW	0.853404	-0.176505	0.972158	-0.0627817	32600	16					0.0490798
D3	BMI	LLS	Green	D	Beta-3IQR	LM	Measured	Model2	LOW	1.01224	-0.0893479	0.999513	-0.00155256	37951	3					0.00790493
D3	BMI	NTR	Green	D	Beta-3IQR	LM	Measured	Model2	LOW	1.01928	-0.0445877	1.00123	-0.00149677	43524	2					0.00459517
D3	BMI	Average	Green	D	Beta-3IQR	LM	Measured	Model2	LOW	NA	NA	NA	NA	38194.8	6	4	10	2	16	0.0173327	0.0127376	0.031747	0.00459517	0.0490798
D3	Smoking	RS	Green	D	Beta-3IQR	LM	Measured	Model2	HI	1.12905	0.0541611	1.00661	-0.00287733	746	275					36.8633
D3	Smoking	LL	Green	D	Beta-3IQR	LM	Measured	Model2	HI	0.946515	0.0979782	0.996067	0.00254783	719	304					42.2809
D3	Smoking	LLS	Green	D	Beta-3IQR	LM	Measured	Model2	HI	1.08422	0.180033	1.00318	0.000676254	900	225					25
D3	Smoking	NTR	Green	D	Beta-3IQR	LM	Measured	Model2	HI	1.15064	-0.0863641	1.0067	-0.00248636	684	329					48.0994
D3	Smoking	Average	Green	D	Beta-3IQR	LM	Measured	Model2	HI	NA	NA	NA	NA	762.25	283.25	58.25	45.75	225	329	38.0609	13.0609	10.0385	25	48.0994
D3	Smoking	RS	Green	D	Beta-3IQR	LM	Measured	Model2	LOW	1.12905	0.0541611	1.00661	-0.00287733	45861	167					0.364144
D3	Smoking	LL	Green	D	Beta-3IQR	LM	Measured	Model2	LOW	0.946515	0.0979782	0.996067	0.00254783	43502	209					0.480438
D3	Smoking	LLS	Green	D	Beta-3IQR	LM	Measured	Model2	LOW	1.08422	0.180033	1.00318	0.000676254	50043	128					0.25578
D3	Smoking	NTR	Green	D	Beta-3IQR	LM	Measured	Model2	LOW	1.15064	-0.0863641	1.0067	-0.00248636	50640	233					0.460111
D3	Smoking	Average	Green	D	Beta-3IQR	LM	Measured	Model2	LOW	NA	NA	NA	NA	47511.5	184.25	56.25	48.75	128	233	0.390118	0.134338	0.0903197	0.25578	0.480438
D2	Age	RS	Purple	D	Beta-3IQR	LM	Measured	Model1	HI	1.22341	0.181249	1.01513	-0.00830712	14356	960					6.6871
D2	Age	LL	Purple	D	Beta-3IQR	LM	Measured	Model1	HI	1.23664	0.0749498	1.00359	0.00533714	6305	5980					94.8454
D2	Age	LLS	Purple	D	Beta-3IQR	LM	Measured	Model1	HI	1.29161	-0.00252095	1.01358	-0.003349	13950	1263					9.05376
D2	Age	NTR	Purple	D	Beta-3IQR	LM	Measured	Model1	HI	1.76666	-0.0224034	1.00751	-0.00414034	11319	5163					45.6136
D2	Age	Average	Purple	D	Beta-3IQR	LM	Measured	Model1	HI	NA	NA	NA	NA	11482.5	3341.5	2381.5	2638.5	960	5980	39.0499	32.3628	55.7954	6.6871	94.8454
D2	Age	RS	Purple	D	Beta-3IQR	LM	Measured	Model1	LOW	1.22341	0.181249	1.01513	-0.00830712	102309	591					0.577662
D2	Age	LL	Purple	D	Beta-3IQR	LM	Measured	Model1	LOW	1.23664	0.0749498	1.00359	0.00533714	83307	11264					13.5211
D2	Age	LLS	Purple	D	Beta-3IQR	LM	Measured	Model1	LOW	1.29161	-0.00252095	1.01358	-0.003349	98023	848					0.865103
D2	Age	NTR	Purple	D	Beta-3IQR	LM	Measured	Model1	LOW	1.76666	-0.0224034	1.00751	-0.00414034	91465	4422					4.83464
D2	Age	Average	Purple	D	Beta-3IQR	LM	Measured	Model1	LOW	NA	NA	NA	NA	93776	4281.25	3690.25	6982.75	591	11264	4.94962	4.37196	8.57145	0.577662	13.5211
D2	BMI	RS	Purple	D	Beta-3IQR	LM	Measured	Model1	HI	1.03047	-0.0405249	1.00244	-0.00013885	18	10					55.5556
D2	BMI	LL	Purple	D	Beta-3IQR	LM	Measured	Model1	HI	1.01155	-0.0492934	1.0009	-0.00133957	8	8					100
D2	BMI	LLS	Purple	D	Beta-3IQR	LM	Measured	Model1	HI	1.01753	-0.0476588	0.999826	-0.000762369	16	11					68.75
D2	BMI	NTR	Purple	D	Beta-3IQR	LM	Measured	Model1	HI	1.03321	0.0216392	1.00147	-0.000256562	23	6					26.087
D2	BMI	Average	Purple	D	Beta-3IQR	LM	Measured	Model1	HI	NA	NA	NA	NA	16.25	8.75	2.75	2.25	6	11	62.5981	36.5112	37.4019	26.087	100
D2	BMI	RS	Purple	D	Beta-3IQR	LM	Measured	Model1	LOW	1.03047	-0.0405249	1.00244	-0.00013885	32896	3					0.00911965
D2	BMI	LL	Purple	D	Beta-3IQR	LM	Measured	Model1	LOW	1.01155	-0.0492934	1.0009	-0.00133957	33405	7					0.0209549
D2	BMI	LLS	Purple	D	Beta-3IQR	LM	Measured	Model1	LOW	1.01753	-0.0476588	0.999826	-0.000762369	31950	3					0.00938967
D2	BMI	NTR	Purple	D	Beta-3IQR	LM	Measured	Model1	LOW	1.03321	0.0216392	1.00147	-0.000256562	33040	2					0.00605327
D2	BMI	Average	Purple	D	Beta-3IQR	LM	Measured	Model1	LOW	NA	NA	NA	NA	32822.8	3.75	1.75	3.25	2	7	0.0113794	0.00532612	0.00957556	0.00605327	0.0209549
D2	Smoking	RS	Purple	D	Beta-3IQR	LM	Measured	Model1	HI	1.12177	0.0558184	1.0066	-0.000832181	776	323					41.6237
D2	Smoking	LL	Purple	D	Beta-3IQR	LM	Measured	Model1	HI	1.04562	0.0696502	1.00284	0.000731245	674	356					52.819
D2	Smoking	LLS	Purple	D	Beta-3IQR	LM	Measured	Model1	HI	1.14942	0.114193	1.00722	-0.000381328	963	192					19.9377
D2	Smoking	NTR	Purple	D	Beta-3IQR	LM	Measured	Model1	HI	1.07198	0.0625917	1.00374	0.000514978	775	328					42.3226
D2	Smoking	Average	Purple	D	Beta-3IQR	LM	Measured	Model1	HI	NA	NA	NA	NA	797	299.75	107.75	56.25	192	356	39.1757	19.238	13.6432	19.9377	52.819
D2	Smoking	RS	Purple	D	Beta-3IQR	LM	Measured	Model1	LOW	1.12177	0.0558184	1.0066	-0.000832181	41108	194					0.471928
D2	Smoking	LL	Purple	D	Beta-3IQR	LM	Measured	Model1	LOW	1.04562	0.0696502	1.00284	0.000731245	42425	268					0.631703
D2	Smoking	LLS	Purple	D	Beta-3IQR	LM	Measured	Model1	LOW	1.14942	0.114193	1.00722	-0.000381328	43735	98					0.224077
D2	Smoking	NTR	Purple	D	Beta-3IQR	LM	Measured	Model1	LOW	1.07198	0.0625917	1.00374	0.000514978	46951	248					0.52821
D2	Smoking	Average	Purple	D	Beta-3IQR	LM	Measured	Model1	LOW	NA	NA	NA	NA	43554.8	202	104	66	98	268	0.463979	0.239903	0.167724	0.224077	0.631703
D4	Age	RS	Red	D	Beta-3IQR	LM	Measured	Model3	HI	1.21151	0.234147	1.01071	-0.00509558	40887	747					1.82699
D4	Age	LL	Red	D	Beta-3IQR	LM	Measured	Model3	HI	0.974375	-0.240642	1.00028	-0.00226893	13784	12145					88.1094
D4	Age	LLS	Red	D	Beta-3IQR	LM	Measured	Model3	HI	1.21006	0.25855	1.0102	0.00676303	40091	2011					5.01609
D4	Age	NTR	Red	D	Beta-3IQR	LM	Measured	Model3	HI	1.1973	0.0251868	1.0094	0.00452802	35616	13126					36.8542
D4	Age	Average	Red	D	Beta-3IQR	LM	Measured	Model3	HI	NA	NA	NA	NA	32594.5	7007.25	6260.25	6118.75	747	13126	32.9517	31.1247	55.1577	1.82699	88.1094
D4	Age	RS	Red	D	Beta-3IQR	LM	Measured	Model3	LOW	1.21151	0.234147	1.01071	-0.00509558	154855	544					0.351296
D4	Age	LL	Red	D	Beta-3IQR	LM	Measured	Model3	LOW	0.974375	-0.240642	1.00028	-0.00226893	103329	34258					33.1543
D4	Age	LLS	Red	D	Beta-3IQR	LM	Measured	Model3	LOW	1.21006	0.25855	1.0102	0.00676303	153158	1621					1.05838
D4	Age	NTR	Red	D	Beta-3IQR	LM	Measured	Model3	LOW	1.1973	0.0251868	1.0094	0.00452802	150886	13245					8.77815
D4	Age	Average	Red	D	Beta-3IQR	LM	Measured	Model3	LOW	NA	NA	NA	NA	140557	12417	11873	21841	544	34258	10.8355	10.4842	22.3188	0.351296	33.1543
D4	BMI	RS	Red	D	Beta-3IQR	LM	Measured	Model3	HI	1.02818	-0.0334417	1.0019	0.000651877	10	7					70
D4	BMI	LL	Red	D	Beta-3IQR	LM	Measured	Model3	HI	0.917158	0.0464397	0.991592	0.000923097	6	6					100
D4	BMI	LLS	Red	D	Beta-3IQR	LM	Measured	Model3	HI	1.0228	-0.0613455	1.00013	-0.000695316	8	7					87.5
D4	BMI	NTR	Red	D	Beta-3IQR	LM	Measured	Model3	HI	1.03195	0.0219873	1.00123	-0.000100612	14	5					35.7143
D4	BMI	Average	Red	D	Beta-3IQR	LM	Measured	Model3	HI	NA	NA	NA	NA	9.5	6.25	1.25	0.75	5	7	73.3036	37.5893	26.6964	35.7143	100
D4	BMI	RS	Red	D	Beta-3IQR	LM	Measured	Model3	LOW	1.02818	-0.0334417	1.0019	0.000651877	32401	3					0.00925897
D4	BMI	LL	Red	D	Beta-3IQR	LM	Measured	Model3	LOW	0.917158	0.0464397	0.991592	0.000923097	32117	5					0.0155681
D4	BMI	LLS	Red	D	Beta-3IQR	LM	Measured	Model3	LOW	1.0228	-0.0613455	1.00013	-0.000695316	31684	2					0.00631233
D4	BMI	NTR	Red	D	Beta-3IQR	LM	Measured	Model3	LOW	1.03195	0.0219873	1.00123	-0.000100612	33185	2					0.00602682
D4	BMI	Average	Red	D	Beta-3IQR	LM	Measured	Model3	LOW	NA	NA	NA	NA	32346.8	3	1	2	2	5	0.00929155	0.00326473	0.00627653	0.00602682	0.0155681
D4	Smoking	RS	Red	D	Beta-3IQR	LM	Measured	Model3	HI	1.13932	0.0565396	1.00767	-0.000763645	677	268					39.5864
D4	Smoking	LL	Red	D	Beta-3IQR	LM	Measured	Model3	HI	0.958846	-0.0047948	0.997816	-0.00158478	693	303					43.7229
D4	Smoking	LLS	Red	D	Beta-3IQR	LM	Measured	Model3	HI	1.1322	0.128188	1.00648	-0.000147219	862	189					21.9258
D4	Smoking	NTR	Red	D	Beta-3IQR	LM	Measured	Model3	HI	1.07952	0.0391862	1.00458	-0.00111473	641	336					52.4181
D4	Smoking	Average	Red	D	Beta-3IQR	LM	Measured	Model3	HI	NA	NA	NA	NA	718.25	274	85	62	189	336	39.4133	17.4875	13.0048	21.9258	52.4181
D4	Smoking	RS	Red	D	Beta-3IQR	LM	Measured	Model3	LOW	1.13932	0.0565396	1.00767	-0.000763645	43517	173					0.397546
D4	Smoking	LL	Red	D	Beta-3IQR	LM	Measured	Model3	LOW	0.958846	-0.0047948	0.997816	-0.00158478	43359	203					0.468184
D4	Smoking	LLS	Red	D	Beta-3IQR	LM	Measured	Model3	LOW	1.1322	0.128188	1.00648	-0.000147219	46315	86					0.185685
D4	Smoking	NTR	Red	D	Beta-3IQR	LM	Measured	Model3	LOW	1.07952	0.0391862	1.00458	-0.00111473	46882	270					0.575914
D4	Smoking	Average	Red	D	Beta-3IQR	LM	Measured	Model3	LOW	NA	NA	NA	NA	45018.2	183	97	87	86	270	0.406832	0.221147	0.169082	0.185685	0.575914

## Sheet: RNAseq
Dataset	Phenotype	Inclusion	Cohort-out	Method	Model	Cell counts	STEP	Technical	Colour	#repl	repl_lower	repl_higher	range_low	range_high	%repl	%repl_lower	%repl_higher	range_low	range_high
deseq	age	0. all exp genes	AVG	BON	LM	Measured	A	TC + CC	blue	769	197	191	572	960	53.3862	23.6828	23.8593	29.7034	77.2455
deseq	age	0. all exp genes	LL	BON	LM	Measured	A	TC + CC	blue	960					76.251
deseq	age	0. all exp genes	LLS	BON	LM	Measured	A	TC + CC	blue	641					29.7034
deseq	age	0. all exp genes	NTR	BON	LM	Measured	A	TC + CC	blue	903					77.2455
deseq	age	0. all exp genes	RS	BON	LM	Measured	A	TC + CC	blue	572					30.3448
deseq	age	0. all exp genes	AVG	FDR	LM	Measured	A	TC + CC	blue	1497.75	555.75	533.25	942	2031	29.4538	15.5603	16.5224	13.8935	45.9762
deseq	age	0. all exp genes	LL	FDR	LM	Measured	A	TC + CC	blue	2031					42.4008
deseq	age	0. all exp genes	LLS	FDR	LM	Measured	A	TC + CC	blue	1007					13.8935
deseq	age	0. all exp genes	NTR	FDR	LM	Measured	A	TC + CC	blue	2011					45.9762
deseq	age	0. all exp genes	RS	FDR	LM	Measured	A	TC + CC	blue	942					15.5446
deseq	bmi	0. all exp genes	AVG	BON	LM	Measured	A	TC + CC	blue	851.5	257.5	141.5	594	993	55.0748	27.5748	17.7257	27.5	72.8006
deseq	bmi	0. all exp genes	LL	BON	LM	Measured	A	TC + CC	blue	594					27.5
deseq	bmi	0. all exp genes	LLS	BON	LM	Measured	A	TC + CC	blue	919					59.6366
deseq	bmi	0. all exp genes	NTR	BON	LM	Measured	A	TC + CC	blue	900					60.3622
deseq	bmi	0. all exp genes	RS	BON	LM	Measured	A	TC + CC	blue	993					72.8006
deseq	bmi	0. all exp genes	AVG	FDR	LM	Measured	A	TC + CC	blue	1845	737	456	1108	2301	29.4439	14.4466	9.02794	14.9973	38.4718
deseq	bmi	0. all exp genes	LL	FDR	LM	Measured	A	TC + CC	blue	1108					14.9973
deseq	bmi	0. all exp genes	LLS	FDR	LM	Measured	A	TC + CC	blue	1980					34.8101
deseq	bmi	0. all exp genes	NTR	FDR	LM	Measured	A	TC + CC	blue	1991					29.4963
deseq	bmi	0. all exp genes	RS	FDR	LM	Measured	A	TC + CC	blue	2301					38.4718
deseq	smoking	0. all exp genes	AVG	BON	LM	Measured	A	TC + CC	blue	282	72	52	210	334	50.6564	21.2446	19.5792	29.4118	70.2355
deseq	smoking	0. all exp genes	LL	BON	LM	Measured	A	TC + CC	blue	328					70.2355
deseq	smoking	0. all exp genes	LLS	BON	LM	Measured	A	TC + CC	blue	210					29.4118
deseq	smoking	0. all exp genes	NTR	BON	LM	Measured	A	TC + CC	blue	334					61.2844
deseq	smoking	0. all exp genes	RS	BON	LM	Measured	A	TC + CC	blue	256					41.6938
deseq	smoking	0. all exp genes	AVG	FDR	LM	Measured	A	TC + CC	blue	618.75	273.75	204.25	345	823	21.9804	11.8393	10.5236	10.1411	32.5039
deseq	smoking	0. all exp genes	LL	FDR	LM	Measured	A	TC + CC	blue	823					32.5039
deseq	smoking	0. all exp genes	LLS	FDR	LM	Measured	A	TC + CC	blue	345					10.1411
deseq	smoking	0. all exp genes	NTR	FDR	LM	Measured	A	TC + CC	blue	766					27.2792
deseq	smoking	0. all exp genes	RS	FDR	LM	Measured	A	TC + CC	blue	541					17.9973
edger	age	0. all exp genes	AVG	BON	LM	Measured	A	TC + CC	red	779	196	200	583	979	53.4767	24.2051	23.7384	29.2716	77.2152
edger	age	0. all exp genes	LL	BON	LM	Measured	A	TC + CC	red	979					76.7843
edger	age	0. all exp genes	LLS	BON	LM	Measured	A	TC + CC	red	639					29.2716
edger	age	0. all exp genes	NTR	BON	LM	Measured	A	TC + CC	red	915					77.2152
edger	age	0. all exp genes	RS	BON	LM	Measured	A	TC + CC	red	583					30.6358
edger	age	0. all exp genes	AVG	FDR	LM	Measured	A	TC + CC	red	1514.5	555.5	555.5	959	2070	29.5333	15.8995	16.5264	13.6339	46.0598
edger	age	0. all exp genes	LL	FDR	LM	Measured	A	TC + CC	red	2070					42.7774
edger	age	0. all exp genes	LLS	FDR	LM	Measured	A	TC + CC	red	995					13.6339
edger	age	0. all exp genes	NTR	FDR	LM	Measured	A	TC + CC	red	2034					46.0598
edger	age	0. all exp genes	RS	FDR	LM	Measured	A	TC + CC	red	959					15.6623
edger	bmi	0. all exp genes	AVG	BON	LM	Measured	A	TC + CC	red	849.5	255.5	144.5	594	994	55.5216	27.7906	17.7282	27.7311	73.2498
edger	bmi	0. all exp genes	LL	BON	LM	Measured	A	TC + CC	red	594					27.7311
edger	bmi	0. all exp genes	LLS	BON	LM	Measured	A	TC + CC	red	921					59.9219
edger	bmi	0. all exp genes	NTR	BON	LM	Measured	A	TC + CC	red	889					61.1838
edger	bmi	0. all exp genes	RS	BON	LM	Measured	A	TC + CC	red	994					73.2498
edger	bmi	0. all exp genes	AVG	FDR	LM	Measured	A	TC + CC	red	1822.5	723.5	441.5	1099	2264	29.4221	14.3961	8.90536	15.026	38.3274
edger	bmi	0. all exp genes	LL	FDR	LM	Measured	A	TC + CC	red	1099					15.026
edger	bmi	0. all exp genes	LLS	FDR	LM	Measured	A	TC + CC	red	1958					34.6365
edger	bmi	0. all exp genes	NTR	FDR	LM	Measured	A	TC + CC	red	1969					29.6983
edger	bmi	0. all exp genes	RS	FDR	LM	Measured	A	TC + CC	red	2264					38.3274
edger	smoking	0. all exp genes	AVG	BON	LM	Measured	A	TC + CC	red	281.75	72.75	50.25	209	332	50.1974	21.1292	19.9929	29.0682	70.1903
edger	smoking	0. all exp genes	LL	BON	LM	Measured	A	TC + CC	red	332					70.1903
edger	smoking	0. all exp genes	LLS	BON	LM	Measured	A	TC + CC	red	209					29.0682
edger	smoking	0. all exp genes	NTR	BON	LM	Measured	A	TC + CC	red	330					60.4396
edger	smoking	0. all exp genes	RS	BON	LM	Measured	A	TC + CC	red	256					41.0915
edger	smoking	0. all exp genes	AVG	FDR	LM	Measured	A	TC + CC	red	619	276	209	343	828	21.7834	11.7863	10.8536	9.99709	32.637
edger	smoking	0. all exp genes	LL	FDR	LM	Measured	A	TC + CC	red	828					32.637
edger	smoking	0. all exp genes	LLS	FDR	LM	Measured	A	TC + CC	red	343					9.99709
edger	smoking	0. all exp genes	NTR	FDR	LM	Measured	A	TC + CC	red	766					26.8678
edger	smoking	0. all exp genes	RS	FDR	LM	Measured	A	TC + CC	red	539					17.6317
edger	age	1. low-high exp genes	AVG	BON	GLM	Measured	C	TC + CC	blue	771	193	215	578	986	50.9342	24.221	23.6143	26.7132	74.5484
edger	age	1. low-high exp genes	LL	BON	GLM	Measured	C	TC + CC	blue	986					72.1816
edger	age	1. low-high exp genes	LLS	BON	GLM	Measured	C	TC + CC	blue	612					26.7132
edger	age	1. low-high exp genes	NTR	BON	GLM	Measured	C	TC + CC	blue	908					74.5484
edger	age	1. low-high exp genes	RS	BON	GLM	Measured	C	TC + CC	blue	578					30.2935
edger	age	1. low-high exp genes	AVG	FDR	GLM	Measured	C	TC + CC	blue	1517	575	595	942	2112	27.5873	14.3328	15.7802	13.2545	43.3676
edger	age	1. low-high exp genes	LL	FDR	GLM	Measured	C	TC + CC	blue	2025					37.9285
edger	age	1. low-high exp genes	LLS	FDR	GLM	Measured	C	TC + CC	blue	942					13.2545
edger	age	1. low-high exp genes	NTR	FDR	GLM	Measured	C	TC + CC	blue	2112					43.3676
edger	age	1. low-high exp genes	RS	FDR	GLM	Measured	C	TC + CC	blue	989					15.7987
edger	age	1. low-high exp genes	AVG	BON	glmQLF	Measured	C	TC + CC	green	459.25	118.25	141.75	341	601	50.1207	28.1915	30.2474	21.9293	80.3681
edger	age	1. low-high exp genes	LL	BON	glmQLF	Measured	C	TC + CC	green	601					68.2179
edger	age	1. low-high exp genes	LLS	BON	glmQLF	Measured	C	TC + CC	green	341					21.9293
edger	age	1. low-high exp genes	NTR	BON	glmQLF	Measured	C	TC + CC	green	524					80.3681
edger	age	1. low-high exp genes	RS	BON	glmQLF	Measured	C	TC + CC	green	371					29.9677
edger	age	1. low-high exp genes	AVG	FDR	glmQLF	Measured	C	TC + CC	green	949.5	408.5	458.5	541	1408	28.3465	17.2171	23.1343	11.1294	51.4808
edger	age	1. low-high exp genes	LL	FDR	glmQLF	Measured	C	TC + CC	green	1221					35.1266
edger	age	1. low-high exp genes	LLS	FDR	glmQLF	Measured	C	TC + CC	green	541					11.1294
edger	age	1. low-high exp genes	NTR	FDR	glmQLF	Measured	C	TC + CC	green	1408					51.4808
edger	age	1. low-high exp genes	RS	FDR	glmQLF	Measured	C	TC + CC	green	628					15.6491
edger	bmi	1. low-high exp genes	AVG	BON	GLM	Measured	C	TC + CC	blue	928	303	204	625	1132	53.1513	27.2392	19.0886	25.9121	72.2399
edger	bmi	1. low-high exp genes	LL	BON	GLM	Measured	C	TC + CC	blue	625					25.9121
edger	bmi	1. low-high exp genes	LLS	BON	GLM	Measured	C	TC + CC	blue	994					57.6566
edger	bmi	1. low-high exp genes	NTR	BON	GLM	Measured	C	TC + CC	blue	961					56.7967
edger	bmi	1. low-high exp genes	RS	BON	GLM	Measured	C	TC + CC	blue	1132					72.2399
edger	bmi	1. low-high exp genes	AVG	FDR	GLM	Measured	C	TC + CC	blue	1890.5	785.5	458.5	1105	2349	29.8901	14.4334	8.32991	15.4567	38.22
edger	bmi	1. low-high exp genes	LL	FDR	GLM	Measured	C	TC + CC	blue	1105					15.4567
edger	bmi	1. low-high exp genes	LLS	FDR	GLM	Measured	C	TC + CC	blue	2101					34.1071
edger	bmi	1. low-high exp genes	NTR	FDR	GLM	Measured	C	TC + CC	blue	2007					31.7764
edger	bmi	1. low-high exp genes	RS	FDR	GLM	Measured	C	TC + CC	blue	2349					38.22
edger	bmi	1. low-high exp genes	AVG	BON	glmQLF	Measured	C	TC + CC	green	816.25	234.25	131.75	582	948	56.2715	25.5591	11.4912	30.7124	67.7627
edger	bmi	1. low-high exp genes	LL	BON	glmQLF	Measured	C	TC + CC	green	582					30.7124
edger	bmi	1. low-high exp genes	LLS	BON	glmQLF	Measured	C	TC + CC	green	897					63.98
edger	bmi	1. low-high exp genes	NTR	BON	glmQLF	Measured	C	TC + CC	green	838					62.6308
edger	bmi	1. low-high exp genes	RS	BON	glmQLF	Measured	C	TC + CC	green	948					67.7627
edger	bmi	1. low-high exp genes	AVG	FDR	glmQLF	Measured	C	TC + CC	green	1456	556	221	900	1677	32.3773	15.3608	6.31675	17.0164	38.694
edger	bmi	1. low-high exp genes	LL	FDR	glmQLF	Measured	C	TC + CC	green	900					17.0164
edger	bmi	1. low-high exp genes	LLS	FDR	glmQLF	Measured	C	TC + CC	green	1677					38.694
edger	bmi	1. low-high exp genes	NTR	FDR	glmQLF	Measured	C	TC + CC	green	1643					38.2805
edger	bmi	1. low-high exp genes	RS	FDR	glmQLF	Measured	C	TC + CC	green	1604					35.5182
edger	smoking	1. low-high exp genes	AVG	BON	GLM	Measured	C	TC + CC	blue	320	101	62	219	382	46.3237	22.851	18.532	23.4727	64.8557
edger	smoking	1. low-high exp genes	LL	BON	GLM	Measured	C	TC + CC	blue	382					64.8557
edger	smoking	1. low-high exp genes	LLS	BON	GLM	Measured	C	TC + CC	blue	219					23.4727
edger	smoking	1. low-high exp genes	NTR	BON	GLM	Measured	C	TC + CC	blue	373					58.2812
edger	smoking	1. low-high exp genes	RS	BON	GLM	Measured	C	TC + CC	blue	306					38.6852
edger	smoking	1. low-high exp genes	AVG	FDR	GLM	Measured	C	TC + CC	blue	706.5	363.5	278.5	343	985	21.1791	12.6722	9.44898	8.50694	30.6281
edger	smoking	1. low-high exp genes	LL	FDR	GLM	Measured	C	TC + CC	blue	985					30.6281
edger	smoking	1. low-high exp genes	LLS	FDR	GLM	Measured	C	TC + CC	blue	343					8.50694
edger	smoking	1. low-high exp genes	NTR	FDR	GLM	Measured	C	TC + CC	blue	904					29.2178
edger	smoking	1. low-high exp genes	RS	FDR	GLM	Measured	C	TC + CC	blue	594					16.3636
edger	smoking	1. low-high exp genes	AVG	BON	glmQLF	Measured	C	TC + CC	green	230.5	74.5	34.5	156	265	43.8872	21.9771	12.7367	21.9101	56.6239
edger	smoking	1. low-high exp genes	LL	BON	glmQLF	Measured	C	TC + CC	green	265					56.6239
edger	smoking	1. low-high exp genes	LLS	BON	glmQLF	Measured	C	TC + CC	green	156					21.9101
edger	smoking	1. low-high exp genes	NTR	BON	glmQLF	Measured	C	TC + CC	green	261					56.129
edger	smoking	1. low-high exp genes	RS	BON	glmQLF	Measured	C	TC + CC	green	240					40.8859
edger	smoking	1. low-high exp genes	AVG	FDR	glmQLF	Measured	C	TC + CC	green	483.25	262.25	163.75	221	647	24.2558	15.3084	11.8089	8.94737	36.0647
edger	smoking	1. low-high exp genes	LL	FDR	glmQLF	Measured	C	TC + CC	green	643					33.2472
edger	smoking	1. low-high exp genes	LLS	FDR	glmQLF	Measured	C	TC + CC	green	221					8.94737
edger	smoking	1. low-high exp genes	NTR	FDR	glmQLF	Measured	C	TC + CC	green	647					36.0647
edger	smoking	1. low-high exp genes	RS	FDR	glmQLF	Measured	C	TC + CC	green	422					18.7639
voom	age	0. all exp genes	AVG	BON	LM	Measured	D	5PC	green	432.25	219.25	225.75	213	658	46.8647	34.4304	40.3533	12.4343	87.218
voom	age	0. all exp genes	LL	BON	LM	Measured	D	5PC	green	658					71.7557
voom	age	0. all exp genes	LLS	BON	LM	Measured	D	5PC	green	278					16.0508
voom	age	0. all exp genes	NTR	BON	LM	Measured	D	5PC	green	580					87.218
voom	age	0. all exp genes	RS	BON	LM	Measured	D	5PC	green	213					12.4343
voom	age	0. all exp genes	AVG	BON	LM	Measured	D	CC	red	1006	380	251	626	1257	52.3071	33.5702	23.9139	18.7369	76.2211
voom	age	0. all exp genes	LL	BON	LM	Measured	D	CC	red	1257					73.9412
voom	age	0. all exp genes	LLS	BON	LM	Measured	D	CC	red	626					18.7369
voom	age	0. all exp genes	NTR	BON	LM	Measured	D	CC	red	1186					76.2211
voom	age	0. all exp genes	RS	BON	LM	Measured	D	CC	red	955					40.3294
voom	age	0. all exp genes	AVG	BON	LM	Measured	D	TC+CC+5HC	purple	846.25	226.25	241.75	620	1088	53.6775	25.7637	25.3776	27.9137	79.0551
voom	age	0. all exp genes	LL	BON	LM	Measured	D	TC+CC+5HC	purple	1088					78.2734
voom	age	0. all exp genes	LLS	BON	LM	Measured	D	TC+CC+5HC	purple	673					27.9137
voom	age	0. all exp genes	NTR	BON	LM	Measured	D	TC+CC+5HC	purple	1004					79.0551
voom	age	0. all exp genes	RS	BON	LM	Measured	D	TC+CC+5HC	purple	620					29.4677
voom	age	0. all exp genes	AVG	BON	LM	Measured	D	TC	blue	1002	341	244	661	1246	54.661	30.5457	25.6742	24.1153	80.3353
voom	age	0. all exp genes	LL	BON	LM	Measured	D	TC	blue	1246					80.3353
voom	age	0. all exp genes	LLS	BON	LM	Measured	D	TC	blue	661					24.1153
voom	age	0. all exp genes	NTR	BON	LM	Measured	D	TC	blue	1201					72.6998
voom	age	0. all exp genes	RS	BON	LM	Measured	D	TC	blue	900					41.4938
voom	age	0. all exp genes	AVG	BON	LM	Measured	A	TC + CC	yellow	841.75	231.75	240.25	610	1082	53.7299	25.283	25.8521	28.4468	79.582
voom	age	0. all exp genes	LL	BON	LM	Measured	A	TC + CC	yellow	1082					77.5072
voom	age	0. all exp genes	LLS	BON	LM	Measured	A	TC + CC	yellow	685					28.4468
voom	age	0. all exp genes	NTR	BON	LM	Measured	A	TC + CC	yellow	990					79.582
voom	age	0. all exp genes	RS	BON	LM	Measured	A	TC + CC	yellow	610					29.3834
voom	age	0. all exp genes	AVG	FDR	LM	Measured	D	5PC	green	1027.25	597.25	553.75	430	1581	28.9446	21.0964	26.8719	7.84815	55.8164
voom	age	0. all exp genes	LL	FDR	LM	Measured	D	5PC	green	1581					43.0087
voom	age	0. all exp genes	LLS	FDR	LM	Measured	D	5PC	green	529					9.10499
voom	age	0. all exp genes	NTR	FDR	LM	Measured	D	5PC	green	1569					55.8164
voom	age	0. all exp genes	RS	FDR	LM	Measured	D	5PC	green	430					7.84815
voom	age	0. all exp genes	AVG	FDR	LM	Measured	D	CC	red	2343	1308	897	1035	3240	30.504	20.4643	15.4208	10.0398	45.9249
voom	age	0. all exp genes	LL	FDR	LM	Measured	D	CC	red	3240					45.9249
voom	age	0. all exp genes	LLS	FDR	LM	Measured	D	CC	red	1035					10.0398
voom	age	0. all exp genes	NTR	FDR	LM	Measured	D	CC	red	3100					43.5577
voom	age	0. all exp genes	RS	FDR	LM	Measured	D	CC	red	1997					22.4938
voom	age	0. all exp genes	AVG	FDR	LM	Measured	D	TC+CC+5HC	purple	1678.25	637.25	660.75	1041	2339	29.5599	15.9276	16.1516	13.6322	45.7114
voom	age	0. all exp genes	LL	FDR	LM	Measured	D	TC+CC+5HC	purple	2339					43.4758
voom	age	0. all exp genes	LLS	FDR	LM	Measured	D	TC+CC+5HC	purple	1052					13.6322
voom	age	0. all exp genes	NTR	FDR	LM	Measured	D	TC+CC+5HC	purple	2281					45.7114
voom	age	0. all exp genes	RS	FDR	LM	Measured	D	TC+CC+5HC	purple	1041					15.4199
voom	age	0. all exp genes	AVG	FDR	LM	Measured	D	TC	blue	2027	1035	701	992	2728	30.6653	18.6846	14.5227	11.9807	45.188
voom	age	0. all exp genes	LL	FDR	LM	Measured	D	TC	blue	2728					45.188
voom	age	0. all exp genes	LLS	FDR	LM	Measured	D	TC	blue	992					11.9807
voom	age	0. all exp genes	NTR	FDR	LM	Measured	D	TC	blue	2578					39.1615
voom	age	0. all exp genes	RS	FDR	LM	Measured	D	TC	blue	1810					26.3311
voom	age	0. all exp genes	AVG	FDR	LM	Measured	A	TC + CC	yellow	1672.5	609.5	617.5	1063	2290	29.6976	15.8141	16.2769	13.8835	45.9744
voom	age	0. all exp genes	LL	FDR	LM	Measured	A	TC + CC	yellow	2290					42.8919
voom	age	0. all exp genes	LLS	FDR	LM	Measured	A	TC + CC	yellow	1070					13.8835
voom	age	0. all exp genes	NTR	FDR	LM	Measured	A	TC + CC	yellow	2267					45.9744
voom	age	0. all exp genes	RS	FDR	LM	Measured	A	TC + CC	yellow	1063					16.0404
voom	age	0. all exp genes	AVG	BON	VlmF	Measured	C	TC + CC	red	894	190	221	704	1115	54.0925	26.4738	24.8509	27.6187	78.9434
voom	age	0. all exp genes	LL	BON	VlmF	Measured	C	TC + CC	red	1115					76.3176
voom	age	0. all exp genes	LLS	BON	VlmF	Measured	C	TC + CC	red	704					27.6187
voom	age	0. all exp genes	NTR	BON	VlmF	Measured	C	TC + CC	red	1046					78.9434
voom	age	0. all exp genes	RS	BON	VlmF	Measured	C	TC + CC	red	711					33.4903
voom	age	0. all exp genes	AVG	FDR	VlmF	Measured	C	TC + CC	red	1797.75	679.75	622.25	1118	2420	27.4752	15.2899	13.6681	12.1853	41.1432
voom	age	0. all exp genes	LL	FDR	VlmF	Measured	C	TC + CC	red	2420					39.3112
voom	age	0. all exp genes	LLS	FDR	VlmF	Measured	C	TC + CC	red	1118					12.1853
voom	age	0. all exp genes	NTR	FDR	VlmF	Measured	C	TC + CC	red	2404					41.1432
voom	age	0. all exp genes	RS	FDR	VlmF	Measured	C	TC + CC	red	1249					17.2609
voom	bmi	0. all exp genes	AVG	BON	LM	Measured	D	5PC	green	469.75	71.75	39.25	398	509	50.8963	14.3826	18.3554	36.5138	69.2517
voom	bmi	0. all exp genes	LL	BON	LM	Measured	D	5PC	green	509					69.2517
voom	bmi	0. all exp genes	LLS	BON	LM	Measured	D	5PC	green	398					36.5138
voom	bmi	0. all exp genes	NTR	BON	LM	Measured	D	5PC	green	483					45.3521
voom	bmi	0. all exp genes	RS	BON	LM	Measured	D	5PC	green	489					52.4678
voom	bmi	0. all exp genes	AVG	BON	LM	Measured	D	CC	red	798.25	157.25	89.75	641	888	54.1926	18.5419	15.0382	35.6507	69.2308
voom	bmi	0. all exp genes	LL	BON	LM	Measured	D	CC	red	641					35.6507
voom	bmi	0. all exp genes	LLS	BON	LM	Measured	D	CC	red	873					69.2308
voom	bmi	0. all exp genes	NTR	BON	LM	Measured	D	CC	red	791					50.2222
voom	bmi	0. all exp genes	RS	BON	LM	Measured	D	CC	red	888					61.6667
voom	bmi	0. all exp genes	AVG	BON	LM	Measured	D	TC+CC+5HC	purple	1000	221	178	779	1178	55.905	22.6002	18.6048	33.3048	74.5098
voom	bmi	0. all exp genes	LL	BON	LM	Measured	D	TC+CC+5HC	purple	779					33.3048
voom	bmi	0. all exp genes	LLS	BON	LM	Measured	D	TC+CC+5HC	purple	1050					59.2885
voom	bmi	0. all exp genes	NTR	BON	LM	Measured	D	TC+CC+5HC	purple	993					56.5168
voom	bmi	0. all exp genes	RS	BON	LM	Measured	D	TC+CC+5HC	purple	1178					74.5098
voom	bmi	0. all exp genes	AVG	BON	LM	Measured	D	TC	blue	704.5	133.5	123.5	571	828	53.6595	19.7521	19.4208	33.9074	73.0803
voom	bmi	0. all exp genes	LL	BON	LM	Measured	D	TC	blue	571					33.9074
voom	bmi	0. all exp genes	LLS	BON	LM	Measured	D	TC	blue	715					52.3043
voom	bmi	0. all exp genes	NTR	BON	LM	Measured	D	TC	blue	704					55.3459
voom	bmi	0. all exp genes	RS	BON	LM	Measured	D	TC	blue	828					73.0803
voom	bmi	0. all exp genes	AVG	BON	LM	Measured	A	TC + CC	yellow	880.5	229.5	148.5	651	1029	55.3218	25.4457	18.707	29.8761	74.0288
voom	bmi	0. all exp genes	LL	BON	LM	Measured	A	TC + CC	yellow	651					29.8761
voom	bmi	0. all exp genes	LLS	BON	LM	Measured	A	TC + CC	yellow	960					60.9524
voom	bmi	0. all exp genes	NTR	BON	LM	Measured	A	TC + CC	yellow	882					56.4299
voom	bmi	0. all exp genes	RS	BON	LM	Measured	A	TC + CC	yellow	1029					74.0288
voom	bmi	0. all exp genes	AVG	FDR	LM	Measured	D	5PC	green	969.25	252.25	274.75	717	1244	25.5245	8.23487	11.5988	17.2896	37.1232
voom	bmi	0. all exp genes	LL	FDR	LM	Measured	D	5PC	green	1244					37.1232
voom	bmi	0. all exp genes	LLS	FDR	LM	Measured	D	5PC	green	717					17.2896
voom	bmi	0. all exp genes	NTR	FDR	LM	Measured	D	5PC	green	938					21.1738
voom	bmi	0. all exp genes	RS	FDR	LM	Measured	D	5PC	green	978					26.5112
voom	bmi	0. all exp genes	AVG	FDR	LM	Measured	D	CC	red	1755	516	691	1239	2446	26.5392	9.55494	17.2019	16.9842	43.7411
voom	bmi	0. all exp genes	LL	FDR	LM	Measured	D	CC	red	1239					16.9842
voom	bmi	0. all exp genes	LLS	FDR	LM	Measured	D	CC	red	2446					43.7411
voom	bmi	0. all exp genes	NTR	FDR	LM	Measured	D	CC	red	1549					21.0691
voom	bmi	0. all exp genes	RS	FDR	LM	Measured	D	CC	red	1786					24.3623
voom	bmi	0. all exp genes	AVG	FDR	LM	Measured	D	TC+CC+5HC	purple	2000	624	465	1376	2465	30.1883	11.8831	9.03833	18.3052	39.2266
voom	bmi	0. all exp genes	LL	FDR	LM	Measured	D	TC+CC+5HC	purple	1376					18.3052
voom	bmi	0. all exp genes	LLS	FDR	LM	Measured	D	TC+CC+5HC	purple	2142					35.0745
voom	bmi	0. all exp genes	NTR	FDR	LM	Measured	D	TC+CC+5HC	purple	2017					28.1468
voom	bmi	0. all exp genes	RS	FDR	LM	Measured	D	TC+CC+5HC	purple	2465					39.2266
voom	bmi	0. all exp genes	AVG	FDR	LM	Measured	D	TC	blue	1527.75	377.75	325.25	1150	1853	27.3502	9.63877	8.39445	17.7114	35.7446
voom	bmi	0. all exp genes	LL	FDR	LM	Measured	D	TC	blue	1150					17.7114
voom	bmi	0. all exp genes	LLS	FDR	LM	Measured	D	TC	blue	1569					29.8289
voom	bmi	0. all exp genes	NTR	FDR	LM	Measured	D	TC	blue	1539					26.1157
voom	bmi	0. all exp genes	RS	FDR	LM	Measured	D	TC	blue	1853					35.7446
voom	bmi	0. all exp genes	AVG	FDR	LM	Measured	A	TC + CC	yellow	1852.75	647.75	459.25	1205	2312	29.5163	13.272	9.31478	16.2443	38.831
voom	bmi	0. all exp genes	LL	FDR	LM	Measured	A	TC + CC	yellow	1205					16.2443
voom	bmi	0. all exp genes	LLS	FDR	LM	Measured	A	TC + CC	yellow	2003					34.9625
voom	bmi	0. all exp genes	NTR	FDR	LM	Measured	A	TC + CC	yellow	1891					28.0273
voom	bmi	0. all exp genes	RS	FDR	LM	Measured	A	TC + CC	yellow	2312					38.831
voom	bmi	0. all exp genes	AVG	BON	VlmF	Measured	C	TC + CC	red	808.25	192.25	97.75	616	906	53.0829	25.6074	18.1996	27.4755	71.2825
voom	bmi	0. all exp genes	LL	BON	VlmF	Measured	C	TC + CC	red	616					27.4755
voom	bmi	0. all exp genes	LLS	BON	VlmF	Measured	C	TC + CC	red	862					58.7995
voom	bmi	0. all exp genes	NTR	BON	VlmF	Measured	C	TC + CC	red	849					54.7742
voom	bmi	0. all exp genes	RS	BON	VlmF	Measured	C	TC + CC	red	906					71.2825
voom	bmi	0. all exp genes	AVG	FDR	VlmF	Measured	C	TC + CC	red	1943.75	565.75	424.25	1378	2368	20.9571	15.5018	11.9839	5.45527	32.941
voom	bmi	0. all exp genes	LL	FDR	VlmF	Measured	C	TC + CC	red	1378					5.45527
voom	bmi	0. all exp genes	LLS	FDR	VlmF	Measured	C	TC + CC	red	2127					32.941
voom	bmi	0. all exp genes	NTR	FDR	VlmF	Measured	C	TC + CC	red	1902					17.3985
voom	bmi	0. all exp genes	RS	FDR	VlmF	Measured	C	TC + CC	red	2368					28.0336
voom	smoking	0. all exp genes	AVG	BON	LM	Measured	D	5PC	green	163	24	14	139	177	46.1015	13.7759	9.21099	32.3256	55.3125
voom	smoking	0. all exp genes	LL	BON	LM	Measured	D	5PC	green	177					55.3125
voom	smoking	0. all exp genes	LLS	BON	LM	Measured	D	5PC	green	165					44.4744
voom	smoking	0. all exp genes	NTR	BON	LM	Measured	D	5PC	green	171					52.2936
voom	smoking	0. all exp genes	RS	BON	LM	Measured	D	5PC	green	139					32.3256
voom	smoking	0. all exp genes	AVG	BON	LM	Measured	D	CC	red	270.25	32.25	23.75	238	294	46.3774	11.2223	13.2015	35.1551	59.5789
voom	smoking	0. all exp genes	LL	BON	LM	Measured	D	CC	red	283					59.5789
voom	smoking	0. all exp genes	LLS	BON	LM	Measured	D	CC	red	238					35.1551
voom	smoking	0. all exp genes	NTR	BON	LM	Measured	D	CC	red	266					38.8321
voom	smoking	0. all exp genes	RS	BON	LM	Measured	D	CC	red	294					51.9435
voom	smoking	0. all exp genes	AVG	BON	LM	Measured	D	TC+CC+5HC	purple	358.75	93.75	59.25	265	418	51.8321	22.4855	19.7432	29.3466	71.5753
voom	smoking	0. all exp genes	LL	BON	LM	Measured	D	TC+CC+5HC	purple	418					71.5753
voom	smoking	0. all exp genes	LLS	BON	LM	Measured	D	TC+CC+5HC	purple	265					29.3466
voom	smoking	0. all exp genes	NTR	BON	LM	Measured	D	TC+CC+5HC	purple	388					58.2583
voom	smoking	0. all exp genes	RS	BON	LM	Measured	D	TC+CC+5HC	purple	364					48.1481
voom	smoking	0. all exp genes	AVG	BON	LM	Measured	D	TC	blue	285	69	39	216	324	53.9365	21.504	20.0361	32.4324	73.9726
voom	smoking	0. all exp genes	LL	BON	LM	Measured	D	TC	blue	324					73.9726
voom	smoking	0. all exp genes	LLS	BON	LM	Measured	D	TC	blue	216					32.4324
voom	smoking	0. all exp genes	NTR	BON	LM	Measured	D	TC	blue	301					55.948
voom	smoking	0. all exp genes	RS	BON	LM	Measured	D	TC	blue	299					53.3929
voom	smoking	0. all exp genes	AVG	BON	LM	Measured	A	TC + CC	yellow	354.25	86.25	54.75	268	409	51.2334	21.2222	18.2063	30.0112	69.4397
voom	smoking	0. all exp genes	LL	BON	LM	Measured	A	TC + CC	yellow	409					69.4397
voom	smoking	0. all exp genes	LLS	BON	LM	Measured	A	TC + CC	yellow	268					30.0112
voom	smoking	0. all exp genes	NTR	BON	LM	Measured	A	TC + CC	yellow	388					58.1709
voom	smoking	0. all exp genes	RS	BON	LM	Measured	A	TC + CC	yellow	352					47.3118
voom	smoking	0. all exp genes	AVG	FDR	LM	Measured	D	5PC	green	354	58	71	296	425	18.8354	6.20745	6.17928	12.628	25.0147
voom	smoking	0. all exp genes	LL	FDR	LM	Measured	D	5PC	green	425					25.0147
voom	smoking	0. all exp genes	LLS	FDR	LM	Measured	D	5PC	green	303					16.8147
voom	smoking	0. all exp genes	NTR	FDR	LM	Measured	D	5PC	green	392					20.8844
voom	smoking	0. all exp genes	RS	FDR	LM	Measured	D	5PC	green	296					12.628
voom	smoking	0. all exp genes	AVG	FDR	LM	Measured	D	CC	red	605.5	208.5	116.5	397	722	21.9369	8.15221	9.17034	13.7847	31.1073
voom	smoking	0. all exp genes	LL	FDR	LM	Measured	D	CC	red	722					31.1073
voom	smoking	0. all exp genes	LLS	FDR	LM	Measured	D	CC	red	397					13.7847
voom	smoking	0. all exp genes	NTR	FDR	LM	Measured	D	CC	red	684					17.734
voom	smoking	0. all exp genes	RS	FDR	LM	Measured	D	CC	red	619					25.1218
voom	smoking	0. all exp genes	AVG	FDR	LM	Measured	D	TC+CC+5HC	purple	754.75	339.75	231.25	415	986	24.2167	13.1501	10.8972	11.0667	35.114
voom	smoking	0. all exp genes	LL	FDR	LM	Measured	D	TC+CC+5HC	purple	986					35.114
voom	smoking	0. all exp genes	LLS	FDR	LM	Measured	D	TC+CC+5HC	purple	415					11.0667
voom	smoking	0. all exp genes	NTR	FDR	LM	Measured	D	TC+CC+5HC	purple	896					29.2619
voom	smoking	0. all exp genes	RS	FDR	LM	Measured	D	TC+CC+5HC	purple	722					21.4243
voom	smoking	0. all exp genes	AVG	FDR	LM	Measured	D	TC	blue	581.5	238.5	177.5	343	759	24.3326	12.3228	11.9138	12.0098	36.2464
voom	smoking	0. all exp genes	LL	FDR	LM	Measured	D	TC	blue	759					36.2464
voom	smoking	0. all exp genes	LLS	FDR	LM	Measured	D	TC	blue	343					12.0098
voom	smoking	0. all exp genes	NTR	FDR	LM	Measured	D	TC	blue	641					26.2382
voom	smoking	0. all exp genes	RS	FDR	LM	Measured	D	TC	blue	583					22.8359
voom	smoking	0. all exp genes	AVG	FDR	LM	Measured	A	TC + CC	yellow	735.75	321.75	228.25	414	964	23.723	12.7006	10.5709	11.0224	34.2938
voom	smoking	0. all exp genes	LL	FDR	LM	Measured	A	TC + CC	yellow	964					34.2938
voom	smoking	0. all exp genes	LLS	FDR	LM	Measured	A	TC + CC	yellow	414					11.0224
voom	smoking	0. all exp genes	NTR	FDR	LM	Measured	A	TC + CC	yellow	870					28.7984
voom	smoking	0. all exp genes	RS	FDR	LM	Measured	A	TC + CC	yellow	695					20.7773
voom	smoking	0. all exp genes	AVG	BON	VlmF	Measured	C	TC + CC	red	377	78	52	299	429	51.9615	20.017	20.5048	31.9444	72.4662
voom	smoking	0. all exp genes	LL	BON	VlmF	Measured	C	TC + CC	red	429					72.4662
voom	smoking	0. all exp genes	LLS	BON	VlmF	Measured	C	TC + CC	red	299					31.9444
voom	smoking	0. all exp genes	NTR	BON	VlmF	Measured	C	TC + CC	red	411					57.4825
voom	smoking	0. all exp genes	RS	BON	VlmF	Measured	C	TC + CC	red	369					45.9527
voom	smoking	0. all exp genes	AVG	FDR	VlmF	Measured	C	TC + CC	red	789.75	305.75	251.25	484	1041	23.3954	11.8053	10.6911	11.59	34.0864
voom	smoking	0. all exp genes	LL	FDR	VlmF	Measured	C	TC + CC	red	1041					34.0864
voom	smoking	0. all exp genes	LLS	FDR	VlmF	Measured	C	TC + CC	red	484					11.59
voom	smoking	0. all exp genes	NTR	FDR	VlmF	Measured	C	TC + CC	red	916					28.6608
voom	smoking	0. all exp genes	RS	FDR	VlmF	Measured	C	TC + CC	red	718					19.2442
voom	age	1. low-high exp genes	AVG	BON	LM	Measured	B	TC + CC	blue	892.5	245.5	258.5	647	1151	52.2891	24.9495	24.8848	27.3395	77.1739
voom	age	1. low-high exp genes	LL	BON	LM	Measured	B	TC + CC	blue	1151					75.5249
voom	age	1. low-high exp genes	LLS	BON	LM	Measured	B	TC + CC	blue	707					27.3395
voom	age	1. low-high exp genes	NTR	BON	LM	Measured	B	TC + CC	blue	1065					77.1739
voom	age	1. low-high exp genes	RS	BON	LM	Measured	B	TC + CC	blue	647					29.1179
voom	age	1. low-high exp genes	AVG	FDR	LM	Measured	B	TC + CC	blue	1788.5	678.5	689.5	1110	2478	27.7772	14.3486	14.8661	13.4285	42.6433
voom	age	1. low-high exp genes	LL	FDR	LM	Measured	B	TC + CC	blue	2435					39.6386
voom	age	1. low-high exp genes	LLS	FDR	LM	Measured	B	TC + CC	blue	1110					13.4285
voom	age	1. low-high exp genes	NTR	FDR	LM	Measured	B	TC + CC	blue	2478					42.6433
voom	age	1. low-high exp genes	RS	FDR	LM	Measured	B	TC + CC	blue	1131					15.3982
voom	bmi	1. low-high exp genes	AVG	BON	LM	Measured	B	TC + CC	blue	950	261	189	689	1139	53.7888	25.1163	19.0838	28.6725	72.8727
voom	bmi	1. low-high exp genes	LL	BON	LM	Measured	B	TC + CC	blue	689					28.6725
voom	bmi	1. low-high exp genes	LLS	BON	LM	Measured	B	TC + CC	blue	1022					59.0751
voom	bmi	1. low-high exp genes	NTR	BON	LM	Measured	B	TC + CC	blue	950					54.535
voom	bmi	1. low-high exp genes	RS	BON	LM	Measured	B	TC + CC	blue	1139					72.8727
voom	bmi	1. low-high exp genes	AVG	FDR	LM	Measured	B	TC + CC	blue	1977.5	731.5	508.5	1246	2486	28.5898	12.9169	9.07686	15.673	37.6667
voom	bmi	1. low-high exp genes	LL	FDR	LM	Measured	B	TC + CC	blue	1246					15.673
voom	bmi	1. low-high exp genes	LLS	FDR	LM	Measured	B	TC + CC	blue	2169					32.9335
voom	bmi	1. low-high exp genes	NTR	FDR	LM	Measured	B	TC + CC	blue	2009					28.0861
voom	bmi	1. low-high exp genes	RS	FDR	LM	Measured	B	TC + CC	blue	2486					37.6667
voom	smoking	1. low-high exp genes	AVG	BON	LM	Measured	B	TC + CC	blue	373.75	91.75	56.25	282	430	49.0994	20.8428	17.6708	28.2565	66.7702
voom	smoking	1. low-high exp genes	LL	BON	LM	Measured	B	TC + CC	blue	430					66.7702
voom	smoking	1. low-high exp genes	LLS	BON	LM	Measured	B	TC + CC	blue	282					28.2565
voom	smoking	1. low-high exp genes	NTR	BON	LM	Measured	B	TC + CC	blue	414					56.4802
voom	smoking	1. low-high exp genes	RS	BON	LM	Measured	B	TC + CC	blue	369					44.8905
voom	smoking	1. low-high exp genes	AVG	FDR	LM	Measured	B	TC + CC	blue	802.25	368.25	252.75	434	1055	22.3878	12.5219	8.84373	9.86588	31.2315
voom	smoking	1. low-high exp genes	LL	FDR	LM	Measured	B	TC + CC	blue	1055					31.2315
voom	smoking	1. low-high exp genes	LLS	FDR	LM	Measured	B	TC + CC	blue	434					9.86588
voom	smoking	1. low-high exp genes	NTR	FDR	LM	Measured	B	TC + CC	blue	990					29.6053
voom	smoking	1. low-high exp genes	RS	FDR	LM	Measured	B	TC + CC	blue	730					18.8484
voom	age	2. med-high exp genes	AVG	BON	LM	Measured	B	TC + CC	red	893	251	261	642	1154	52.0272	24.6637	24.6851	27.3636	76.7123
voom	age	2. med-high exp genes	LL	BON	LM	Measured	B	TC + CC	red	1154					75.1792
voom	age	2. med-high exp genes	LLS	BON	LM	Measured	B	TC + CC	red	712					27.3636
voom	age	2. med-high exp genes	NTR	BON	LM	Measured	B	TC + CC	red	1064					76.7123
voom	age	2. med-high exp genes	RS	BON	LM	Measured	B	TC + CC	red	642					28.8539
voom	age	2. med-high exp genes	AVG	FDR	LM	Measured	B	TC + CC	red	1787	679	697	1108	2484	27.6494	14.25	14.8485	13.3994	42.4979
voom	age	2. med-high exp genes	LL	FDR	LM	Measured	B	TC + CC	red	2427					39.3419
voom	age	2. med-high exp genes	LLS	FDR	LM	Measured	B	TC + CC	red	1108					13.3994
voom	age	2. med-high exp genes	NTR	FDR	LM	Measured	B	TC + CC	red	2484					42.4979
voom	age	2. med-high exp genes	RS	FDR	LM	Measured	B	TC + CC	red	1129					15.3585
voom	bmi	2. med-high exp genes	AVG	BON	LM	Measured	B	TC + CC	red	947.25	251.25	169.75	696	1117	53.4509	24.4025	17.741	29.0484	71.1918
voom	bmi	2. med-high exp genes	LL	BON	LM	Measured	B	TC + CC	red	696					29.0484
voom	bmi	2. med-high exp genes	LLS	BON	LM	Measured	B	TC + CC	red	1029					59.1379
voom	bmi	2. med-high exp genes	NTR	BON	LM	Measured	B	TC + CC	red	947					54.4253
voom	bmi	2. med-high exp genes	RS	BON	LM	Measured	B	TC + CC	red	1117					71.1918
voom	bmi	2. med-high exp genes	AVG	FDR	LM	Measured	B	TC + CC	red	1959.25	706.25	451.75	1253	2411	28.3345	12.3951	7.96479	15.9394	36.2993
voom	bmi	2. med-high exp genes	LL	FDR	LM	Measured	B	TC + CC	red	1253					15.9394
voom	bmi	2. med-high exp genes	LLS	FDR	LM	Measured	B	TC + CC	red	2175					33.0296
voom	bmi	2. med-high exp genes	NTR	FDR	LM	Measured	B	TC + CC	red	1998					28.0697
voom	bmi	2. med-high exp genes	RS	FDR	LM	Measured	B	TC + CC	red	2411					36.2993
voom	smoking	2. med-high exp genes	AVG	BON	LM	Measured	B	TC + CC	red	374	92	58	282	432	48.9406	20.7969	18.0362	28.1437	66.9767
voom	smoking	2. med-high exp genes	LL	BON	LM	Measured	B	TC + CC	red	432					66.9767
voom	smoking	2. med-high exp genes	LLS	BON	LM	Measured	B	TC + CC	red	282					28.1437
voom	smoking	2. med-high exp genes	NTR	BON	LM	Measured	B	TC + CC	red	415					56.157
voom	smoking	2. med-high exp genes	RS	BON	LM	Measured	B	TC + CC	red	367					44.4848
voom	smoking	2. med-high exp genes	AVG	FDR	LM	Measured	B	TC + CC	red	803	367	257	436	1060	22.393	12.5354	8.96794	9.85756	31.3609
voom	smoking	2. med-high exp genes	LL	FDR	LM	Measured	B	TC + CC	red	1060					31.3609
voom	smoking	2. med-high exp genes	LLS	FDR	LM	Measured	B	TC + CC	red	436					9.85756
voom	smoking	2. med-high exp genes	NTR	FDR	LM	Measured	B	TC + CC	red	989					29.6019
voom	smoking	2. med-high exp genes	RS	FDR	LM	Measured	B	TC + CC	red	727					18.7516
voom	age	3. high exp genes	AVG	BON	LM	Measured	B	TC + CC	green	826.25	210.25	242.75	616	1069	50.8362	24.3798	22.9606	26.4563	73.7968
voom	age	3. high exp genes	LL	BON	LM	Measured	B	TC + CC	green	1069					72.9693
voom	age	3. high exp genes	LLS	BON	LM	Measured	B	TC + CC	green	654					26.4563
voom	age	3. high exp genes	NTR	BON	LM	Measured	B	TC + CC	green	966					73.7968
voom	age	3. high exp genes	RS	BON	LM	Measured	B	TC + CC	green	616					30.1222
voom	age	3. high exp genes	AVG	FDR	LM	Measured	B	TC + CC	green	1643	626	642	1017	2285	28.1272	14.281	15.0757	13.8462	43.2029
voom	age	3. high exp genes	LL	FDR	LM	Measured	B	TC + CC	green	2191					38.8751
voom	age	3. high exp genes	LLS	FDR	LM	Measured	B	TC + CC	green	1017					13.8462
voom	age	3. high exp genes	NTR	FDR	LM	Measured	B	TC + CC	green	2285					43.2029
voom	age	3. high exp genes	RS	FDR	LM	Measured	B	TC + CC	green	1079					16.5847
voom	bmi	3. high exp genes	AVG	BON	LM	Measured	B	TC + CC	green	936.5	259.5	172.5	677	1109	52.6743	24.4425	16.7684	28.2319	69.4427
voom	bmi	3. high exp genes	LL	BON	LM	Measured	B	TC + CC	green	677					28.2319
voom	bmi	3. high exp genes	LLS	BON	LM	Measured	B	TC + CC	green	1003					57.5445
voom	bmi	3. high exp genes	NTR	BON	LM	Measured	B	TC + CC	green	957					55.4783
voom	bmi	3. high exp genes	RS	BON	LM	Measured	B	TC + CC	green	1109					69.4427
voom	bmi	3. high exp genes	AVG	FDR	LM	Measured	B	TC + CC	green	1895	720	423	1175	2318	29.6851	13.3065	7.64777	16.3786	37.3329
voom	bmi	3. high exp genes	LL	FDR	LM	Measured	B	TC + CC	green	1175					16.3786
voom	bmi	3. high exp genes	LLS	FDR	LM	Measured	B	TC + CC	green	2106					34.0226
voom	bmi	3. high exp genes	NTR	FDR	LM	Measured	B	TC + CC	green	1981					31.0064
voom	bmi	3. high exp genes	RS	FDR	LM	Measured	B	TC + CC	green	2318					37.3329
voom	smoking	3. high exp genes	AVG	BON	LM	Measured	B	TC + CC	green	360.25	95.25	55.75	265	416	48.212	21.363	18.2417	26.849	66.4537
voom	smoking	3. high exp genes	LL	BON	LM	Measured	B	TC + CC	green	416					66.4537
voom	smoking	3. high exp genes	LLS	BON	LM	Measured	B	TC + CC	green	265					26.849
voom	smoking	3. high exp genes	NTR	BON	LM	Measured	B	TC + CC	green	405					56.7227
voom	smoking	3. high exp genes	RS	BON	LM	Measured	B	TC + CC	green	355					42.8227
voom	smoking	3. high exp genes	AVG	FDR	LM	Measured	B	TC + CC	green	754.25	364.25	254.75	390	1009	22.2511	12.8851	9.04546	9.36599	31.2965
voom	smoking	3. high exp genes	LL	FDR	LM	Measured	B	TC + CC	green	1009					31.2965
voom	smoking	3. high exp genes	LLS	FDR	LM	Measured	B	TC + CC	green	390					9.36599
voom	smoking	3. high exp genes	NTR	FDR	LM	Measured	B	TC + CC	green	962					30.5688
voom	smoking	3. high exp genes	RS	FDR	LM	Measured	B	TC + CC	green	656					17.773
voom	age	0. all exp genes	AVG	BON	LM	Measured	B	TC + CC	yellow	841.75	231.75	240.25	610	1082	53.7299	25.283	25.8521	28.4468	79.582
voom	age	0. all exp genes	LL	BON	LM	Measured	B	TC + CC	yellow	1082					77.5072
voom	age	0. all exp genes	LLS	BON	LM	Measured	B	TC + CC	yellow	685					28.4468
voom	age	0. all exp genes	NTR	BON	LM	Measured	B	TC + CC	yellow	990					79.582
voom	age	0. all exp genes	RS	BON	LM	Measured	B	TC + CC	yellow	610					29.3834
voom	age	0. all exp genes	AVG	FDR	LM	Measured	B	TC + CC	yellow	1672.5	609.5	617.5	1063	2290	29.6976	15.8141	16.2769	13.8835	45.9744
voom	age	0. all exp genes	LL	FDR	LM	Measured	B	TC + CC	yellow	2290					42.8919
voom	age	0. all exp genes	LLS	FDR	LM	Measured	B	TC + CC	yellow	1070					13.8835
voom	age	0. all exp genes	NTR	FDR	LM	Measured	B	TC + CC	yellow	2267					45.9744
voom	age	0. all exp genes	RS	FDR	LM	Measured	B	TC + CC	yellow	1063					16.0404
voom	bmi	0. all exp genes	AVG	BON	LM	Measured	B	TC + CC	yellow	880.5	229.5	148.5	651	1029	55.3218	25.4457	18.707	29.8761	74.0288
voom	bmi	0. all exp genes	LL	BON	LM	Measured	B	TC + CC	yellow	651					29.8761
voom	bmi	0. all exp genes	LLS	BON	LM	Measured	B	TC + CC	yellow	960					60.9524
voom	bmi	0. all exp genes	NTR	BON	LM	Measured	B	TC + CC	yellow	882					56.4299
voom	bmi	0. all exp genes	RS	BON	LM	Measured	B	TC + CC	yellow	1029					74.0288
voom	bmi	0. all exp genes	AVG	FDR	LM	Measured	B	TC + CC	yellow	1852.75	647.75	459.25	1205	2312	29.5163	13.272	9.31478	16.2443	38.831
voom	bmi	0. all exp genes	LL	FDR	LM	Measured	B	TC + CC	yellow	1205					16.2443
voom	bmi	0. all exp genes	LLS	FDR	LM	Measured	B	TC + CC	yellow	2003					34.9625
voom	bmi	0. all exp genes	NTR	FDR	LM	Measured	B	TC + CC	yellow	1891					28.0273
voom	bmi	0. all exp genes	RS	FDR	LM	Measured	B	TC + CC	yellow	2312					38.831
voom	smoking	0. all exp genes	AVG	BON	LM	Measured	B	TC + CC	yellow	354.25	86.25	54.75	268	409	51.2334	21.2222	18.2063	30.0112	69.4397
voom	smoking	0. all exp genes	LL	BON	LM	Measured	B	TC + CC	yellow	409					69.4397
voom	smoking	0. all exp genes	LLS	BON	LM	Measured	B	TC + CC	yellow	268					30.0112
voom	smoking	0. all exp genes	NTR	BON	LM	Measured	B	TC + CC	yellow	388					58.1709
voom	smoking	0. all exp genes	RS	BON	LM	Measured	B	TC + CC	yellow	352					47.3118
voom	smoking	0. all exp genes	AVG	FDR	LM	Measured	B	TC + CC	yellow	735.75	321.75	228.25	414	964	23.723	12.7006	10.5709	11.0224	34.2938
voom	smoking	0. all exp genes	LL	FDR	LM	Measured	B	TC + CC	yellow	964					34.2938
voom	smoking	0. all exp genes	LLS	FDR	LM	Measured	B	TC + CC	yellow	414					11.0224
voom	smoking	0. all exp genes	NTR	FDR	LM	Measured	B	TC + CC	yellow	870					28.7984
voom	smoking	0. all exp genes	RS	FDR	LM	Measured	B	TC + CC	yellow	695					20.7773
voom	age	0. all exp genes	AVG	BON	LM	Measured	C	TC + CC	yellow	841.75	231.75	240.25	610	1082	53.7299	25.283	25.8521	28.4468	79.582
voom	age	0. all exp genes	LL	BON	LM	Measured	C	TC + CC	yellow	1082					77.5072
voom	age	0. all exp genes	LLS	BON	LM	Measured	C	TC + CC	yellow	685					28.4468
voom	age	0. all exp genes	NTR	BON	LM	Measured	C	TC + CC	yellow	990					79.582
voom	age	0. all exp genes	RS	BON	LM	Measured	C	TC + CC	yellow	610					29.3834
voom	age	0. all exp genes	AVG	FDR	LM	Measured	C	TC + CC	yellow	1672.5	609.5	617.5	1063	2290	29.6976	15.8141	16.2769	13.8835	45.9744
voom	age	0. all exp genes	LL	FDR	LM	Measured	C	TC + CC	yellow	2290					42.8919
voom	age	0. all exp genes	LLS	FDR	LM	Measured	C	TC + CC	yellow	1070					13.8835
voom	age	0. all exp genes	NTR	FDR	LM	Measured	C	TC + CC	yellow	2267					45.9744
voom	age	0. all exp genes	RS	FDR	LM	Measured	C	TC + CC	yellow	1063					16.0404
voom	bmi	0. all exp genes	AVG	BON	LM	Measured	C	TC + CC	yellow	880.5	229.5	148.5	651	1029	55.3218	25.4457	18.707	29.8761	74.0288
voom	bmi	0. all exp genes	LL	BON	LM	Measured	C	TC + CC	yellow	651					29.8761
voom	bmi	0. all exp genes	LLS	BON	LM	Measured	C	TC + CC	yellow	960					60.9524
voom	bmi	0. all exp genes	NTR	BON	LM	Measured	C	TC + CC	yellow	882					56.4299
voom	bmi	0. all exp genes	RS	BON	LM	Measured	C	TC + CC	yellow	1029					74.0288
voom	bmi	0. all exp genes	AVG	FDR	LM	Measured	C	TC + CC	yellow	1852.75	647.75	459.25	1205	2312	29.5163	13.272	9.31478	16.2443	38.831
voom	bmi	0. all exp genes	LL	FDR	LM	Measured	C	TC + CC	yellow	1205					16.2443
voom	bmi	0. all exp genes	LLS	FDR	LM	Measured	C	TC + CC	yellow	2003					34.9625
voom	bmi	0. all exp genes	NTR	FDR	LM	Measured	C	TC + CC	yellow	1891					28.0273
voom	bmi	0. all exp genes	RS	FDR	LM	Measured	C	TC + CC	yellow	2312					38.831
voom	smoking	0. all exp genes	AVG	BON	LM	Measured	C	TC + CC	yellow	354.25	86.25	54.75	268	409	51.2334	21.2222	18.2063	30.0112	69.4397
voom	smoking	0. all exp genes	LL	BON	LM	Measured	C	TC + CC	yellow	409					69.4397
voom	smoking	0. all exp genes	LLS	BON	LM	Measured	C	TC + CC	yellow	268					30.0112
voom	smoking	0. all exp genes	NTR	BON	LM	Measured	C	TC + CC	yellow	388					58.1709
voom	smoking	0. all exp genes	RS	BON	LM	Measured	C	TC + CC	yellow	352					47.3118
voom	smoking	0. all exp genes	AVG	FDR	LM	Measured	C	TC + CC	yellow	735.75	321.75	228.25	414	964	23.723	12.7006	10.5709	11.0224	34.2938
voom	smoking	0. all exp genes	LL	FDR	LM	Measured	C	TC + CC	yellow	964					34.2938
voom	smoking	0. all exp genes	LLS	FDR	LM	Measured	C	TC + CC	yellow	414					11.0224
voom	smoking	0. all exp genes	NTR	FDR	LM	Measured	C	TC + CC	yellow	870					28.7984
voom	smoking	0. all exp genes	RS	FDR	LM	Measured	C	TC + CC	yellow	695					20.7773
voom	age	0. all exp genes	AVG	BON	LM	Measured	D	TC + CC	yellow	841.75	231.75	240.25	610	1082	53.7299	25.283	25.8521	28.4468	79.582
voom	age	0. all exp genes	LL	BON	LM	Measured	D	TC + CC	yellow	1082					77.5072
voom	age	0. all exp genes	LLS	BON	LM	Measured	D	TC + CC	yellow	685					28.4468
voom	age	0. all exp genes	NTR	BON	LM	Measured	D	TC + CC	yellow	990					79.582
voom	age	0. all exp genes	RS	BON	LM	Measured	D	TC + CC	yellow	610					29.3834
voom	age	0. all exp genes	AVG	FDR	LM	Measured	D	TC + CC	yellow	1672.5	609.5	617.5	1063	2290	29.6976	15.8141	16.2769	13.8835	45.9744
voom	age	0. all exp genes	LL	FDR	LM	Measured	D	TC + CC	yellow	2290					42.8919
voom	age	0. all exp genes	LLS	FDR	LM	Measured	D	TC + CC	yellow	1070					13.8835
voom	age	0. all exp genes	NTR	FDR	LM	Measured	D	TC + CC	yellow	2267					45.9744
voom	age	0. all exp genes	RS	FDR	LM	Measured	D	TC + CC	yellow	1063					16.0404
voom	bmi	0. all exp genes	AVG	BON	LM	Measured	D	TC + CC	yellow	880.5	229.5	148.5	651	1029	55.3218	25.4457	18.707	29.8761	74.0288
voom	bmi	0. all exp genes	LL	BON	LM	Measured	D	TC + CC	yellow	651					29.8761
voom	bmi	0. all exp genes	LLS	BON	LM	Measured	D	TC + CC	yellow	960					60.9524
voom	bmi	0. all exp genes	NTR	BON	LM	Measured	D	TC + CC	yellow	882					56.4299
voom	bmi	0. all exp genes	RS	BON	LM	Measured	D	TC + CC	yellow	1029					74.0288
voom	bmi	0. all exp genes	AVG	FDR	LM	Measured	D	TC + CC	yellow	1852.75	647.75	459.25	1205	2312	29.5163	13.272	9.31478	16.2443	38.831
voom	bmi	0. all exp genes	LL	FDR	LM	Measured	D	TC + CC	yellow	1205					16.2443
voom	bmi	0. all exp genes	LLS	FDR	LM	Measured	D	TC + CC	yellow	2003					34.9625
voom	bmi	0. all exp genes	NTR	FDR	LM	Measured	D	TC + CC	yellow	1891					28.0273
voom	bmi	0. all exp genes	RS	FDR	LM	Measured	D	TC + CC	yellow	2312					38.831
voom	smoking	0. all exp genes	AVG	BON	LM	Measured	D	TC + CC	yellow	354.25	86.25	54.75	268	409	51.2334	21.2222	18.2063	30.0112	69.4397
voom	smoking	0. all exp genes	LL	BON	LM	Measured	D	TC + CC	yellow	409					69.4397
voom	smoking	0. all exp genes	LLS	BON	LM	Measured	D	TC + CC	yellow	268					30.0112
voom	smoking	0. all exp genes	NTR	BON	LM	Measured	D	TC + CC	yellow	388					58.1709
voom	smoking	0. all exp genes	RS	BON	LM	Measured	D	TC + CC	yellow	352					47.3118
voom	smoking	0. all exp genes	AVG	FDR	LM	Measured	D	TC + CC	yellow	735.75	321.75	228.25	414	964	23.723	12.7006	10.5709	11.0224	34.2938
voom	smoking	0. all exp genes	LL	FDR	LM	Measured	D	TC + CC	yellow	964					34.2938
voom	smoking	0. all exp genes	LLS	FDR	LM	Measured	D	TC + CC	yellow	414					11.0224
voom	smoking	0. all exp genes	NTR	FDR	LM	Measured	D	TC + CC	yellow	870					28.7984
voom	smoking	0. all exp genes	RS	FDR	LM	Measured	D	TC + CC	yellow	695					20.7773
deseq	age_tert	0. all exp genes	AVG	BON	LM	Measured	A	TC + CC	blue	516.5	156.5	90.5	360	607	50.7463	24.8656	25.034	25.8807	75.7803
deseq	age_tert	0. all exp genes	LL	BON	LM	Measured	A	TC + CC	blue	602					64.9407
deseq	age_tert	0. all exp genes	LLS	BON	LM	Measured	A	TC + CC	blue	497					36.3836
deseq	age_tert	0. all exp genes	NTR	BON	LM	Measured	A	TC + CC	blue	607					75.7803
deseq	age_tert	0. all exp genes	RS	BON	LM	Measured	A	TC + CC	blue	360					25.8807
deseq	bmi_tert	0. all exp genes	AVG	BON	LM	Measured	A	TC + CC	blue	652.75	156.75	139.25	496	792	51.9999	22.5986	16.9897	29.4013	68.9895
deseq	bmi_tert	0. all exp genes	LL	BON	LM	Measured	A	TC + CC	blue	496					29.4013
deseq	bmi_tert	0. all exp genes	LLS	BON	LM	Measured	A	TC + CC	blue	762					65.7463
deseq	bmi_tert	0. all exp genes	NTR	BON	LM	Measured	A	TC + CC	blue	561					43.8624
deseq	bmi_tert	0. all exp genes	RS	BON	LM	Measured	A	TC + CC	blue	792					68.9895
edger	age_tert	0. all exp genes	AVG	BON	LM	Measured	A	TC + CC	red	518.75	160.75	96.25	358	615	50.5607	24.8976	26.1226	25.6631	76.6833
edger	age_tert	0. all exp genes	LL	BON	LM	Measured	A	TC + CC	red	608					64.2027
edger	age_tert	0. all exp genes	LLS	BON	LM	Measured	A	TC + CC	red	494					35.6936
edger	age_tert	0. all exp genes	NTR	BON	LM	Measured	A	TC + CC	red	615					76.6833
edger	age_tert	0. all exp genes	RS	BON	LM	Measured	A	TC + CC	red	358					25.6631
edger	bmi_tert	0. all exp genes	AVG	BON	LM	Measured	A	TC + CC	red	644	153	148	491	792	51.9419	22.4878	17.2284	29.4541	69.1703
edger	bmi_tert	0. all exp genes	LL	BON	LM	Measured	A	TC + CC	red	491					29.4541
edger	bmi_tert	0. all exp genes	LLS	BON	LM	Measured	A	TC + CC	red	749					65.1304
edger	bmi_tert	0. all exp genes	NTR	BON	LM	Measured	A	TC + CC	red	544					44.0129
edger	bmi_tert	0. all exp genes	RS	BON	LM	Measured	A	TC + CC	red	792					69.1703
edger	age_tert	1. low-high exp genes	AVG	BON	GLM	Measured	C	TC + CC	blue	515.75	170.75	99.25	345	615	47.2088	22.9983	23.4067	24.2105	70.6156
edger	age_tert	1. low-high exp genes	LL	BON	GLM	Measured	C	TC + CC	blue	615					60.0586
edger	age_tert	1. low-high exp genes	LLS	BON	GLM	Measured	C	TC + CC	blue	495					33.9506
edger	age_tert	1. low-high exp genes	NTR	BON	GLM	Measured	C	TC + CC	blue	608					70.6156
edger	age_tert	1. low-high exp genes	RS	BON	GLM	Measured	C	TC + CC	blue	345					24.2105
edger	age_tert	1. low-high exp genes	AVG	BON	glmQLF	Measured	C	TC + CC	green	311.5	96.5	85.5	215	397	46.3536	22.5177	28.1234	23.8359	74.477
edger	age_tert	1. low-high exp genes	LL	BON	glmQLF	Measured	C	TC + CC	green	397					59.0774
edger	age_tert	1. low-high exp genes	LLS	BON	glmQLF	Measured	C	TC + CC	green	278					28.0242
edger	age_tert	1. low-high exp genes	NTR	BON	glmQLF	Measured	C	TC + CC	green	356					74.477
edger	age_tert	1. low-high exp genes	RS	BON	glmQLF	Measured	C	TC + CC	green	215					23.8359
edger	bmi_tert	1. low-high exp genes	AVG	BON	GLM	Measured	C	TC + CC	blue	741.75	190.75	142.25	551	884	50.4595	21.7466	14.6932	28.7129	65.1526
edger	bmi_tert	1. low-high exp genes	LL	BON	GLM	Measured	C	TC + CC	blue	551					28.7129
edger	bmi_tert	1. low-high exp genes	LLS	BON	GLM	Measured	C	TC + CC	blue	875					65.1526
edger	bmi_tert	1. low-high exp genes	NTR	BON	GLM	Measured	C	TC + CC	blue	657					44.5122
edger	bmi_tert	1. low-high exp genes	RS	BON	GLM	Measured	C	TC + CC	blue	884					63.4602
edger	bmi_tert	1. low-high exp genes	AVG	BON	glmQLF	Measured	C	TC + CC	green	594.5	88.5	86.5	506	681	51.1816	13.9378	15.912	37.2438	67.0936
edger	bmi_tert	1. low-high exp genes	LL	BON	glmQLF	Measured	C	TC + CC	green	527					37.2438
edger	bmi_tert	1. low-high exp genes	LLS	BON	glmQLF	Measured	C	TC + CC	green	681					67.0936
edger	bmi_tert	1. low-high exp genes	NTR	BON	glmQLF	Measured	C	TC + CC	green	506					41.7836
edger	bmi_tert	1. low-high exp genes	RS	BON	glmQLF	Measured	C	TC + CC	green	664					58.6055
voom	age_tert	0. all exp genes	AVG	BON	LM	Measured	D	5PC	green	213.25	176.25	132.75	37	346	45.0891	41.8801	40.9979	3.20902	86.087
voom	age_tert	0. all exp genes	LL	BON	LM	Measured	D	5PC	green	346					73.9316
voom	age_tert	0. all exp genes	LLS	BON	LM	Measured	D	5PC	green	173					17.1287
voom	age_tert	0. all exp genes	NTR	BON	LM	Measured	D	5PC	green	297					86.087
voom	age_tert	0. all exp genes	RS	BON	LM	Measured	D	5PC	green	37					3.20902
voom	age_tert	0. all exp genes	AVG	BON	LM	Measured	D	CC	red	619.25	135.25	92.75	484	712	47.3268	22.0527	21.532	25.2742	68.8588
voom	age_tert	0. all exp genes	LL	BON	LM	Measured	D	CC	red	695					56.0032
voom	age_tert	0. all exp genes	LLS	BON	LM	Measured	D	CC	red	484					25.2742
voom	age_tert	0. all exp genes	NTR	BON	LM	Measured	D	CC	red	712					68.8588
voom	age_tert	0. all exp genes	RS	BON	LM	Measured	D	CC	red	586					39.1711
voom	age_tert	0. all exp genes	AVG	BON	LM	Measured	D	TC+CC+5HC	purple	493.75	368.75	254.25	125	748	46.6609	44.5699	41.6544	2.091	88.3152
voom	age_tert	0. all exp genes	LL	BON	LM	Measured	D	TC+CC+5HC	purple	748					71.9231
voom	age_tert	0. all exp genes	LLS	BON	LM	Measured	D	TC+CC+5HC	purple	452					24.3141
voom	age_tert	0. all exp genes	NTR	BON	LM	Measured	D	TC+CC+5HC	purple	650					88.3152
voom	age_tert	0. all exp genes	RS	BON	LM	Measured	D	TC+CC+5HC	purple	125					2.091
voom	age_tert	0. all exp genes	AVG	BON	LM	Measured	D	TC	blue	678	153	134	525	812	50.3433	21.9955	26.6966	28.3477	77.0398
voom	age_tert	0. all exp genes	LL	BON	LM	Measured	D	TC	blue	787					59.4411
voom	age_tert	0. all exp genes	LLS	BON	LM	Measured	D	TC	blue	525					28.3477
voom	age_tert	0. all exp genes	NTR	BON	LM	Measured	D	TC	blue	812					77.0398
voom	age_tert	0. all exp genes	RS	BON	LM	Measured	D	TC	blue	588					36.5444
voom	age_tert	0. all exp genes	AVG	BON	LM	Measured	A	TC + CC	yellow	558	172	106	386	664	49.7785	24.5498	25.7619	25.2288	75.5404
voom	age_tert	0. all exp genes	LL	BON	LM	Measured	A	TC + CC	yellow	662					64.775
voom	age_tert	0. all exp genes	LLS	BON	LM	Measured	A	TC + CC	yellow	520					33.57
voom	age_tert	0. all exp genes	NTR	BON	LM	Measured	A	TC + CC	yellow	664					75.5404
voom	age_tert	0. all exp genes	RS	BON	LM	Measured	A	TC + CC	yellow	386					25.2288
voom	age_tert	0. all exp genes	AVG	BON	VlmF	Measured	C	TC + CC	red	608	165	110	443	718	50.2798	22.73	24.1243	27.5498	74.4041
voom	age_tert	0. all exp genes	LL	BON	VlmF	Measured	C	TC + CC	red	714					66.05
voom	age_tert	0. all exp genes	LLS	BON	VlmF	Measured	C	TC + CC	red	557					33.1153
voom	age_tert	0. all exp genes	NTR	BON	VlmF	Measured	C	TC + CC	red	718					74.4041
voom	age_tert	0. all exp genes	RS	BON	VlmF	Measured	C	TC + CC	red	443					27.5498
voom	bmi_tert	0. all exp genes	AVG	BON	LM	Measured	D	5PC	green	311.25	33.25	48.75	278	360	47.0548	14.3354	35.137	32.7194	82.1918
voom	bmi_tert	0. all exp genes	LL	BON	LM	Measured	D	5PC	green	360					82.1918
voom	bmi_tert	0. all exp genes	LLS	BON	LM	Measured	D	5PC	green	278					33.9024
voom	bmi_tert	0. all exp genes	NTR	BON	LM	Measured	D	5PC	green	302					32.7194
voom	bmi_tert	0. all exp genes	RS	BON	LM	Measured	D	5PC	green	305					39.4057
voom	bmi_tert	0. all exp genes	AVG	BON	LM	Measured	D	CC	red	910	40	25	870	935	51.2673	6.54198	6.97585	44.7253	58.2432
voom	bmi_tert	0. all exp genes	LL	BON	LM	Measured	D	CC	red	935					52.5281
voom	bmi_tert	0. all exp genes	LLS	BON	LM	Measured	D	CC	red	915					58.2432
voom	bmi_tert	0. all exp genes	NTR	BON	LM	Measured	D	CC	red	870					49.5726
voom	bmi_tert	0. all exp genes	RS	BON	LM	Measured	D	CC	red	920					44.7253
voom	bmi_tert	0. all exp genes	AVG	BON	LM	Measured	D	TC+CC+5HC	purple	457.5	157.5	79.5	300	537	50.3002	29.4378	37.4449	20.8623	87.7451
voom	bmi_tert	0. all exp genes	LL	BON	LM	Measured	D	TC+CC+5HC	purple	537					87.7451
voom	bmi_tert	0. all exp genes	LLS	BON	LM	Measured	D	TC+CC+5HC	purple	300					20.8623
voom	bmi_tert	0. all exp genes	NTR	BON	LM	Measured	D	TC+CC+5HC	purple	486					46.4183
voom	bmi_tert	0. all exp genes	RS	BON	LM	Measured	D	TC+CC+5HC	purple	507					46.1749
voom	bmi_tert	0. all exp genes	AVG	BON	LM	Measured	D	TC	blue	789.25	67.25	86.75	722	876	52.9087	10.1109	5.37469	42.7979	58.2834
voom	bmi_tert	0. all exp genes	LL	BON	LM	Measured	D	TC	blue	722					42.7979
voom	bmi_tert	0. all exp genes	LLS	BON	LM	Measured	D	TC	blue	809					54.3318
voom	bmi_tert	0. all exp genes	NTR	BON	LM	Measured	D	TC	blue	750					56.2219
voom	bmi_tert	0. all exp genes	RS	BON	LM	Measured	D	TC	blue	876					58.2834
voom	bmi_tert	0. all exp genes	AVG	BON	LM	Measured	A	TC + CC	yellow	692	142	124	550	816	52.7691	20.53	15.5154	32.2392	68.2845
voom	bmi_tert	0. all exp genes	LL	BON	LM	Measured	A	TC + CC	yellow	550					32.2392
voom	bmi_tert	0. all exp genes	LLS	BON	LM	Measured	A	TC + CC	yellow	813					66.8586
voom	bmi_tert	0. all exp genes	NTR	BON	LM	Measured	A	TC + CC	yellow	589					43.6944
voom	bmi_tert	0. all exp genes	RS	BON	LM	Measured	A	TC + CC	yellow	816					68.2845
voom	bmi_tert	0. all exp genes	AVG	BON	VlmF	Measured	C	TC + CC	red	659.75	131.75	101.25	528	761	51.1778	19.1389	14.3692	32.0388	65.5469
voom	bmi_tert	0. all exp genes	LL	BON	VlmF	Measured	C	TC + CC	red	528					32.0388
voom	bmi_tert	0. all exp genes	LLS	BON	VlmF	Measured	C	TC + CC	red	756					63.1579
voom	bmi_tert	0. all exp genes	NTR	BON	VlmF	Measured	C	TC + CC	red	594					43.9674
voom	bmi_tert	0. all exp genes	RS	BON	VlmF	Measured	C	TC + CC	red	761					65.5469
voom	age_tert	1. low-high exp genes	AVG	BON	LM	Measured	B	TC + CC	blue	594.25	189.25	126.75	405	721	48.5387	23.8737	25.3342	24.665	73.873
voom	age_tert	1. low-high exp genes	LL	BON	LM	Measured	B	TC + CC	blue	700					62.7803
voom	age_tert	1. low-high exp genes	LLS	BON	LM	Measured	B	TC + CC	blue	551					32.8367
voom	age_tert	1. low-high exp genes	NTR	BON	LM	Measured	B	TC + CC	blue	721					73.873
voom	age_tert	1. low-high exp genes	RS	BON	LM	Measured	B	TC + CC	blue	405					24.665
voom	bmi_tert	1. low-high exp genes	AVG	BON	LM	Measured	B	TC + CC	blue	752	171	134	581	886	51.0671	20.1793	14.1983	30.8878	65.2655
voom	bmi_tert	1. low-high exp genes	LL	BON	LM	Measured	B	TC + CC	blue	581					30.8878
voom	bmi_tert	1. low-high exp genes	LLS	BON	LM	Measured	B	TC + CC	blue	886					64.6715
voom	bmi_tert	1. low-high exp genes	NTR	BON	LM	Measured	B	TC + CC	blue	656					43.4437
voom	bmi_tert	1. low-high exp genes	RS	BON	LM	Measured	B	TC + CC	blue	885					65.2655
voom	age_tert	2. med-high exp genes	AVG	BON	LM	Measured	B	TC + CC	red	594.5	192.5	122.5	402	717	48.246	23.838	24.694	24.408	72.94
voom	age_tert	2. med-high exp genes	LL	BON	LM	Measured	B	TC + CC	red	706					62.6998
voom	age_tert	2. med-high exp genes	LLS	BON	LM	Measured	B	TC + CC	red	553					32.9363
voom	age_tert	2. med-high exp genes	NTR	BON	LM	Measured	B	TC + CC	red	717					72.94
voom	age_tert	2. med-high exp genes	RS	BON	LM	Measured	B	TC + CC	red	402					24.408
voom	bmi_tert	2. med-high exp genes	AVG	BON	LM	Measured	B	TC + CC	red	750.25	173.25	140.75	577	891	50.7086	19.7371	13.8594	30.9716	64.5681
voom	bmi_tert	2. med-high exp genes	LL	BON	LM	Measured	B	TC + CC	red	577					30.9716
voom	bmi_tert	2. med-high exp genes	LLS	BON	LM	Measured	B	TC + CC	red	891					64.2394
voom	bmi_tert	2. med-high exp genes	NTR	BON	LM	Measured	B	TC + CC	red	651					43.0556
voom	bmi_tert	2. med-high exp genes	RS	BON	LM	Measured	B	TC + CC	red	882					64.5681
voom	age_tert	3. high exp genes	AVG	BON	LM	Measured	B	TC + CC	green	552	170	108	382	660	47.2141	21.628	23.2988	25.5861	70.5128
voom	age_tert	3. high exp genes	LL	BON	LM	Measured	B	TC + CC	green	644					59.7403
voom	age_tert	3. high exp genes	LLS	BON	LM	Measured	B	TC + CC	green	522					33.0171
voom	age_tert	3. high exp genes	NTR	BON	LM	Measured	B	TC + CC	green	660					70.5128
voom	age_tert	3. high exp genes	RS	BON	LM	Measured	B	TC + CC	green	382					25.5861
voom	bmi_tert	3. high exp genes	AVG	BON	LM	Measured	B	TC + CC	green	749.5	173.5	130.5	576	880	50.2114	19.9593	13.007	30.2521	63.2184
voom	bmi_tert	3. high exp genes	LL	BON	LM	Measured	B	TC + CC	green	576					30.2521
voom	bmi_tert	3. high exp genes	LLS	BON	LM	Measured	B	TC + CC	green	880					63.2184
voom	bmi_tert	3. high exp genes	NTR	BON	LM	Measured	B	TC + CC	green	669					44.8391
voom	bmi_tert	3. high exp genes	RS	BON	LM	Measured	B	TC + CC	green	873					62.5358
voom	age_tert	0. all exp genes	AVG	BON	LM	Measured	B	TC + CC	yellow	558	172	106	386	664	49.7785	24.5498	25.7619	25.2288	75.5404
voom	age_tert	0. all exp genes	LL	BON	LM	Measured	B	TC + CC	yellow	662					64.775
voom	age_tert	0. all exp genes	LLS	BON	LM	Measured	B	TC + CC	yellow	520					33.57
voom	age_tert	0. all exp genes	NTR	BON	LM	Measured	B	TC + CC	yellow	664					75.5404
voom	age_tert	0. all exp genes	RS	BON	LM	Measured	B	TC + CC	yellow	386					25.2288
voom	bmi_tert	0. all exp genes	AVG	BON	LM	Measured	B	TC + CC	yellow	692	142	124	550	816	52.7691	20.53	15.5154	32.2392	68.2845
voom	bmi_tert	0. all exp genes	LL	BON	LM	Measured	B	TC + CC	yellow	550					32.2392
voom	bmi_tert	0. all exp genes	LLS	BON	LM	Measured	B	TC + CC	yellow	813					66.8586
voom	bmi_tert	0. all exp genes	NTR	BON	LM	Measured	B	TC + CC	yellow	589					43.6944
voom	bmi_tert	0. all exp genes	RS	BON	LM	Measured	B	TC + CC	yellow	816					68.2845
voom	age_tert	0. all exp genes	AVG	BON	LM	Measured	C	TC + CC	yellow	558	172	106	386	664	49.7785	24.5498	25.7619	25.2288	75.5404
voom	age_tert	0. all exp genes	LL	BON	LM	Measured	C	TC + CC	yellow	662					64.775
voom	age_tert	0. all exp genes	LLS	BON	LM	Measured	C	TC + CC	yellow	520					33.57
voom	age_tert	0. all exp genes	NTR	BON	LM	Measured	C	TC + CC	yellow	664					75.5404
voom	age_tert	0. all exp genes	RS	BON	LM	Measured	C	TC + CC	yellow	386					25.2288
voom	bmi_tert	0. all exp genes	AVG	BON	LM	Measured	C	TC + CC	yellow	692	142	124	550	816	52.7691	20.53	15.5154	32.2392	68.2845
voom	bmi_tert	0. all exp genes	LL	BON	LM	Measured	C	TC + CC	yellow	550					32.2392
voom	bmi_tert	0. all exp genes	LLS	BON	LM	Measured	C	TC + CC	yellow	813					66.8586
voom	bmi_tert	0. all exp genes	NTR	BON	LM	Measured	C	TC + CC	yellow	589					43.6944
voom	bmi_tert	0. all exp genes	RS	BON	LM	Measured	C	TC + CC	yellow	816					68.2845
voom	age_tert	0. all exp genes	AVG	BON	LM	Measured	D	TC + CC	yellow	558	172	106	386	664	49.7785	24.5498	25.7619	25.2288	75.5404
voom	age_tert	0. all exp genes	LL	BON	LM	Measured	D	TC + CC	yellow	662					64.775
voom	age_tert	0. all exp genes	LLS	BON	LM	Measured	D	TC + CC	yellow	520					33.57
voom	age_tert	0. all exp genes	NTR	BON	LM	Measured	D	TC + CC	yellow	664					75.5404
voom	age_tert	0. all exp genes	RS	BON	LM	Measured	D	TC + CC	yellow	386					25.2288
voom	bmi_tert	0. all exp genes	AVG	BON	LM	Measured	D	TC + CC	yellow	692	142	124	550	816	52.7691	20.53	15.5154	32.2392	68.2845
voom	bmi_tert	0. all exp genes	LL	BON	LM	Measured	D	TC + CC	yellow	550					32.2392
voom	bmi_tert	0. all exp genes	LLS	BON	LM	Measured	D	TC + CC	yellow	813					66.8586
voom	bmi_tert	0. all exp genes	NTR	BON	LM	Measured	D	TC + CC	yellow	589					43.6944
voom	bmi_tert	0. all exp genes	RS	BON	LM	Measured	D	TC + CC	yellow	816					68.2845
deseq	age	0. all exp genes	AVG	LOW	LM	Measured	A	TC + CC	blue	1872.25	770.25	821.75	1102	2694	18.6413	8.85407	9.60658	9.78723	28.2479
deseq	age	0. all exp genes	LL	LOW	LM	Measured	A	TC + CC	blue	2543					26.2951
deseq	age	0. all exp genes	LLS	LOW	LM	Measured	A	TC + CC	blue	1150					9.78723
deseq	age	0. all exp genes	NTR	LOW	LM	Measured	A	TC + CC	blue	2694					28.2479
deseq	age	0. all exp genes	RS	LOW	LM	Measured	A	TC + CC	blue	1102					10.235
deseq	age	0. all exp genes	AVG	HI	LM	Measured	A	TC + CC	blue	445.25	73.25	73.75	372	519	66.195	26.913	25.9262	39.2819	92.1212
deseq	age	0. all exp genes	LL	HI	LM	Measured	A	TC + CC	blue	519					90.5759
deseq	age	0. all exp genes	LLS	HI	LM	Measured	A	TC + CC	blue	434					42.8008
deseq	age	0. all exp genes	NTR	HI	LM	Measured	A	TC + CC	blue	456					92.1212
deseq	age	0. all exp genes	RS	HI	LM	Measured	A	TC + CC	blue	372					39.2819
edger	age	0. all exp genes	AVG	LOW	LM	Measured	A	TC + CC	red	1891.25	767.25	838.75	1124	2730	18.7676	9.20544	9.78587	9.56219	28.5535
edger	age	0. all exp genes	LL	LOW	LM	Measured	A	TC + CC	red	2584					26.557
edger	age	0. all exp genes	LLS	LOW	LM	Measured	A	TC + CC	red	1127					9.56219
edger	age	0. all exp genes	NTR	LOW	LM	Measured	A	TC + CC	red	2730					28.5535
edger	age	0. all exp genes	RS	LOW	LM	Measured	A	TC + CC	red	1124					10.3978
edger	age	0. all exp genes	AVG	HI	LM	Measured	A	TC + CC	red	453	68	78	385	531	66.5388	26.3089	25.0612	40.2299	91.6
edger	age	0. all exp genes	LL	HI	LM	Measured	A	TC + CC	red	531					91.5517
edger	age	0. all exp genes	LLS	HI	LM	Measured	A	TC + CC	red	438					42.7734
edger	age	0. all exp genes	NTR	HI	LM	Measured	A	TC + CC	red	458					91.6
edger	age	0. all exp genes	RS	HI	LM	Measured	A	TC + CC	red	385					40.2299
edger	age	1. low-high exp genes	AVG	LOW	GLM	Measured	C	TC + CC	blue	1663	686	751	977	2414	24.4408	12.2633	13.557	12.1775	37.9978
edger	age	1. low-high exp genes	LL	LOW	GLM	Measured	C	TC + CC	blue	2216					33.2983
edger	age	1. low-high exp genes	LLS	LOW	GLM	Measured	C	TC + CC	blue	977					12.1775
edger	age	1. low-high exp genes	NTR	LOW	GLM	Measured	C	TC + CC	blue	2414					37.9978
edger	age	1. low-high exp genes	RS	LOW	GLM	Measured	C	TC + CC	blue	1045					14.2896
edger	age	1. low-high exp genes	AVG	HI	GLM	Measured	C	TC + CC	blue	446	80	80	366	526	64.5392	25.0143	24.8431	39.5248	89.3822
edger	age	1. low-high exp genes	LL	HI	GLM	Measured	C	TC + CC	blue	526					87.9599
edger	age	1. low-high exp genes	LLS	HI	GLM	Measured	C	TC + CC	blue	429					41.2897
edger	age	1. low-high exp genes	NTR	HI	GLM	Measured	C	TC + CC	blue	463					89.3822
edger	age	1. low-high exp genes	RS	HI	GLM	Measured	C	TC + CC	blue	366					39.5248
edger	age	1. low-high exp genes	AVG	LOW	glmQLF	Measured	C	TC + CC	green	1102.5	523.5	654.5	579	1757	23.291	13.5139	18.3047	9.7771	41.5956
edger	age	1. low-high exp genes	LL	LOW	glmQLF	Measured	C	TC + CC	green	1386					28.7731
edger	age	1. low-high exp genes	LLS	LOW	glmQLF	Measured	C	TC + CC	green	579					9.7771
edger	age	1. low-high exp genes	NTR	LOW	glmQLF	Measured	C	TC + CC	green	1757					41.5956
edger	age	1. low-high exp genes	RS	LOW	glmQLF	Measured	C	TC + CC	green	688					13.018
edger	age	1. low-high exp genes	AVG	HI	glmQLF	Measured	C	TC + CC	green	273	21	61	252	334	65.7015	28.8211	26.9725	36.8805	92.674
edger	age	1. low-high exp genes	LL	HI	glmQLF	Measured	C	TC + CC	green	334					90.027
edger	age	1. low-high exp genes	LLS	HI	glmQLF	Measured	C	TC + CC	green	253					36.8805
edger	age	1. low-high exp genes	NTR	HI	glmQLF	Measured	C	TC + CC	green	253					92.674
edger	age	1. low-high exp genes	RS	HI	glmQLF	Measured	C	TC + CC	green	252					43.2247
voom	age	0. all exp genes	AVG	LOW	LM	Measured	D	5PC	green	1392.75	1193.75	993.25	199	2386	16.9905	15.0041	13.5993	1.98642	30.5897
voom	age	0. all exp genes	LL	LOW	LM	Measured	D	5PC	green	2260					28.1025
voom	age	0. all exp genes	LLS	LOW	LM	Measured	D	5PC	green	726					7.28331
voom	age	0. all exp genes	NTR	LOW	LM	Measured	D	5PC	green	2386					30.5897
voom	age	0. all exp genes	RS	LOW	LM	Measured	D	5PC	green	199					1.98642
voom	age	0. all exp genes	AVG	LOW	LM	Measured	D	CC	red	2797	1656	1172	1141	3969	22.1939	14.3282	10.3976	7.86571	32.5916
voom	age	0. all exp genes	LL	LOW	LM	Measured	D	CC	red	3969					32.5916
voom	age	0. all exp genes	LLS	LOW	LM	Measured	D	CC	red	1141					7.86571
voom	age	0. all exp genes	NTR	LOW	LM	Measured	D	CC	red	3789					31.1544
voom	age	0. all exp genes	RS	LOW	LM	Measured	D	CC	red	2289					17.1641
voom	age	0. all exp genes	AVG	LOW	LM	Measured	D	TC+CC+5HC	purple	2053.75	877.75	931.25	1176	2985	19.3463	9.56996	10.0509	9.77637	29.3973
voom	age	0. all exp genes	LL	LOW	LM	Measured	D	TC+CC+5HC	purple	2867					27.7166
voom	age	0. all exp genes	LLS	LOW	LM	Measured	D	TC+CC+5HC	purple	1176					9.77637
voom	age	0. all exp genes	NTR	LOW	LM	Measured	D	TC+CC+5HC	purple	2985					29.3973
voom	age	0. all exp genes	RS	LOW	LM	Measured	D	TC+CC+5HC	purple	1187					10.4951
voom	age	0. all exp genes	AVG	LOW	LM	Measured	D	TC	blue	2401.25	1307.25	857.75	1094	3259	21.2197	12.5282	8.63824	8.69151	29.858
voom	age	0. all exp genes	LL	LOW	LM	Measured	D	TC	blue	3259					29.858
voom	age	0. all exp genes	LLS	LOW	LM	Measured	D	TC	blue	1094					8.69151
voom	age	0. all exp genes	NTR	LOW	LM	Measured	D	TC	blue	3047					26.9312
voom	age	0. all exp genes	RS	LOW	LM	Measured	D	TC	blue	2205					19.3983
voom	age	0. all exp genes	AVG	LOW	LM	Measured	A	TC + CC	yellow	2048.5	858.5	913.5	1190	2962	19.397	9.47873	10.0054	9.91832	29.4024
voom	age	0. all exp genes	LL	LOW	LM	Measured	A	TC + CC	yellow	2804					27.2365
voom	age	0. all exp genes	LLS	LOW	LM	Measured	A	TC + CC	yellow	1190					9.91832
voom	age	0. all exp genes	NTR	LOW	LM	Measured	A	TC + CC	yellow	2962					29.4024
voom	age	0. all exp genes	RS	LOW	LM	Measured	A	TC + CC	yellow	1238					11.0309
voom	age	0. all exp genes	AVG	HI	LM	Measured	D	5PC	green	189.25	114.25	89.75	75	279	55.9264	47.4518	40.387	8.47458	96.3134
voom	age	0. all exp genes	LL	HI	LM	Measured	D	5PC	green	279					93.6242
voom	age	0. all exp genes	LLS	HI	LM	Measured	D	5PC	green	194					25.2934
voom	age	0. all exp genes	NTR	HI	LM	Measured	D	5PC	green	209					96.3134
voom	age	0. all exp genes	RS	HI	LM	Measured	D	5PC	green	75					8.47458
voom	age	0. all exp genes	AVG	HI	LM	Measured	D	CC	red	532.5	100.5	81.5	432	614	64.9241	36.5962	27.2793	28.3279	92.2034
voom	age	0. all exp genes	LL	HI	LM	Measured	D	CC	red	614					87.5892
voom	age	0. all exp genes	LLS	HI	LM	Measured	D	CC	red	432					28.3279
voom	age	0. all exp genes	NTR	HI	LM	Measured	D	CC	red	544					92.2034
voom	age	0. all exp genes	RS	HI	LM	Measured	D	CC	red	540					51.5759
voom	age	0. all exp genes	AVG	HI	LM	Measured	D	TC+CC+5HC	purple	488	76	75	412	563	66.4688	27.6009	26.8273	38.8679	93.2961
voom	age	0. all exp genes	LL	HI	LM	Measured	D	TC+CC+5HC	purple	563					91.9935
voom	age	0. all exp genes	LLS	HI	LM	Measured	D	TC+CC+5HC	purple	476					41.7178
voom	age	0. all exp genes	NTR	HI	LM	Measured	D	TC+CC+5HC	purple	501					93.2961
voom	age	0. all exp genes	RS	HI	LM	Measured	D	TC+CC+5HC	purple	412					38.8679
voom	age	0. all exp genes	AVG	HI	LM	Measured	D	TC	blue	554.5	73.5	60.5	481	615	67.7863	30.7579	25.9637	37.0285	93.75
voom	age	0. all exp genes	LL	HI	LM	Measured	D	TC	blue	615					93.75
voom	age	0. all exp genes	LLS	HI	LM	Measured	D	TC	blue	481					37.0285
voom	age	0. all exp genes	NTR	HI	LM	Measured	D	TC	blue	578					90.5956
voom	age	0. all exp genes	RS	HI	LM	Measured	D	TC	blue	544					49.7713
voom	age	0. all exp genes	AVG	HI	LM	Measured	A	TC + CC	yellow	489.75	74.75	71.25	415	561	66.08	27.0762	26.8568	39.0038	92.9368
voom	age	0. all exp genes	LL	HI	LM	Measured	A	TC + CC	yellow	561					90.0482
voom	age	0. all exp genes	LLS	HI	LM	Measured	A	TC + CC	yellow	483					42.3313
voom	age	0. all exp genes	NTR	HI	LM	Measured	A	TC + CC	yellow	500					92.9368
voom	age	0. all exp genes	RS	HI	LM	Measured	A	TC + CC	yellow	415					39.0038
voom	age	0. all exp genes	AVG	LOW	VlmF	Measured	C	TC + CC	red	2202.5	930.5	903.5	1272	3106	17.6307	9.29463	7.29307	8.33606	24.9238
voom	age	0. all exp genes	LL	LOW	VlmF	Measured	C	TC + CC	red	2956					24.9094
voom	age	0. all exp genes	LLS	LOW	VlmF	Measured	C	TC + CC	red	1272					8.33606
voom	age	0. all exp genes	NTR	LOW	VlmF	Measured	C	TC + CC	red	3106					24.9238
voom	age	0. all exp genes	RS	LOW	VlmF	Measured	C	TC + CC	red	1476					12.3535
voom	age	0. all exp genes	AVG	HI	VlmF	Measured	C	TC + CC	red	520.5	61.5	69.5	459	590	66.1522	25.6489	26.8792	40.5032	93.0314
voom	age	0. all exp genes	LL	HI	VlmF	Measured	C	TC + CC	red	590					88.4558
voom	age	0. all exp genes	LLS	HI	VlmF	Measured	C	TC + CC	red	499					40.5032
voom	age	0. all exp genes	NTR	HI	VlmF	Measured	C	TC + CC	red	534					93.0314
voom	age	0. all exp genes	RS	HI	VlmF	Measured	C	TC + CC	red	459					42.6184
voom	age	1. low-high exp genes	AVG	LOW	LM	Measured	B	TC + CC	blue	1998.5	831.5	883.5	1167	2882	23.2206	11.4648	11.9902	11.7558	35.2108
voom	age	1. low-high exp genes	LL	LOW	LM	Measured	B	TC + CC	blue	2727					32.6939
voom	age	1. low-high exp genes	LLS	LOW	LM	Measured	B	TC + CC	blue	1167					11.7558
voom	age	1. low-high exp genes	NTR	LOW	LM	Measured	B	TC + CC	blue	2882					35.2108
voom	age	1. low-high exp genes	RS	LOW	LM	Measured	B	TC + CC	blue	1218					13.2219
voom	age	1. low-high exp genes	AVG	HI	LM	Measured	B	TC + CC	blue	511.25	78.25	84.75	433	596	64.8669	26.2062	26.4071	38.6607	91.274
voom	age	1. low-high exp genes	LL	HI	LM	Measured	B	TC + CC	blue	596					88.8227
voom	age	1. low-high exp genes	LLS	HI	LM	Measured	B	TC + CC	blue	493					40.7102
voom	age	1. low-high exp genes	NTR	HI	LM	Measured	B	TC + CC	blue	523					91.274
voom	age	1. low-high exp genes	RS	HI	LM	Measured	B	TC + CC	blue	433					38.6607
voom	age	2. med-high exp genes	AVG	LOW	LM	Measured	B	TC + CC	red	1997	826	887	1171	2884	23.4015	11.518	12.1639	11.8835	35.5654
voom	age	2. med-high exp genes	LL	LOW	LM	Measured	B	TC + CC	red	2718					32.8539
voom	age	2. med-high exp genes	LLS	LOW	LM	Measured	B	TC + CC	red	1171					11.8835
voom	age	2. med-high exp genes	NTR	LOW	LM	Measured	B	TC + CC	red	2884					35.5654
voom	age	2. med-high exp genes	RS	LOW	LM	Measured	B	TC + CC	red	1215					13.3034
voom	age	2. med-high exp genes	AVG	HI	LM	Measured	B	TC + CC	red	508	80	80	428	588	64.7657	26.5514	26.3338	38.2143	91.0995
voom	age	2. med-high exp genes	LL	HI	LM	Measured	B	TC + CC	red	588					88.9561
voom	age	2. med-high exp genes	LLS	HI	LM	Measured	B	TC + CC	red	494					40.7927
voom	age	2. med-high exp genes	NTR	HI	LM	Measured	B	TC + CC	red	522					91.0995
voom	age	2. med-high exp genes	RS	HI	LM	Measured	B	TC + CC	red	428					38.2143
voom	age	3. high exp genes	AVG	LOW	LM	Measured	B	TC + CC	green	1791	731	784	1060	2575	25.2288	12.3083	13.2327	12.9205	38.4615
voom	age	3. high exp genes	LL	LOW	LM	Measured	B	TC + CC	green	2382					34.3773
voom	age	3. high exp genes	LLS	LOW	LM	Measured	B	TC + CC	green	1060					12.9205
voom	age	3. high exp genes	NTR	LOW	LM	Measured	B	TC + CC	green	2575					38.4615
voom	age	3. high exp genes	RS	LOW	LM	Measured	B	TC + CC	green	1147					15.1559
voom	age	3. high exp genes	AVG	HI	LM	Measured	B	TC + CC	green	475.25	72.25	76.75	403	552	64.2274	24.5621	24.903	39.6654	89.1304
voom	age	3. high exp genes	LL	HI	LM	Measured	B	TC + CC	green	552					87.7583
voom	age	3. high exp genes	LLS	HI	LM	Measured	B	TC + CC	green	454					40.3556
voom	age	3. high exp genes	NTR	HI	LM	Measured	B	TC + CC	green	492					89.1304
voom	age	3. high exp genes	RS	HI	LM	Measured	B	TC + CC	green	403					39.6654
voom	age	0. all exp genes	AVG	LOW	LM	Measured	B	TC + CC	yellow	2048.5	858.5	913.5	1190	2962	19.397	9.47873	10.0054	9.91832	29.4024
voom	age	0. all exp genes	LL	LOW	LM	Measured	B	TC + CC	yellow	2804					27.2365
voom	age	0. all exp genes	LLS	LOW	LM	Measured	B	TC + CC	yellow	1190					9.91832
voom	age	0. all exp genes	NTR	LOW	LM	Measured	B	TC + CC	yellow	2962					29.4024
voom	age	0. all exp genes	RS	LOW	LM	Measured	B	TC + CC	yellow	1238					11.0309
voom	age	0. all exp genes	AVG	HI	LM	Measured	B	TC + CC	yellow	489.75	74.75	71.25	415	561	66.08	27.0762	26.8568	39.0038	92.9368
voom	age	0. all exp genes	LL	HI	LM	Measured	B	TC + CC	yellow	561					90.0482
voom	age	0. all exp genes	LLS	HI	LM	Measured	B	TC + CC	yellow	483					42.3313
voom	age	0. all exp genes	NTR	HI	LM	Measured	B	TC + CC	yellow	500					92.9368
voom	age	0. all exp genes	RS	HI	LM	Measured	B	TC + CC	yellow	415					39.0038
voom	age	0. all exp genes	AVG	LOW	LM	Measured	C	TC + CC	yellow	2048.5	858.5	913.5	1190	2962	19.397	9.47873	10.0054	9.91832	29.4024
voom	age	0. all exp genes	LL	LOW	LM	Measured	C	TC + CC	yellow	2804					27.2365
voom	age	0. all exp genes	LLS	LOW	LM	Measured	C	TC + CC	yellow	1190					9.91832
voom	age	0. all exp genes	NTR	LOW	LM	Measured	C	TC + CC	yellow	2962					29.4024
voom	age	0. all exp genes	RS	LOW	LM	Measured	C	TC + CC	yellow	1238					11.0309
voom	age	0. all exp genes	AVG	HI	LM	Measured	C	TC + CC	yellow	489.75	74.75	71.25	415	561	66.08	27.0762	26.8568	39.0038	92.9368
voom	age	0. all exp genes	LL	HI	LM	Measured	C	TC + CC	yellow	561					90.0482
voom	age	0. all exp genes	LLS	HI	LM	Measured	C	TC + CC	yellow	483					42.3313
voom	age	0. all exp genes	NTR	HI	LM	Measured	C	TC + CC	yellow	500					92.9368
voom	age	0. all exp genes	RS	HI	LM	Measured	C	TC + CC	yellow	415					39.0038
voom	age	0. all exp genes	AVG	LOW	LM	Measured	D	TC + CC	yellow	2048.5	858.5	913.5	1190	2962	19.397	9.47873	10.0054	9.91832	29.4024
voom	age	0. all exp genes	LL	LOW	LM	Measured	D	TC + CC	yellow	2804					27.2365
voom	age	0. all exp genes	LLS	LOW	LM	Measured	D	TC + CC	yellow	1190					9.91832
voom	age	0. all exp genes	NTR	LOW	LM	Measured	D	TC + CC	yellow	2962					29.4024
voom	age	0. all exp genes	RS	LOW	LM	Measured	D	TC + CC	yellow	1238					11.0309
voom	age	0. all exp genes	AVG	HI	LM	Measured	D	TC + CC	yellow	489.75	74.75	71.25	415	561	66.08	27.0762	26.8568	39.0038	92.9368
voom	age	0. all exp genes	LL	HI	LM	Measured	D	TC + CC	yellow	561					90.0482
voom	age	0. all exp genes	LLS	HI	LM	Measured	D	TC + CC	yellow	483					42.3313
voom	age	0. all exp genes	NTR	HI	LM	Measured	D	TC + CC	yellow	500					92.9368
voom	age	0. all exp genes	RS	HI	LM	Measured	D	TC + CC	yellow	415					39.0038
deseq	bmi	0. all exp genes	AVG	LOW	LM	Measured	A	TC + CC	blue	2173.5	876.5	523.5	1297	2697	19.5837	8.75549	5.16852	10.8282	24.7522
deseq	bmi	0. all exp genes	LL	LOW	LM	Measured	A	TC + CC	blue	1297					10.8282
deseq	bmi	0. all exp genes	LLS	LOW	LM	Measured	A	TC + CC	blue	2412					23.3382
deseq	bmi	0. all exp genes	NTR	LOW	LM	Measured	A	TC + CC	blue	2288					19.4162
deseq	bmi	0. all exp genes	RS	LOW	LM	Measured	A	TC + CC	blue	2697					24.7522
deseq	bmi	0. all exp genes	AVG	HI	LM	Measured	A	TC + CC	blue	416	54	64	362	480	71.5166	30.1924	17.8224	41.3242	89.339
deseq	bmi	0. all exp genes	LL	HI	LM	Measured	A	TC + CC	blue	362					41.3242
deseq	bmi	0. all exp genes	LLS	HI	LM	Measured	A	TC + CC	blue	480					79.0774
deseq	bmi	0. all exp genes	NTR	HI	LM	Measured	A	TC + CC	blue	403					76.3258
deseq	bmi	0. all exp genes	RS	HI	LM	Measured	A	TC + CC	blue	419					89.339
edger	bmi	0. all exp genes	AVG	LOW	LM	Measured	A	TC + CC	red	2146	867	506	1279	2652	19.5056	8.76855	5.10234	10.7371	24.608
edger	bmi	0. all exp genes	LL	LOW	LM	Measured	A	TC + CC	red	1279					10.7371
edger	bmi	0. all exp genes	LLS	LOW	LM	Measured	A	TC + CC	red	2384					23.2178
edger	bmi	0. all exp genes	NTR	LOW	LM	Measured	A	TC + CC	red	2269					19.4597
edger	bmi	0. all exp genes	RS	LOW	LM	Measured	A	TC + CC	red	2652					24.608
edger	bmi	0. all exp genes	AVG	HI	LM	Measured	A	TC + CC	red	412	56	64	356	476	71.6511	30.6373	18.9807	41.0138	90.6318
edger	bmi	0. all exp genes	LL	HI	LM	Measured	A	TC + CC	red	356					41.0138
edger	bmi	0. all exp genes	LLS	HI	LM	Measured	A	TC + CC	red	476					79.2013
edger	bmi	0. all exp genes	NTR	HI	LM	Measured	A	TC + CC	red	400					75.7576
edger	bmi	0. all exp genes	RS	HI	LM	Measured	A	TC + CC	red	416					90.6318
edger	bmi	1. low-high exp genes	AVG	LOW	GLM	Measured	C	TC + CC	blue	2000	833	481	1167	2481	27.1818	12.5797	7.09092	14.6021	34.2727
edger	bmi	1. low-high exp genes	LL	LOW	GLM	Measured	C	TC + CC	blue	1167					14.6021
edger	bmi	1. low-high exp genes	LLS	LOW	GLM	Measured	C	TC + CC	blue	2231					30.9046
edger	bmi	1. low-high exp genes	NTR	LOW	GLM	Measured	C	TC + CC	blue	2121					28.9477
edger	bmi	1. low-high exp genes	RS	LOW	GLM	Measured	C	TC + CC	blue	2481					34.2727
edger	bmi	1. low-high exp genes	AVG	HI	GLM	Measured	C	TC + CC	blue	450.5	76.5	74.5	374	525	69.3549	30.7982	20.0884	38.5567	89.4434
edger	bmi	1. low-high exp genes	LL	HI	GLM	Measured	C	TC + CC	blue	374					38.5567
edger	bmi	1. low-high exp genes	LLS	HI	GLM	Measured	C	TC + CC	blue	525					77.6627
edger	bmi	1. low-high exp genes	NTR	HI	GLM	Measured	C	TC + CC	blue	437					71.757
edger	bmi	1. low-high exp genes	RS	HI	GLM	Measured	C	TC + CC	blue	466					89.4434
edger	bmi	1. low-high exp genes	AVG	LOW	glmQLF	Measured	C	TC + CC	green	1561.25	609.25	267.75	952	1829	27.5269	12.5041	5.64317	15.0229	33.1701
edger	bmi	1. low-high exp genes	LL	LOW	glmQLF	Measured	C	TC + CC	green	952					15.0229
edger	bmi	1. low-high exp genes	LLS	LOW	glmQLF	Measured	C	TC + CC	green	1829					33.1701
edger	bmi	1. low-high exp genes	NTR	LOW	glmQLF	Measured	C	TC + CC	green	1773					32.2481
edger	bmi	1. low-high exp genes	RS	LOW	glmQLF	Measured	C	TC + CC	green	1691					29.6667
edger	bmi	1. low-high exp genes	AVG	HI	glmQLF	Measured	C	TC + CC	green	423.5	51.5	38.5	372	462	71.6704	25.9702	14.7374	45.7002	86.4078
edger	bmi	1. low-high exp genes	LL	HI	glmQLF	Measured	C	TC + CC	green	372					45.7002
edger	bmi	1. low-high exp genes	LLS	HI	glmQLF	Measured	C	TC + CC	green	462					78.7053
edger	bmi	1. low-high exp genes	NTR	HI	glmQLF	Measured	C	TC + CC	green	415					75.8684
edger	bmi	1. low-high exp genes	RS	HI	glmQLF	Measured	C	TC + CC	green	445					86.4078
voom	bmi	0. all exp genes	AVG	LOW	LM	Measured	D	5PC	green	1091	240	597	851	1688	13.2227	4.20976	8.71079	9.01292	21.9335
voom	bmi	0. all exp genes	LL	LOW	LM	Measured	D	5PC	green	1688					21.9335
voom	bmi	0. all exp genes	LLS	LOW	LM	Measured	D	5PC	green	926					11.3815
voom	bmi	0. all exp genes	NTR	LOW	LM	Measured	D	5PC	green	851					9.01292
voom	bmi	0. all exp genes	RS	LOW	LM	Measured	D	5PC	green	899					10.5628
voom	bmi	0. all exp genes	AVG	LOW	LM	Measured	D	CC	red	2094	662	1019	1432	3113	18.2537	6.3837	11.5614	11.87	29.8152
voom	bmi	0. all exp genes	LL	LOW	LM	Measured	D	CC	red	1432					11.87
voom	bmi	0. all exp genes	LLS	LOW	LM	Measured	D	CC	red	3113					29.8152
voom	bmi	0. all exp genes	NTR	LOW	LM	Measured	D	CC	red	1778					14.4131
voom	bmi	0. all exp genes	RS	LOW	LM	Measured	D	CC	red	2053					16.9166
voom	bmi	0. all exp genes	AVG	LOW	LM	Measured	D	TC+CC+5HC	purple	2315.25	748.25	494.75	1567	2810	20.4985	7.53202	4.93596	12.9665	25.4345
voom	bmi	0. all exp genes	LL	LOW	LM	Measured	D	TC+CC+5HC	purple	1567					12.9665
voom	bmi	0. all exp genes	LLS	LOW	LM	Measured	D	TC+CC+5HC	purple	2577					24.3665
voom	bmi	0. all exp genes	NTR	LOW	LM	Measured	D	TC+CC+5HC	purple	2307					19.2266
voom	bmi	0. all exp genes	RS	LOW	LM	Measured	D	TC+CC+5HC	purple	2810					25.4345
voom	bmi	0. all exp genes	AVG	LOW	LM	Measured	D	TC	blue	1862.5	482.5	350.5	1380	2213	17.5408	5.37684	3.81816	12.1639	21.3589
voom	bmi	0. all exp genes	LL	LOW	LM	Measured	D	TC	blue	1380					12.1639
voom	bmi	0. all exp genes	LLS	LOW	LM	Measured	D	TC	blue	2024					20.1875
voom	bmi	0. all exp genes	NTR	LOW	LM	Measured	D	TC	blue	1833					16.4527
voom	bmi	0. all exp genes	RS	LOW	LM	Measured	D	TC	blue	2213					21.3589
voom	bmi	0. all exp genes	AVG	LOW	LM	Measured	A	TC + CC	yellow	2183.75	806.75	515.25	1377	2699	19.785	8.30042	5.10206	11.4846	24.887
voom	bmi	0. all exp genes	LL	LOW	LM	Measured	A	TC + CC	yellow	1377					11.4846
voom	bmi	0. all exp genes	LLS	LOW	LM	Measured	A	TC + CC	yellow	2452					23.8986
voom	bmi	0. all exp genes	NTR	LOW	LM	Measured	A	TC + CC	yellow	2207					18.8697
voom	bmi	0. all exp genes	RS	LOW	LM	Measured	A	TC + CC	yellow	2699					24.887
voom	bmi	0. all exp genes	AVG	HI	LM	Measured	D	5PC	green	174	19	16	155	190	69.4083	10.5847	23.4061	58.8235	92.8144
voom	bmi	0. all exp genes	LL	HI	LM	Measured	D	5PC	green	155					92.8144
voom	bmi	0. all exp genes	LLS	HI	LM	Measured	D	5PC	green	168					62.4535
voom	bmi	0. all exp genes	NTR	HI	LM	Measured	D	5PC	green	190					58.8235
voom	bmi	0. all exp genes	RS	HI	LM	Measured	D	5PC	green	183					63.5417
voom	bmi	0. all exp genes	AVG	HI	LM	Measured	D	CC	red	399	21	15	378	414	75.5095	16.447	9.59692	59.0625	85.1064
voom	bmi	0. all exp genes	LL	HI	LM	Measured	D	CC	red	378					59.0625
voom	bmi	0. all exp genes	LLS	HI	LM	Measured	D	CC	red	414					84.1463
voom	bmi	0. all exp genes	NTR	HI	LM	Measured	D	CC	red	404					73.7226
voom	bmi	0. all exp genes	RS	HI	LM	Measured	D	CC	red	400					85.1064
voom	bmi	0. all exp genes	AVG	HI	LM	Measured	D	TC+CC+5HC	purple	504.75	43.75	63.25	461	568	72.0749	20.2189	17.8187	51.856	89.8936
voom	bmi	0. all exp genes	LL	HI	LM	Measured	D	TC+CC+5HC	purple	461					51.856
voom	bmi	0. all exp genes	LLS	HI	LM	Measured	D	TC+CC+5HC	purple	568					76.5499
voom	bmi	0. all exp genes	NTR	HI	LM	Measured	D	TC+CC+5HC	purple	483					70
voom	bmi	0. all exp genes	RS	HI	LM	Measured	D	TC+CC+5HC	purple	507					89.8936
voom	bmi	0. all exp genes	AVG	HI	LM	Measured	D	TC	blue	360.75	36.75	30.25	324	391	71.0332	19.3586	18.9178	51.6746	89.951
voom	bmi	0. all exp genes	LL	HI	LM	Measured	D	TC	blue	324					51.6746
voom	bmi	0. all exp genes	LLS	HI	LM	Measured	D	TC	blue	391					73.0841
voom	bmi	0. all exp genes	NTR	HI	LM	Measured	D	TC	blue	361					69.4231
voom	bmi	0. all exp genes	RS	HI	LM	Measured	D	TC	blue	367					89.951
voom	bmi	0. all exp genes	AVG	HI	LM	Measured	A	TC + CC	yellow	439.75	59.75	65.25	380	505	70.6103	26.4243	19.1692	44.186	89.7796
voom	bmi	0. all exp genes	LL	HI	LM	Measured	A	TC + CC	yellow	380					44.186
voom	bmi	0. all exp genes	LLS	HI	LM	Measured	A	TC + CC	yellow	505					78.2946
voom	bmi	0. all exp genes	NTR	HI	LM	Measured	A	TC + CC	yellow	426					70.1812
voom	bmi	0. all exp genes	RS	HI	LM	Measured	A	TC + CC	yellow	448					89.7796
voom	bmi	0. all exp genes	AVG	LOW	VlmF	Measured	C	TC + CC	red	2505.75	1012.75	804.25	1493	3310	15.2379	10.0819	9.44888	5.15592	24.6868
voom	bmi	0. all exp genes	LL	LOW	VlmF	Measured	C	TC + CC	red	1493					5.15592
voom	bmi	0. all exp genes	LLS	LOW	VlmF	Measured	C	TC + CC	red	3310					24.6868
voom	bmi	0. all exp genes	NTR	LOW	VlmF	Measured	C	TC + CC	red	2225					12.2212
voom	bmi	0. all exp genes	RS	LOW	VlmF	Measured	C	TC + CC	red	2995					18.8876
voom	bmi	0. all exp genes	AVG	HI	VlmF	Measured	C	TC + CC	red	410	52	48	358	458	70.5513	24.2383	16.3304	46.3131	86.8817
voom	bmi	0. all exp genes	LL	HI	VlmF	Measured	C	TC + CC	red	358					46.3131
voom	bmi	0. all exp genes	LLS	HI	VlmF	Measured	C	TC + CC	red	458					76.8456
voom	bmi	0. all exp genes	NTR	HI	VlmF	Measured	C	TC + CC	red	420					72.1649
voom	bmi	0. all exp genes	RS	HI	VlmF	Measured	C	TC + CC	red	404					86.8817
voom	bmi	1. low-high exp genes	AVG	LOW	LM	Measured	B	TC + CC	blue	2159	809	549	1350	2708	24.1178	10.2702	6.9444	13.8476	31.0622
voom	bmi	1. low-high exp genes	LL	LOW	LM	Measured	B	TC + CC	blue	1350					13.8476
voom	bmi	1. low-high exp genes	LLS	LOW	LM	Measured	B	TC + CC	blue	2400					27.81
voom	bmi	1. low-high exp genes	NTR	LOW	LM	Measured	B	TC + CC	blue	2178					23.7514
voom	bmi	1. low-high exp genes	RS	LOW	LM	Measured	B	TC + CC	blue	2708					31.0622
voom	bmi	1. low-high exp genes	AVG	HI	LM	Measured	B	TC + CC	blue	466.5	69.5	74.5	397	541	69.2123	26.7524	19.6353	42.4599	88.8476
voom	bmi	1. low-high exp genes	LL	HI	LM	Measured	B	TC + CC	blue	397					42.4599
voom	bmi	1. low-high exp genes	LLS	HI	LM	Measured	B	TC + CC	blue	541					76.6289
voom	bmi	1. low-high exp genes	NTR	HI	LM	Measured	B	TC + CC	blue	450					68.9127
voom	bmi	1. low-high exp genes	RS	HI	LM	Measured	B	TC + CC	blue	478					88.8476
voom	bmi	2. med-high exp genes	AVG	LOW	LM	Measured	B	TC + CC	red	2132.75	775.75	487.25	1357	2620	24.1221	9.94388	6.20897	14.1782	30.3311
voom	bmi	2. med-high exp genes	LL	LOW	LM	Measured	B	TC + CC	red	1357					14.1782
voom	bmi	2. med-high exp genes	LLS	LOW	LM	Measured	B	TC + CC	red	2393					28.0902
voom	bmi	2. med-high exp genes	NTR	LOW	LM	Measured	B	TC + CC	red	2161					23.889
voom	bmi	2. med-high exp genes	RS	LOW	LM	Measured	B	TC + CC	red	2620					30.3311
voom	bmi	2. med-high exp genes	AVG	HI	LM	Measured	B	TC + CC	red	469.75	69.75	71.25	400	541	69.4842	26.9763	20.0378	42.508	89.5221
voom	bmi	2. med-high exp genes	LL	HI	LM	Measured	B	TC + CC	red	400					42.508
voom	bmi	2. med-high exp genes	LLS	HI	LM	Measured	B	TC + CC	red	541					76.6289
voom	bmi	2. med-high exp genes	NTR	HI	LM	Measured	B	TC + CC	red	451					69.278
voom	bmi	2. med-high exp genes	RS	HI	LM	Measured	B	TC + CC	red	487					89.5221
voom	bmi	3. high exp genes	AVG	LOW	LM	Measured	B	TC + CC	green	2005.75	772.75	439.25	1233	2445	26.9911	11.6686	6.47459	15.3225	33.4656
voom	bmi	3. high exp genes	LL	LOW	LM	Measured	B	TC + CC	green	1233					15.3225
voom	bmi	3. high exp genes	LLS	LOW	LM	Measured	B	TC + CC	green	2242					30.8986
voom	bmi	3. high exp genes	NTR	LOW	LM	Measured	B	TC + CC	green	2103					28.2775
voom	bmi	3. high exp genes	RS	LOW	LM	Measured	B	TC + CC	green	2445					33.4656
voom	bmi	3. high exp genes	AVG	HI	LM	Measured	B	TC + CC	green	471	76	66	395	537	69.0052	27.7304	19.6069	41.2748	88.6121
voom	bmi	3. high exp genes	LL	HI	LM	Measured	B	TC + CC	green	395					41.2748
voom	bmi	3. high exp genes	LLS	HI	LM	Measured	B	TC + CC	green	537					75.5274
voom	bmi	3. high exp genes	NTR	HI	LM	Measured	B	TC + CC	green	454					70.6065
voom	bmi	3. high exp genes	RS	HI	LM	Measured	B	TC + CC	green	498					88.6121
voom	bmi	0. all exp genes	AVG	LOW	LM	Measured	B	TC + CC	yellow	2183.75	806.75	515.25	1377	2699	19.785	8.30042	5.10206	11.4846	24.887
voom	bmi	0. all exp genes	LL	LOW	LM	Measured	B	TC + CC	yellow	1377					11.4846
voom	bmi	0. all exp genes	LLS	LOW	LM	Measured	B	TC + CC	yellow	2452					23.8986
voom	bmi	0. all exp genes	NTR	LOW	LM	Measured	B	TC + CC	yellow	2207					18.8697
voom	bmi	0. all exp genes	RS	LOW	LM	Measured	B	TC + CC	yellow	2699					24.887
voom	bmi	0. all exp genes	AVG	HI	LM	Measured	B	TC + CC	yellow	439.75	59.75	65.25	380	505	70.6103	26.4243	19.1692	44.186	89.7796
voom	bmi	0. all exp genes	LL	HI	LM	Measured	B	TC + CC	yellow	380					44.186
voom	bmi	0. all exp genes	LLS	HI	LM	Measured	B	TC + CC	yellow	505					78.2946
voom	bmi	0. all exp genes	NTR	HI	LM	Measured	B	TC + CC	yellow	426					70.1812
voom	bmi	0. all exp genes	RS	HI	LM	Measured	B	TC + CC	yellow	448					89.7796
voom	bmi	0. all exp genes	AVG	LOW	LM	Measured	C	TC + CC	yellow	2183.75	806.75	515.25	1377	2699	19.785	8.30042	5.10206	11.4846	24.887
voom	bmi	0. all exp genes	LL	LOW	LM	Measured	C	TC + CC	yellow	1377					11.4846
voom	bmi	0. all exp genes	LLS	LOW	LM	Measured	C	TC + CC	yellow	2452					23.8986
voom	bmi	0. all exp genes	NTR	LOW	LM	Measured	C	TC + CC	yellow	2207					18.8697
voom	bmi	0. all exp genes	RS	LOW	LM	Measured	C	TC + CC	yellow	2699					24.887
voom	bmi	0. all exp genes	AVG	HI	LM	Measured	C	TC + CC	yellow	439.75	59.75	65.25	380	505	70.6103	26.4243	19.1692	44.186	89.7796
voom	bmi	0. all exp genes	LL	HI	LM	Measured	C	TC + CC	yellow	380					44.186
voom	bmi	0. all exp genes	LLS	HI	LM	Measured	C	TC + CC	yellow	505					78.2946
voom	bmi	0. all exp genes	NTR	HI	LM	Measured	C	TC + CC	yellow	426					70.1812
voom	bmi	0. all exp genes	RS	HI	LM	Measured	C	TC + CC	yellow	448					89.7796
voom	bmi	0. all exp genes	AVG	LOW	LM	Measured	D	TC + CC	yellow	2183.75	806.75	515.25	1377	2699	19.785	8.30042	5.10206	11.4846	24.887
voom	bmi	0. all exp genes	LL	LOW	LM	Measured	D	TC + CC	yellow	1377					11.4846
voom	bmi	0. all exp genes	LLS	LOW	LM	Measured	D	TC + CC	yellow	2452					23.8986
voom	bmi	0. all exp genes	NTR	LOW	LM	Measured	D	TC + CC	yellow	2207					18.8697
voom	bmi	0. all exp genes	RS	LOW	LM	Measured	D	TC + CC	yellow	2699					24.887
voom	bmi	0. all exp genes	AVG	HI	LM	Measured	D	TC + CC	yellow	439.75	59.75	65.25	380	505	70.6103	26.4243	19.1692	44.186	89.7796
voom	bmi	0. all exp genes	LL	HI	LM	Measured	D	TC + CC	yellow	380					44.186
voom	bmi	0. all exp genes	LLS	HI	LM	Measured	D	TC + CC	yellow	505					78.2946
voom	bmi	0. all exp genes	NTR	HI	LM	Measured	D	TC + CC	yellow	426					70.1812
voom	bmi	0. all exp genes	RS	HI	LM	Measured	D	TC + CC	yellow	448					89.7796
deseq	smoking	0. all exp genes	AVG	LOW	LM	Measured	A	TC + CC	blue	847.75	424.75	346.25	423	1194	10.7319	5.61887	4.89638	5.11302	15.6283
deseq	smoking	0. all exp genes	LL	LOW	LM	Measured	A	TC + CC	blue	1194					15.6283
deseq	smoking	0. all exp genes	LLS	LOW	LM	Measured	A	TC + CC	blue	423					5.11302
deseq	smoking	0. all exp genes	NTR	LOW	LM	Measured	A	TC + CC	blue	1083					13.6691
deseq	smoking	0. all exp genes	RS	LOW	LM	Measured	A	TC + CC	blue	691					8.51719
deseq	smoking	0. all exp genes	AVG	HI	LM	Measured	A	TC + CC	blue	136.25	8.25	8.75	128	145	73.2149	17.2827	15.061	55.9322	88.2759
deseq	smoking	0. all exp genes	LL	HI	LM	Measured	A	TC + CC	blue	128					88.2759
deseq	smoking	0. all exp genes	LLS	HI	LM	Measured	A	TC + CC	blue	132					55.9322
deseq	smoking	0. all exp genes	NTR	HI	LM	Measured	A	TC + CC	blue	140					86.4198
deseq	smoking	0. all exp genes	RS	HI	LM	Measured	A	TC + CC	blue	145					62.2318
edger	smoking	0. all exp genes	AVG	LOW	LM	Measured	A	TC + CC	red	849.25	426.25	354.75	423	1204	10.7342	5.62368	5.02906	5.11055	15.7633
edger	smoking	0. all exp genes	LL	LOW	LM	Measured	A	TC + CC	red	1204					15.7633
edger	smoking	0. all exp genes	LLS	LOW	LM	Measured	A	TC + CC	red	423					5.11055
edger	smoking	0. all exp genes	NTR	LOW	LM	Measured	A	TC + CC	red	1079					13.5689
edger	smoking	0. all exp genes	RS	LOW	LM	Measured	A	TC + CC	red	691					8.49416
edger	smoking	0. all exp genes	AVG	HI	LM	Measured	A	TC + CC	red	137.25	6.25	9.75	131	147	72.9278	18.3444	16.7983	54.5833	89.726
edger	smoking	0. all exp genes	LL	HI	LM	Measured	A	TC + CC	red	131					89.726
edger	smoking	0. all exp genes	LLS	HI	LM	Measured	A	TC + CC	red	131					54.5833
edger	smoking	0. all exp genes	NTR	HI	LM	Measured	A	TC + CC	red	140					84.8485
edger	smoking	0. all exp genes	RS	HI	LM	Measured	A	TC + CC	red	147					62.5532
edger	smoking	1. low-high exp genes	AVG	LOW	GLM	Measured	C	TC + CC	blue	810.75	445.75	333.25	365	1144	15.2198	8.66335	7.89127	6.55649	23.1111
edger	smoking	1. low-high exp genes	LL	LOW	GLM	Measured	C	TC + CC	blue	1144					23.1111
edger	smoking	1. low-high exp genes	LLS	LOW	GLM	Measured	C	TC + CC	blue	365					6.55649
edger	smoking	1. low-high exp genes	NTR	LOW	GLM	Measured	C	TC + CC	blue	1079					18.7522
edger	smoking	1. low-high exp genes	RS	LOW	GLM	Measured	C	TC + CC	blue	655					12.4596
edger	smoking	1. low-high exp genes	AVG	HI	GLM	Measured	C	TC + CC	blue	165.5	14.5	13.5	151	179	70.4843	20.9761	16.5943	49.5082	87.0787
edger	smoking	1. low-high exp genes	LL	HI	GLM	Measured	C	TC + CC	blue	155					87.0787
edger	smoking	1. low-high exp genes	LLS	HI	GLM	Measured	C	TC + CC	blue	151					49.5082
edger	smoking	1. low-high exp genes	NTR	HI	GLM	Measured	C	TC + CC	blue	177					81.1927
edger	smoking	1. low-high exp genes	RS	HI	GLM	Measured	C	TC + CC	blue	179					64.1577
edger	smoking	1. low-high exp genes	AVG	LOW	glmQLF	Measured	C	TC + CC	green	576	332	240	244	816	17.0233	10.7573	9.19775	6.26605	26.2211
edger	smoking	1. low-high exp genes	LL	LOW	glmQLF	Measured	C	TC + CC	green	781					23.0588
edger	smoking	1. low-high exp genes	LLS	LOW	glmQLF	Measured	C	TC + CC	green	244					6.26605
edger	smoking	1. low-high exp genes	NTR	LOW	glmQLF	Measured	C	TC + CC	green	816					26.2211
edger	smoking	1. low-high exp genes	RS	LOW	glmQLF	Measured	C	TC + CC	green	463					12.5474
edger	smoking	1. low-high exp genes	AVG	HI	glmQLF	Measured	C	TC + CC	green	112.25	17.25	12.75	95	125	63.9688	18.3991	10.2644	45.5696	74.2331
edger	smoking	1. low-high exp genes	LL	HI	glmQLF	Measured	C	TC + CC	green	95					71.9697
edger	smoking	1. low-high exp genes	LLS	HI	glmQLF	Measured	C	TC + CC	green	108					45.5696
edger	smoking	1. low-high exp genes	NTR	HI	glmQLF	Measured	C	TC + CC	green	121					74.2331
edger	smoking	1. low-high exp genes	RS	HI	glmQLF	Measured	C	TC + CC	green	125					64.1026
voom	smoking	0. all exp genes	AVG	LOW	LM	Measured	D	5PC	green	599	168	202	431	801	8.78203	2.2744	3.64043	6.50762	12.4225
voom	smoking	0. all exp genes	LL	LOW	LM	Measured	D	5PC	green	801					12.4225
voom	smoking	0. all exp genes	LLS	LOW	LM	Measured	D	5PC	green	431					6.50762
voom	smoking	0. all exp genes	NTR	LOW	LM	Measured	D	5PC	green	634					8.92581
voom	smoking	0. all exp genes	RS	LOW	LM	Measured	D	5PC	green	530					7.27223
voom	smoking	0. all exp genes	AVG	LOW	LM	Measured	D	CC	red	894.5	409.5	295.5	485	1190	11.2941	4.7954	3.81498	6.49873	15.1091
voom	smoking	0. all exp genes	LL	LOW	LM	Measured	D	CC	red	1101					15.1091
voom	smoking	0. all exp genes	LLS	LOW	LM	Measured	D	CC	red	485					6.49873
voom	smoking	0. all exp genes	NTR	LOW	LM	Measured	D	CC	red	1190					12.5461
voom	smoking	0. all exp genes	RS	LOW	LM	Measured	D	CC	red	802					11.0225
voom	smoking	0. all exp genes	AVG	LOW	LM	Measured	D	TC+CC+5HC	purple	990.75	510.75	366.25	480	1357	12.2289	6.56181	4.99632	5.66706	17.2252
voom	smoking	0. all exp genes	LL	LOW	LM	Measured	D	TC+CC+5HC	purple	1357					17.2252
voom	smoking	0. all exp genes	LLS	LOW	LM	Measured	D	TC+CC+5HC	purple	480					5.66706
voom	smoking	0. all exp genes	NTR	LOW	LM	Measured	D	TC+CC+5HC	purple	1245					15.4774
voom	smoking	0. all exp genes	RS	LOW	LM	Measured	D	TC+CC+5HC	purple	881					10.5458
voom	smoking	0. all exp genes	AVG	LOW	LM	Measured	D	TC	blue	787.75	370.75	292.25	417	1080	10.776	5.2601	4.52364	5.51587	15.2996
voom	smoking	0. all exp genes	LL	LOW	LM	Measured	D	TC	blue	1080					15.2996
voom	smoking	0. all exp genes	LLS	LOW	LM	Measured	D	TC	blue	417					5.51587
voom	smoking	0. all exp genes	NTR	LOW	LM	Measured	D	TC	blue	883					12.0711
voom	smoking	0. all exp genes	RS	LOW	LM	Measured	D	TC	blue	771					10.2173
voom	smoking	0. all exp genes	AVG	LOW	LM	Measured	A	TC + CC	yellow	980.25	495.25	354.75	485	1335	12.1289	6.42705	4.79982	5.70186	16.9287
voom	smoking	0. all exp genes	LL	LOW	LM	Measured	A	TC + CC	yellow	1335					16.9287
voom	smoking	0. all exp genes	LLS	LOW	LM	Measured	A	TC + CC	yellow	485					5.70186
voom	smoking	0. all exp genes	NTR	LOW	LM	Measured	A	TC + CC	yellow	1234					15.4443
voom	smoking	0. all exp genes	RS	LOW	LM	Measured	A	TC + CC	yellow	867					10.4408
voom	smoking	0. all exp genes	AVG	HI	LM	Measured	D	5PC	green	86.25	5.25	4.75	81	91	71.5839	13.8375	11.0691	57.7465	82.6531
voom	smoking	0. all exp genes	LL	HI	LM	Measured	D	5PC	green	81					82.6531
voom	smoking	0. all exp genes	LLS	HI	LM	Measured	D	5PC	green	91					69.4656
voom	smoking	0. all exp genes	NTR	HI	LM	Measured	D	5PC	green	91					76.4706
voom	smoking	0. all exp genes	RS	HI	LM	Measured	D	5PC	green	82					57.7465
voom	smoking	0. all exp genes	AVG	HI	LM	Measured	D	CC	red	140	7	11	133	151	69.7622	10.197	16.6014	59.5652	86.3636
voom	smoking	0. all exp genes	LL	HI	LM	Measured	D	CC	red	133					86.3636
voom	smoking	0. all exp genes	LLS	HI	LM	Measured	D	CC	red	137					59.5652
voom	smoking	0. all exp genes	NTR	HI	LM	Measured	D	CC	red	139					60.1732
voom	smoking	0. all exp genes	RS	HI	LM	Measured	D	CC	red	151					72.9469
voom	smoking	0. all exp genes	AVG	HI	LM	Measured	D	TC+CC+5HC	purple	182.5	14.5	19.5	168	202	74.5731	19.97	17.2301	54.6032	91.8033
voom	smoking	0. all exp genes	LL	HI	LM	Measured	D	TC+CC+5HC	purple	168					91.8033
voom	smoking	0. all exp genes	LLS	HI	LM	Measured	D	TC+CC+5HC	purple	172					54.6032
voom	smoking	0. all exp genes	NTR	HI	LM	Measured	D	TC+CC+5HC	purple	188					80
voom	smoking	0. all exp genes	RS	HI	LM	Measured	D	TC+CC+5HC	purple	202					71.8861
voom	smoking	0. all exp genes	AVG	HI	LM	Measured	D	TC	blue	150.5	15.5	21.5	135	172	76.6423	21.9864	16.5084	54.6559	93.1507
voom	smoking	0. all exp genes	LL	HI	LM	Measured	D	TC	blue	136					93.1507
voom	smoking	0. all exp genes	LLS	HI	LM	Measured	D	TC	blue	135					54.6559
voom	smoking	0. all exp genes	NTR	HI	LM	Measured	D	TC	blue	159					79.5
voom	smoking	0. all exp genes	RS	HI	LM	Measured	D	TC	blue	172					79.2627
voom	smoking	0. all exp genes	AVG	HI	LM	Measured	A	TC + CC	yellow	178.25	18.25	18.75	160	197	74.2776	18.4334	16.6315	55.8442	90.9091
voom	smoking	0. all exp genes	LL	HI	LM	Measured	A	TC + CC	yellow	160					90.9091
voom	smoking	0. all exp genes	LLS	HI	LM	Measured	A	TC + CC	yellow	172					55.8442
voom	smoking	0. all exp genes	NTR	HI	LM	Measured	A	TC + CC	yellow	184					80
voom	smoking	0. all exp genes	RS	HI	LM	Measured	A	TC + CC	yellow	197					70.3571
voom	smoking	0. all exp genes	AVG	LOW	VlmF	Measured	C	TC + CC	red	1055	485	418	570	1473	12.5035	6.11908	5.32296	6.38441	17.8265
voom	smoking	0. all exp genes	LL	LOW	VlmF	Measured	C	TC + CC	red	1473					17.8265
voom	smoking	0. all exp genes	LLS	LOW	VlmF	Measured	C	TC + CC	red	570					6.38441
voom	smoking	0. all exp genes	NTR	LOW	VlmF	Measured	C	TC + CC	red	1303					15.7939
voom	smoking	0. all exp genes	RS	LOW	VlmF	Measured	C	TC + CC	red	874					10.0092
voom	smoking	0. all exp genes	AVG	HI	VlmF	Measured	C	TC + CC	red	187.25	21.25	11.75	166	199	72.7833	16.6639	15.0474	56.1194	87.8307
voom	smoking	0. all exp genes	LL	HI	VlmF	Measured	C	TC + CC	red	166					87.8307
voom	smoking	0. all exp genes	LLS	HI	VlmF	Measured	C	TC + CC	red	188					56.1194
voom	smoking	0. all exp genes	NTR	HI	VlmF	Measured	C	TC + CC	red	196					79.0323
voom	smoking	0. all exp genes	RS	HI	VlmF	Measured	C	TC + CC	red	199					68.1507
voom	smoking	1. low-high exp genes	AVG	LOW	LM	Measured	B	TC + CC	blue	952.75	482.75	343.25	470	1296	15.5478	8.69145	5.86665	6.85631	21.4144
voom	smoking	1. low-high exp genes	LL	LOW	LM	Measured	B	TC + CC	blue	1296					21.4144
voom	smoking	1. low-high exp genes	LLS	LOW	LM	Measured	B	TC + CC	blue	470					6.85631
voom	smoking	1. low-high exp genes	NTR	LOW	LM	Measured	B	TC + CC	blue	1227					21.097
voom	smoking	1. low-high exp genes	RS	LOW	LM	Measured	B	TC + CC	blue	818					12.8233
voom	smoking	1. low-high exp genes	AVG	HI	LM	Measured	B	TC + CC	blue	188.75	13.75	18.25	175	207	73.4677	19.8092	18.6376	53.6585	92.1053
voom	smoking	1. low-high exp genes	LL	HI	LM	Measured	B	TC + CC	blue	175					92.1053
voom	smoking	1. low-high exp genes	LLS	HI	LM	Measured	B	TC + CC	blue	176					53.6585
voom	smoking	1. low-high exp genes	NTR	HI	LM	Measured	B	TC + CC	blue	197					78.1746
voom	smoking	1. low-high exp genes	RS	HI	LM	Measured	B	TC + CC	blue	207					69.9324
voom	smoking	2. med-high exp genes	AVG	LOW	LM	Measured	B	TC + CC	red	950.25	478.25	345.75	472	1296	15.6808	8.71916	5.96609	6.96165	21.6469
voom	smoking	2. med-high exp genes	LL	LOW	LM	Measured	B	TC + CC	red	1296					21.6469
voom	smoking	2. med-high exp genes	LLS	LOW	LM	Measured	B	TC + CC	red	472					6.96165
voom	smoking	2. med-high exp genes	NTR	LOW	LM	Measured	B	TC + CC	red	1223					21.2881
voom	smoking	2. med-high exp genes	RS	LOW	LM	Measured	B	TC + CC	red	810					12.8266
voom	smoking	2. med-high exp genes	AVG	HI	LM	Measured	B	TC + CC	red	190	13	17	177	207	73.4857	19.5935	18.7018	53.8922	92.1875
voom	smoking	2. med-high exp genes	LL	HI	LM	Measured	B	TC + CC	red	177					92.1875
voom	smoking	2. med-high exp genes	LLS	HI	LM	Measured	B	TC + CC	red	180					53.8922
voom	smoking	2. med-high exp genes	NTR	HI	LM	Measured	B	TC + CC	red	196					78.4
voom	smoking	2. med-high exp genes	RS	HI	LM	Measured	B	TC + CC	red	207					69.4631
voom	smoking	3. high exp genes	AVG	LOW	LM	Measured	B	TC + CC	green	862.25	452.25	333.75	410	1196	17.1219	9.92138	6.96182	7.20056	24.0838
voom	smoking	3. high exp genes	LL	LOW	LM	Measured	B	TC + CC	green	1196					24.0838
voom	smoking	3. high exp genes	LLS	LOW	LM	Measured	B	TC + CC	green	410					7.20056
voom	smoking	3. high exp genes	NTR	LOW	LM	Measured	B	TC + CC	green	1130					23.6997
voom	smoking	3. high exp genes	RS	LOW	LM	Measured	B	TC + CC	green	713					13.5038
voom	smoking	3. high exp genes	AVG	HI	LM	Measured	B	TC + CC	green	178.5	12.5	13.5	166	192	70.9382	20.1829	19.2792	50.7553	90.2174
voom	smoking	3. high exp genes	LL	HI	LM	Measured	B	TC + CC	green	166					90.2174
voom	smoking	3. high exp genes	LLS	HI	LM	Measured	B	TC + CC	green	168					50.7553
voom	smoking	3. high exp genes	NTR	HI	LM	Measured	B	TC + CC	green	188					76.1134
voom	smoking	3. high exp genes	RS	HI	LM	Measured	B	TC + CC	green	192					66.6667
voom	smoking	0. all exp genes	AVG	LOW	LM	Measured	B	TC + CC	yellow	980.25	495.25	354.75	485	1335	12.1289	6.42705	4.79982	5.70186	16.9287
voom	smoking	0. all exp genes	LL	LOW	LM	Measured	B	TC + CC	yellow	1335					16.9287
voom	smoking	0. all exp genes	LLS	LOW	LM	Measured	B	TC + CC	yellow	485					5.70186
voom	smoking	0. all exp genes	NTR	LOW	LM	Measured	B	TC + CC	yellow	1234					15.4443
voom	smoking	0. all exp genes	RS	LOW	LM	Measured	B	TC + CC	yellow	867					10.4408
voom	smoking	0. all exp genes	AVG	HI	LM	Measured	B	TC + CC	yellow	178.25	18.25	18.75	160	197	74.2776	18.4334	16.6315	55.8442	90.9091
voom	smoking	0. all exp genes	LL	HI	LM	Measured	B	TC + CC	yellow	160					90.9091
voom	smoking	0. all exp genes	LLS	HI	LM	Measured	B	TC + CC	yellow	172					55.8442
voom	smoking	0. all exp genes	NTR	HI	LM	Measured	B	TC + CC	yellow	184					80
voom	smoking	0. all exp genes	RS	HI	LM	Measured	B	TC + CC	yellow	197					70.3571
voom	smoking	0. all exp genes	AVG	LOW	LM	Measured	C	TC + CC	yellow	980.25	495.25	354.75	485	1335	12.1289	6.42705	4.79982	5.70186	16.9287
voom	smoking	0. all exp genes	LL	LOW	LM	Measured	C	TC + CC	yellow	1335					16.9287
voom	smoking	0. all exp genes	LLS	LOW	LM	Measured	C	TC + CC	yellow	485					5.70186
voom	smoking	0. all exp genes	NTR	LOW	LM	Measured	C	TC + CC	yellow	1234					15.4443
voom	smoking	0. all exp genes	RS	LOW	LM	Measured	C	TC + CC	yellow	867					10.4408
voom	smoking	0. all exp genes	AVG	HI	LM	Measured	C	TC + CC	yellow	178.25	18.25	18.75	160	197	74.2776	18.4334	16.6315	55.8442	90.9091
voom	smoking	0. all exp genes	LL	HI	LM	Measured	C	TC + CC	yellow	160					90.9091
voom	smoking	0. all exp genes	LLS	HI	LM	Measured	C	TC + CC	yellow	172					55.8442
voom	smoking	0. all exp genes	NTR	HI	LM	Measured	C	TC + CC	yellow	184					80
voom	smoking	0. all exp genes	RS	HI	LM	Measured	C	TC + CC	yellow	197					70.3571
voom	smoking	0. all exp genes	AVG	LOW	LM	Measured	D	TC + CC	yellow	980.25	495.25	354.75	485	1335	12.1289	6.42705	4.79982	5.70186	16.9287
voom	smoking	0. all exp genes	LL	LOW	LM	Measured	D	TC + CC	yellow	1335					16.9287
voom	smoking	0. all exp genes	LLS	LOW	LM	Measured	D	TC + CC	yellow	485					5.70186
voom	smoking	0. all exp genes	NTR	LOW	LM	Measured	D	TC + CC	yellow	1234					15.4443
voom	smoking	0. all exp genes	RS	LOW	LM	Measured	D	TC + CC	yellow	867					10.4408
voom	smoking	0. all exp genes	AVG	HI	LM	Measured	D	TC + CC	yellow	178.25	18.25	18.75	160	197	74.2776	18.4334	16.6315	55.8442	90.9091
voom	smoking	0. all exp genes	LL	HI	LM	Measured	D	TC + CC	yellow	160					90.9091
voom	smoking	0. all exp genes	LLS	HI	LM	Measured	D	TC + CC	yellow	172					55.8442
voom	smoking	0. all exp genes	NTR	HI	LM	Measured	D	TC + CC	yellow	184					80
voom	smoking	0. all exp genes	RS	HI	LM	Measured	D	TC + CC	yellow	197					70.3571
